# Supplementary material for: Phylogenetic relationships of †Luisiella feruglioi (Bordas) and the recognition of a new clade of freshwater teleosts from the Jurassic of Gondwana
Source: PubMed Central journal article supplement (PMC4668602; doi:10.1186/s12862-015-0551-6), 2015-12-03

## List of Characters

| Character name                                                      | character states |                                                                         |
|---------------------------------------------------------------------|------------------|-------------------------------------------------------------------------|
| 1. Suture between left and right frontal bones                      | 0                | smooth (harmonic suture)                                                |
|                                                                     | 1                | serrated                                                                |
| 2. Anterior margin of frontal                                       | 0                | narrower than posterior margin                                          |
|                                                                     | 1                | of similar width or slightly wider than posterior margin                |
| 3. Shape of nasal bones                                             | 0                | flat, approximately rectangular                                         |
|                                                                     | 1                | flat, triangular                                                        |
|                                                                     | 2                | tubular but straight                                                    |
|                                                                     | 3                | tubular and strongly curved                                             |
| 4. Relationship between left and right nasal bones                  | 0                | in contact along the midline                                            |
|                                                                     | 1                | separated                                                               |
| 5. Supraoccipital bone                                              | 0                | absent                                                                  |
|                                                                     | 1                | present                                                                 |
| 6. Supraoccipital crest                                             | 0                | absent or poorly developed                                              |
|                                                                     | 1                | well-developed, spine-like supraoccipital crest                         |
|                                                                     | 2                | well-developed, high and triangular supraoccipital crest                |
|                                                                     | 3                | hypertrophied, forming a pectinate blade                                |
| 7. Condition of skull roof                                          | 0                | medioparietal                                                           |
|                                                                     | 1                | lateroparietal                                                          |
| 8. Relative shape of the extraescapular bone/s                      | 0                | quadrangular or semicircular not expanded caudally                      |
|                                                                     | 1                | tubular shape                                                           |
|                                                                     | 2                | approximately triangular, expanded caudally                             |
|                                                                     | 3                | expanded rostrally                                                      |
| 9. Recessus lateralis                                               | 0                | absent                                                                  |
|                                                                     | 1                | present                                                                 |
| 10. Ossified bulla in the prootic bone                              | 0                | absent                                                                  |
|                                                                     | 1                | present                                                                 |
| 11. Posttemporal fossa                                              | 0                | absent                                                                  |
|                                                                     | 1                | present and separated from the fossa Bridgei                            |
|                                                                     | 2                | present and confluent with the fossa Bridgei                            |
| 12. Bones participating in the posttemporal fossa                   | 0                | epiotic, pterotic and exoccipital                                       |
|                                                                     | 1                | epiotic, pterotic, exoccipital and intercalar                           |
|                                                                     | 2                | epiotic, pterotic and parietal                                          |
| 13. Position of the foramen for the glossopharyngeal nerve          | 0                | in the prootic bone                                                     |
|                                                                     | 1                | in the exoccipital bone                                                 |
|                                                                     | 2                | in the basioccipital bone                                               |
| 14. Position of the foramen for the vagus nerve                     | 0                | between the intercalar and exoccipital bones                            |
|                                                                     | 1                | in exoccipital bone                                                     |
|                                                                     | 2                | in the basioccipital                                                    |
|                                                                     | 3                | between the intercalar and basioccipital bones                          |
| 15. Foramina in basioccipital for occipital or spinal arteries      | 0                | present                                                                 |
|                                                                     | 1                | absent                                                                  |
| 16. Trajectory of the dorsal aorta in relation to the basioccipital | 0                | passing through an ossified canal formed by the basioccipital           |
|                                                                     | 1                | passing through a median groove in the basioccipital                    |
|                                                                     | 2                | canal or groove in the surface of the basioccipital bone absent         |
| 17. Posterior myodome                                               | 0                | extending in basioccipital                                              |
|                                                                     | 1                | not extending into basioccipital because it is confined to the prootics |
|                                                                     | 2                | absent                                                                  |
| 18. Ethmopalatine ossifications                                     | 0                | absent                                                                  |
|                                                                     | 1                | present                                                                 |
| 19. Proethmoid ossifications                                        | 0                | absent                                                                  |
|                                                                     | 1                | present                                                                 |
| 20. Independent dermopalatine(s) bone(s)                            | 0                | present                                                                 |
|                                                                     | 1                | absent                                                                  |
| 21. Autopalatine bone                                               | 0                | ossifies late in ontogeny                                               |
|                                                                     | 1                | ossifies early in ontogeny                                              |
|                                                                     | 2                | autopalatine bone absent                                                |
| 22. Vomer                                                           | 0                | paired                                                                  |

| Character name                                                                | character states |                                                                                        |
|-------------------------------------------------------------------------------|------------------|----------------------------------------------------------------------------------------|
|                                                                               | 1                | unpaired                                                                               |
| 23. Basisphenoid                                                              | 0                | present                                                                                |
|                                                                               | 1                | absent                                                                                 |
| 24. Orbitosphenoid bone                                                       | 0                | reduced or absent                                                                      |
|                                                                               | 1                | present and large                                                                      |
| 25. Teeth on parasphenoid                                                     | 0                | absent                                                                                 |
|                                                                               | 1                | present and small                                                                      |
|                                                                               | 2                | present and large                                                                      |
| 26. Posterior extent of parasphenoid                                          | 0                | reaching the anterior margin of the basioccipital                                      |
|                                                                               | 1                | almost reaching the posterior margin of the basioccipital                              |
|                                                                               | 2                | extending posterior to basioccipital                                                   |
| 27. Basipterygoid process of parasphenoid                                     | 0                | present                                                                                |
|                                                                               | 1                | absent                                                                                 |
| 28. Separation between olfactory organ and eye                                | 0                | narrow                                                                                 |
|                                                                               | 1                | broad                                                                                  |
| 29. Shape of the most anterior infraorbital bone                              | 0                | laminar or plate-like                                                                  |
|                                                                               | 1                | tubular                                                                                |
| 30. Fourth and fifth infraorbital bones                                       | 0                | separate                                                                               |
|                                                                               | 1                | fused                                                                                  |
| 31. Circumorbital ring                                                        | 0                | incompletely closed                                                                    |
|                                                                               | 1                | completely closed ring, no space left between bones                                    |
| 32. Number of suborbital bone(s)                                              | 0                | numerous                                                                               |
|                                                                               | 1                | two or three                                                                           |
|                                                                               | 2                | one                                                                                    |
|                                                                               | 3                | none                                                                                   |
| 33. Number of supraorbital bone(s)                                            | 0                | two or more                                                                            |
|                                                                               | 1                | one                                                                                    |
|                                                                               | 2                | none                                                                                   |
| 34. Shape of the supraorbital bone (or anterior supraorbital bone)            | 0                | not expanded                                                                           |
|                                                                               | 1                | expanded anteroventrally                                                               |
| 35. Dermosphenotic                                                            | 0                | small                                                                                  |
|                                                                               | 1                | large, well-developed bone                                                             |
| 36. Independent antorbital bone                                               | 0                | present                                                                                |
|                                                                               | 1                | absent                                                                                 |
| 37. Antorbital bone                                                           | 0                | carrying a portion of the infraorbital canal                                           |
|                                                                               | 1                | without sensory canal                                                                  |
| 38. Shape of antorbital bone                                                  | 0                | approximately triangular                                                               |
|                                                                               | 1                | rectangular                                                                            |
|                                                                               | 2                | tubular and comma-shaped                                                               |
| 39. Posterior infraorbital bones                                              | 0                | small and not overlapping or slightly overlapping the anterior margin of preopercle    |
|                                                                               | 1                | expanded posterior infraorbitals overlapping the anterior margin of preopercle         |
| 40. Hyomandibular bone with a preopercular process<br>at its posterior margin | 0                | absent                                                                                 |
|                                                                               | 1                | present                                                                                |
| 41. Elongation of suspensorium                                                | 0                | absent                                                                                 |
|                                                                               | 1                | present, due to a lengthening of the symplectic                                        |
|                                                                               | 2                | present, due to the occurrence of a cartilage between symplectic and hyomandibula      |
|                                                                               | 3                | present, due to the ventroposterior inclination of the hyomandibula                    |
|                                                                               | 4                | present, due to the occurrence of the quadratojugal separating quadrate and symplectic |
| 42. Hyomandibular articulation with the neurocranium                          | 0                | by means of one articular surface                                                      |
|                                                                               | 1                | by means of two distinct articular surfaces                                            |
| 43. Elongate posteroventral process of quadrate                               | 0                | absent                                                                                 |
|                                                                               | 1                | present                                                                                |
| 44. Shape of the dorsal margin of the quadrate                                | 0                | convex                                                                                 |
|                                                                               | 1                | straight                                                                               |
|                                                                               | 2                | concave                                                                                |
|                                                                               | 3                | sinuous or sigmoid                                                                     |
|                                                                               | 4                | notched                                                                                |
| 45. Symplectic                                                                | 0                | articulates with lower jaw                                                             |
|                                                                               | 1                | does not articulate with lower jaw                                                     |

| Character name                                                     | character states |                                                                                                     |
|--------------------------------------------------------------------|------------------|-----------------------------------------------------------------------------------------------------|
| 46. Covering by orbital ossifications of palatoquadrate area       | 0                | parcially                                                                                           |
| behind and below the orbit                                         | 1                | totally                                                                                             |
| 47. Shape of branchiostegal rays                                   | 0                | variable, including acinaciform and spathiform branchiostegals                                      |
|                                                                    | 1                | uniform, only spathiform branchiostegal rays                                                        |
| 48. Beryciform foramen in anterior ceratohyal                      | 0                | present                                                                                             |
|                                                                    | 1                | absent                                                                                              |
| 49. Number of hypohyal ossifications                               | 0                | one pair                                                                                            |
|                                                                    | 1                | two pairs                                                                                           |
| 50. Trajectory of the hyoidean artery in relation to the hypohyals | 0                | not piercing hipohyal                                                                               |
|                                                                    | 1                | piercing both dorsal and ventral hypohyals                                                          |
|                                                                    | 2                | piercing only the ventral hypohyal                                                                  |
| 51. Urohyal formed as an unpaired tendon-bone                      | 0                | absent                                                                                              |
|                                                                    | 1                | present                                                                                             |
| 52. Gular plate                                                    | 0                | present                                                                                             |
|                                                                    | 1                | absent                                                                                              |
| 53. Suprapreopercle                                                | 0                | absent                                                                                              |
|                                                                    | 1                | present                                                                                             |
| 54. Ventroposterior (excluding dorsal limb) region of preopercle   | 0                | narrow or slightly expanded                                                                         |
|                                                                    | 1                | broadly expanded                                                                                    |
| 55. Shape of preopercle                                            | 0                | "L" shaped, with tapering ends                                                                      |
|                                                                    | 1                | crescent-shaped, long and narrow                                                                    |
|                                                                    | 2                | triangular                                                                                          |
| 56. Interopercle                                                   | 0                | present                                                                                             |
|                                                                    | 1                | absent                                                                                              |
| 57. Anteroventral corner of the opercle                            | 0                | of 70°                                                                                              |
|                                                                    | 1                | of more than 70°                                                                                    |
| 58. Relative position of premaxillary bones                        | 0                | forming part of the tip of the snout, in contact with each other at the midline                     |
|                                                                    | 1                | forming part of the tip of the snout but slightly separated by ethmoidal ossifications              |
|                                                                    | 2                | constituting the main element of an elongated snout, in contact with each other at the midline      |
|                                                                    | 3                | laterally placed and not forming part of the tip of the snout, separated by ethmoidal ossifications |
| 59. Premaxillary ascending process                                 | 0                | absent                                                                                              |
|                                                                    | 1                | present                                                                                             |
| 60. Maxillary teeth                                                | 0                | present                                                                                             |
|                                                                    | 1                | absent                                                                                              |
| 61. Ventral margin of maxilla                                      | 0                | straight or almost straight                                                                         |
|                                                                    | 1                | slightly convex                                                                                     |
|                                                                    | 2                | slightly concave                                                                                    |
| 62. Shape of the maxilla (excluding articular process)             | 0                | uniformly deep                                                                                      |
|                                                                    | 1                | approximately triangular                                                                            |
|                                                                    | 2                | bulbous                                                                                             |
| 63. Shape of the posterior border of the maxilla                   | 0                | concave                                                                                             |
|                                                                    | 1                | convex or straight                                                                                  |
|                                                                    | 2                | acute                                                                                               |
|                                                                    | 3                | notched                                                                                             |
| 64. Number of supramaxillary bones                                 | 0                | two                                                                                                 |
|                                                                    | 1                | one                                                                                                 |
|                                                                    | 2                | none                                                                                                |
| 65. Relative position of supramaxilla(ae)                          | 0                | placed dorsal to the dorsal margin of maxilla                                                       |
|                                                                    | 1                | placed posterodorsal to the maxilla                                                                 |
| 66. Quadrate-mandibular articulation                               | 0                | posterior to orbit                                                                                  |
|                                                                    | 1                | placed below the posterior half of orbit                                                            |
|                                                                    | 2                | placed below anterior half of orbit                                                                 |
|                                                                    | 3                | anterior to orbit                                                                                   |
| 67. Predentary bone                                                | 0                | absent                                                                                              |
|                                                                    | 1                | present                                                                                             |
| 68. Independent retroarticular bone                                | 0                | present                                                                                             |
|                                                                    | 1                | absent                                                                                              |
| 69. Retroarticular and quadrato-mandibular joint                   | 0                | retroarticular included in the joint facet for quadrate                                             |
|                                                                    | 1                | retroarticular excluded from the joint facet for quadrate                                           |

| Character name                                                                                               | character states |                                                                               |
|--------------------------------------------------------------------------------------------------------------|------------------|-------------------------------------------------------------------------------|
| 70. Coronoid bone(s) in lower jaw                                                                            | 0                | present                                                                       |
|                                                                                                              | 1                | absent                                                                        |
| 71. Surangular bone in lower jaw                                                                             | 0                | present                                                                       |
|                                                                                                              | 1                | absent                                                                        |
| 72. Independent articular bone                                                                               | 0                | present                                                                       |
|                                                                                                              | 1                | absent, fused with angular                                                    |
|                                                                                                              | 2                | absent, fused with angular and retroarticular                                 |
| 73. Prearticular bone in lower jaw                                                                           | 0                | present                                                                       |
|                                                                                                              | 1                | absent                                                                        |
| 74. Postarticular process of lower jaw                                                                       | 0                | poorly developed                                                              |
|                                                                                                              | 1                | well developed, extending posterior to the articular facet for quadrate       |
| 75. Characteristic notch (so-called leptolepid notch)<br>in the anterodorsal ascending margin of the dentary | 0                | absent                                                                        |
|                                                                                                              | 1                | present                                                                       |
| 76. Marginal dentition on the jaws                                                                           | 0                | uniform                                                                       |
|                                                                                                              | 1                | variable                                                                      |
| 77. Condition of cephalic sensory canals                                                                     | 0                | with branched tubules                                                         |
|                                                                                                              | 1                | with simple tubules                                                           |
| 78. Cephalic sensory canal components                                                                        | 0                | continuous                                                                    |
|                                                                                                              | 1                | interrupted between them                                                      |
| 79. Middle pit line                                                                                          | 0                | leaving a groove or pore-line on the parietal and pterotic (or dermopterotic) |
|                                                                                                              | 1                | leaving a groove or pore-line on the parietal only                            |
|                                                                                                              | 2                | leaving no trace on the bones                                                 |
| 80. Relative association of the ethmoidal commissure<br>and ossifications of the ethmoidal region            | 0                | not associated, there is no trace of an ethmoidal commissure                  |
|                                                                                                              | 1                | the ethmoidal commissure is completely bone-enclosed in a canal               |
| 81. Relative position of supratemporal commissure                                                            | 0                | it pierces extrascapular bones                                                |
|                                                                                                              | 1                | it pierces parietal bones only, or parietals and supraoccipital               |
| 82. Parietal portion of supraorbital sensory canal                                                           | 0                | present                                                                       |
|                                                                                                              | 1                | absent                                                                        |
| 83. Composition of preopercular sensory canal                                                                | β                | four or less, short simple tubules                                            |
|                                                                                                              | 1                | seven or eight (up to 10), short simple or branched tubules                   |
|                                                                                                              | 2                | 12 or more long, simple or branched tubules                                   |
| 84. Mandibular canal                                                                                         | 0                | enclosed in bone along the whole lower jaw                                    |
|                                                                                                              | 1                | partially running in a tube bone and a groove                                 |
| 85. Endoskeletal basihyal                                                                                    | 0                | absent                                                                        |
|                                                                                                              | 1                | present                                                                       |
| 86. Covering of basibranchials 1 ? 3 by tooth plates                                                         | 0                | 0 not covered, basibranchial tooth plates absent                              |
|                                                                                                              | 1                | 1 basibranchials overlain by paired distributed tooth plates                  |
|                                                                                                              | 2                | 2 basibranchials overlain by median tooth plates                              |
| 87. Tooth plate(s) associated (attached, ankylosed or fused) to<br>pharyngobranchial 1                       | 0                | present                                                                       |
|                                                                                                              | 1                | absent                                                                        |
| 88. Tooth plate(s) associated (attached or fused) to<br>pharyngobranchial 2                                  | 0                | present                                                                       |
|                                                                                                              | 1                | absent                                                                        |
| 89. Tooth plate(s) associated (attached or fused) to<br>pharyngobranchial 3                                  | 0                | present                                                                       |
|                                                                                                              | 1                | absent                                                                        |
| 90. Types of vertebral centra                                                                                | 0                | amphicoelous                                                                  |
|                                                                                                              | 1                | opistocoelus                                                                  |
| 91. Composition of caudal vertebral centra                                                                   | 0                | mineralized chordacentrum and arcocentra                                      |
|                                                                                                              | 1                | chordacentrum and basal part of arcocentra surrounded by autocentrum          |
|                                                                                                              | 2                | basal part of arcocentra surrounded by autocentrum                            |
| 92. Relative condition of midcaudal vertebrae autocentrum                                                    | 0                | thin and smooth                                                               |
|                                                                                                              | 1                | thick and sculptured                                                          |
|                                                                                                              | 2                | thick and smooth                                                              |
| 93. Relationship between autocentrum of midcaudal vertebrae<br>and notochord                                 | 0                | autocentrum not constricting or slightly constricting the notochord           |
|                                                                                                              | 1                | autocentrum strongly constricting the notochord                               |
| 94. Relationship between abdominal neural arches and<br>vertebral centra                                     | 0                | unfused                                                                       |
|                                                                                                              | 1                | fused, except for the first five or six                                       |
|                                                                                                              | 2                | all abdominal neural arches fused                                             |
| 95. Relative condition of the neural arches of the anterior<br>abdominal vertebral centra (3 to 5)           | 0                | separated from each other                                                     |
|                                                                                                              | 1                | in contact, abutting each other                                               |

| Character name                                                                       | character states |                                                                                  |
|--------------------------------------------------------------------------------------|------------------|----------------------------------------------------------------------------------|
| 96. Number of neural spines in each abdominal vertebra                               | 0                | two                                                                              |
|                                                                                      | 1                | one                                                                              |
| 97. Scaphium                                                                         | 0                | absent                                                                           |
|                                                                                      | 1                | present                                                                          |
| 98. Shape of proximal portion of first pleural rib<br>(on third vertebral centrum)   | 0                | narrow                                                                           |
|                                                                                      | 1                | slightly expanded                                                                |
|                                                                                      | 2                | greatly expanded, forming the tripus                                             |
| 99. Relative shape of abdominal neural arches (lateral view)                         | 0                | tapering distally                                                                |
|                                                                                      | 1                | distally expanded, hourglass-shaped                                              |
| 100. Number of transitional vertebrae (between abdominal<br>and caudal regions)      | 0                | four or more                                                                     |
|                                                                                      | 1                | three or less                                                                    |
| 101. Supraneural bones                                                               | 0                | absent                                                                           |
|                                                                                      | 1                | present                                                                          |
| 102. Epineural bones                                                                 | 0                | absent                                                                           |
|                                                                                      | 1                | present                                                                          |
| 103. Epipleural bones                                                                | 0                | absent                                                                           |
|                                                                                      | 1                | present                                                                          |
| 104. Position of epipleural bones relative to the column                             | 0                | located in anterior caudal region                                                |
|                                                                                      | 1                | located in abdominal and anterior caudal region                                  |
| 105. Series of dorsal intermuscular bones in caudal region                           | 0                | absent                                                                           |
|                                                                                      | 1                | present                                                                          |
| 106. Relationship between lateral line system and supracleithrum                     | 0                | emerging at its upper half                                                       |
|                                                                                      | 1                | emerging at its posteroventral margin                                            |
|                                                                                      | 2                | lateral line not piercing the supracleithrum                                     |
| 107. Postsupracleithrum                                                              | 0                | absent                                                                           |
|                                                                                      | 1                | present                                                                          |
| 108. Postcleitra                                                                     | 0                | one to three                                                                     |
|                                                                                      | 1                | four or more                                                                     |
|                                                                                      | 2                | none                                                                             |
| 109. Relative position of coracoid bones                                             | 0                | separated from each other at the midline                                         |
|                                                                                      | 1                | contacting each other forming a midventral coracoid symphysis                    |
| 110. Relationship between pectoral propterygium and first<br>pectoral ray            | 0                | unfused, propterygium free                                                       |
|                                                                                      | 1                | fused                                                                            |
| 111. Number of proximal pectoral radials                                             | 0                | five or more                                                                     |
|                                                                                      | 1                | four or less                                                                     |
| 112. Bifurcation pattern of pectoral fin rays                                        | 0                | symmetric                                                                        |
|                                                                                      | 1                | asymmetric, resulting in two unequal secondary rays                              |
| 113. Pectoral axillary process                                                       | 0                | absent                                                                           |
|                                                                                      | 1                | present                                                                          |
| 114. Pelvic axillary process                                                         | 0                | absent                                                                           |
|                                                                                      | 1                | present                                                                          |
| 115. Fringing fulcra on pectoral fins                                                | 0                | present                                                                          |
|                                                                                      | 1                | absent                                                                           |
| 116. Abdominal scutes                                                                | 0                | absent                                                                           |
|                                                                                      | 1                | present                                                                          |
| 117. Position of dorsal fin origin relative to the origin of the<br>pelvic fin       | 0                | posterior, located above boundary between abdominal and caudal regions           |
|                                                                                      | 1                | posterior, located above caudal region                                           |
|                                                                                      | 2                | anterior                                                                         |
| 118. Shape of dorsal fin margin                                                      | 0                | straight or slightly convex                                                      |
|                                                                                      | 1                | concave (acuminate dorsal fin)                                                   |
| 119. Condition of first dorsal proximal pterygiophore                                | 0                | single structure                                                                 |
|                                                                                      | 1                | bipartite or tripartite                                                          |
| 120. Relationship between first dorsal proximal pterygiophore<br>and dorsal fin rays | 0                | it articulates with dorsal procurrent rays and first dorsal ray                  |
|                                                                                      | 1                | it articulates with procurrent rays only                                         |
| 121. Fringing fulcra on leading margin of dorsal fin                                 | 0                | present                                                                          |
|                                                                                      | 1                | absent                                                                           |
| 122. Shape of anal fin margin                                                        | 0                | straight or slightly convex                                                      |
|                                                                                      | 1                | falcate, concave                                                                 |
| 123. Relative position of first anal proximal pterygiophore                          | 0                | placed anterior to fourth haemal spine in the transitional portion of the column |

| Character name                                                                                         | character states |                                                                             |
|--------------------------------------------------------------------------------------------------------|------------------|-----------------------------------------------------------------------------|
|                                                                                                        | 1                | placed posterior to fourth haemal spine in the caudal portion of the column |
| 124. Fringing fulcra on leading margin of anal fin                                                     | 0                | present                                                                     |
|                                                                                                        | 1                | absent                                                                      |
| 125. Number of vertebrae (including preural centrum 1)                                                 | 0                | less than 45                                                                |
|                                                                                                        | 1                | 45 to 65                                                                    |
|                                                                                                        | 2                | more than 65                                                                |
| 126. Number of neural spines in each caudal vertebra                                                   | 0                | two                                                                         |
|                                                                                                        | 1                | one                                                                         |
| 127. Shape of neural spines from preural caudal vertebrae 3-5                                          | 0                | narrow, without outgrowths                                                  |
|                                                                                                        | 1                | distally expanded by anterior and posterior membranous outgrowths           |
| 128. Angle formed between neural spine and dorsal margin of third preural vertebral centrum (Pu3)      | 0                | less than 45°                                                               |
|                                                                                                        | 1                | more than 45°                                                               |
| 129. Relative length of neural spine on second preural centrum (Pu2)                                   | 0                | shorter than neural spine on third preural centrum                          |
|                                                                                                        | 1                | as long as neural spine on third preural centrum                            |
| 130. Anterior processes on caudal preural neural and haemal arches                                     | 0                | absent                                                                      |
|                                                                                                        | 1                | present                                                                     |
| 131. Neural arch on preural centrum 1 (Pu1)                                                            | 0                | present and well developed                                                  |
|                                                                                                        | 1                | absent or greatly reduced                                                   |
| 132. Neural spine on preural centrum 1 (Pu1)                                                           | 0                | absent                                                                      |
|                                                                                                        | 1                | present and short                                                           |
|                                                                                                        | 2                | present and long, close to, or reaching the dorsal margin of the body       |
| 133. Condition of preural haemal arches (excluding centrum Pu1) in relation to their respective centra | 0                | unfused                                                                     |
|                                                                                                        | 1                | laterally fused                                                             |
|                                                                                                        | 2                | medially fused, laterally unfused                                           |
| 134. Relationship between parhypural and centrum Pu1                                                   | 0                | unfused                                                                     |
|                                                                                                        | 1                | laterally fused                                                             |
|                                                                                                        | 2                | medially fused, laterally unfused                                           |
| 135. Hypurapophysis                                                                                    | 0                | absent                                                                      |
|                                                                                                        | 1                | present                                                                     |
| 136. Number of ural centra                                                                             | 0                | three or more                                                               |
|                                                                                                        | 1                | two                                                                         |
|                                                                                                        | 2                | none                                                                        |
| 137. Neural arch on first ural centrum                                                                 | 0                | present                                                                     |
|                                                                                                        | 1                | absent                                                                      |
| 138. Neural spine on first ural centrum                                                                | 0                | present                                                                     |
|                                                                                                        | 1                | absent                                                                      |
| 139. Uroneural cartilage                                                                               | 0                | absent                                                                      |
|                                                                                                        | 1                | present                                                                     |
| 140. Compound cartilaginous neural arch over preural centrum 1 and first ural centrum                  | 0                | absent                                                                      |
|                                                                                                        | 1                | present                                                                     |
| 141. Origin of ural centra                                                                             | 0                | from an expansion of ventral arcualia (occasionally dorsal arcualia too)    |
|                                                                                                        | 1                | from an expansion of dorsal arcualia only                                   |
| 142. Number of epurals                                                                                 | 0                | four or more                                                                |
|                                                                                                        | 1                | three                                                                       |
|                                                                                                        | 2                | two                                                                         |
|                                                                                                        | 3                | one                                                                         |
|                                                                                                        | 4                | none                                                                        |
| 143. Number of uroneurals                                                                              | 0                | seven or more                                                               |
|                                                                                                        | 1                | six                                                                         |
|                                                                                                        | 2                | five or four                                                                |
|                                                                                                        | 3                | three or less                                                               |
|                                                                                                        | 4                | none                                                                        |
| 144. Arrangement of uroneural bones                                                                    | 0                | forming a uniform horizontally inclined series                              |
|                                                                                                        | 1                | forming two series in different angles                                      |
| 145. Anterior extent of first uroneural                                                                | 0                | preural centra 4 or 3                                                       |
|                                                                                                        | 1                | preural centrum 2                                                           |
|                                                                                                        | 2                | preural centrum 1                                                           |
|                                                                                                        | 3                | centra U1 or U2                                                             |
| 146. Number of uroneurals extending forward beyond ?second?                                            | 0                | three or four                                                               |



| Character name                                                                                                       | character states |                                                                                                           |
|----------------------------------------------------------------------------------------------------------------------|------------------|-----------------------------------------------------------------------------------------------------------|
| ural centrum (U2)                                                                                                    | 1                | two                                                                                                       |
|                                                                                                                      | 2                | one                                                                                                       |
| 147. Relative position of anterior uroneurals in relation to ural and preural centra                                 | 0                | placed dorsolaterally to the centra, not covering their lateral surface                                   |
|                                                                                                                      | 1                | placed laterally, covering the lateral surface of centra                                                  |
| 148. Pleurostyle                                                                                                     | 0                | absent                                                                                                    |
|                                                                                                                      | 1                | present                                                                                                   |
| 149. Stegural                                                                                                        | 0                | absent                                                                                                    |
|                                                                                                                      | 1                | present                                                                                                   |
| 150. Uroneural-like bones (modified preural neural arches)                                                           | 0                | absent                                                                                                    |
|                                                                                                                      | 1                | present                                                                                                   |
| 151. Number of hypurals                                                                                              | 0                | eight or more                                                                                             |
|                                                                                                                      | 1                | seven                                                                                                     |
|                                                                                                                      | 2                | six or less                                                                                               |
|                                                                                                                      | 3                | all hypurals fused in an hypural plate                                                                    |
| 152. Relationship between H1 and H2, and ural centra                                                                 | 0                | first and second hypurals supported by a single centrum                                                   |
|                                                                                                                      | 1                | first and second hypurals supported by two different centra                                               |
| 153. Relationship between the first and second hypurals (H1 and H2, respectively) and their corresponding centrum(a) | 0                | laterally unfused to the centra                                                                           |
|                                                                                                                      | 1                | only H2 fused                                                                                             |
|                                                                                                                      | 2                | both hypurals laterally fused to the centrum(a)                                                           |
| 154. Relationship between H1 and H2                                                                                  | 0                | independent from each other                                                                               |
|                                                                                                                      | 1                | fused at their bases only                                                                                 |
|                                                                                                                      | 2                | fused to each other along their length                                                                    |
| 155. Relationship between centra Pu1 and U1                                                                          | 0                | independent from each other                                                                               |
|                                                                                                                      | 1                | fused, forming a compound centrum                                                                         |
| 156. A space or diastema between H2 and H3                                                                           | 0                | absent                                                                                                    |
|                                                                                                                      | 1                | present                                                                                                   |
| 157. Number of caudal fin rays articulating with each hypural                                                        | 0                | one                                                                                                       |
|                                                                                                                      | 1                | two or more                                                                                               |
| 158. Dorsal scute(s) preceding caudal fin                                                                            | 0                | present                                                                                                   |
|                                                                                                                      | 1                | absent                                                                                                    |
| 159. Epaxial basal fulcra                                                                                            | 0                | present                                                                                                   |
|                                                                                                                      | 1                | absent                                                                                                    |
| 160. Hipaxial basal fulcra                                                                                           | 0                | present                                                                                                   |
|                                                                                                                      | 1                | absent                                                                                                    |
| 161. Epaxial procurrent rays                                                                                         | 0                | absent                                                                                                    |
|                                                                                                                      | 1                | present                                                                                                   |
| 162. Number of fringing fulcra on the first caudal fin ray                                                           | 0                | numerous                                                                                                  |
|                                                                                                                      | 1                | one to five                                                                                               |
|                                                                                                                      | 2                | none                                                                                                      |
| 163. Number of principal caudal fin rays                                                                             | 0                | 20 or more                                                                                                |
|                                                                                                                      | 1                | 19                                                                                                        |
|                                                                                                                      | 2                | 18 or less                                                                                                |
| 164. Branched rays on the caudal fin                                                                                 | 0                | 17 or more                                                                                                |
|                                                                                                                      | 1                | 16                                                                                                        |
|                                                                                                                      | 2                | 15 or fewer                                                                                               |
| 165. Number of principal rays in lower lobe of caudal fin                                                            | 0                | ten or more                                                                                               |
|                                                                                                                      | 1                | nine                                                                                                      |
|                                                                                                                      | 2                | eight or less                                                                                             |
| 166. Number of caudal fin rays forming the dorsal and ventral leading margin of the fin                              | 0                | two or more (branched and unbranched)                                                                     |
|                                                                                                                      | 1                | one unbranched caudal fin ray                                                                             |
|                                                                                                                      | 2                | one branched caudal fin ray                                                                               |
| 167. Arrangement of dorsal principal rays of caudal fin and dorsal hypurals                                          | 0                | dorsal principal rays located oblique to main axis of hypurals                                            |
|                                                                                                                      | 1                | dorsal principal rays parallel to main axis of hypurals so that no fin-ray overlies more than one hypural |
| 168. Dorsal processes of the bases of innermost principal caudal fin rays of upper lobe                              | 0                | absent                                                                                                    |
|                                                                                                                      | 1                | present                                                                                                   |
| 169. Relative shape of the bases of innermost principal caudal fin rays                                              | 0                | narrow, with rounded anterior margin                                                                      |
|                                                                                                                      | 1                | expanded, with crenulated anterior margin                                                                 |
| 170. Type of segmentation of marginal principal caudal rays                                                          | 0                | Z or step-like                                                                                            |
|                                                                                                                      | 1                | straight                                                                                                  |

| Character name                                                                                    | character states |                                                                                         |
|---------------------------------------------------------------------------------------------------|------------------|-----------------------------------------------------------------------------------------|
| 171. Relationship between last principal caudal ray and preural haemal spines                     | 0                | last principal caudal ray in contact with parhypural                                    |
|                                                                                                   | 1                | last principal caudal ray in contact with haemal spine of preural centrum 2 (Pu2)       |
|                                                                                                   | 2                | last principal caudal ray in contact with haemal spines of more anterior preural centra |
| 172. Caudal fin margin                                                                            | 0                | deeply forked                                                                           |
|                                                                                                   | 1                | higher than long and unforked                                                           |
|                                                                                                   | 2                | convexly rounded                                                                        |
| 173. Urodermals in the caudal fin                                                                 | 0                | absent                                                                                  |
|                                                                                                   | 1                | present                                                                                 |
| 174. Number of ?urodermals?(i.e., tendon-bones), associated with dorsalmost principal caudal rays | 0                | two                                                                                     |
|                                                                                                   | 1                | one                                                                                     |
|                                                                                                   | 2                | none                                                                                    |
| 175. Type of scales                                                                               | 0                | ganoid of lepisosteoid type                                                             |
|                                                                                                   | 1                | elasmoid of cycloid type                                                                |
|                                                                                                   | 2                | elasmoid of amioid type                                                                 |
| 176. Shape of posterior margin of cycloid scales                                                  | 0                | smooth                                                                                  |
|                                                                                                   | 1                | crenulate                                                                               |
| 177. Type of ornamentation of cycloid scales                                                      | 0                | circuli or circuli and radii                                                            |
|                                                                                                   | 1                | circuli and transverse lines                                                            |
|                                                                                                   | 2                | circuli and squamulae                                                                   |
| 178. Leptocephalous larva                                                                         | 0                | absent                                                                                  |
|                                                                                                   | 1                | present                                                                                 |



Character matrix

| Taxon / Character number              | 1 | 2 | 3 | 4 | 5 | 6 | 7 | 8   | 9 | 10 | 11  | 12 | 13 | 14 | 15 |
|---------------------------------------|---|---|---|---|---|---|---|-----|---|----|-----|----|----|----|----|
| <b>Amia_calva</b>                     | 0 | 1 | 0 | 0 | 0 | - | 0 | 0   | 0 | 0  | 2   | ?  | -  | 0  | 0  |
| <b>Amia_pattersoni</b>                | 0 | 1 | 0 | 1 | 0 | - | 0 | 0   | 0 | 0  | ?   | ?  | -  | 0  | ?  |
| <b>Lepisosteus_osseus</b>             | 0 | 0 | 0 | 0 | 0 | - | 0 | 0   | 0 | 0  | 0   | -  | 0  | 0  | 0  |
| <b>Obaichthys_decoratus</b>           | 0 | 0 | 0 | 0 | 0 | - | 0 | 0   | 0 | ?  | ?   | ?  | ?  | 0  | ?  |
| <b>Aspidorhynchus_acutirostris</b>    | ? | 0 | 0 | 1 | 1 | 0 | 0 | 0   | 0 | 0  | 1   | ?  | 0  | 0  | ?  |
| <b>Belonostomus_tenuirostris</b>      | - | 0 | 0 | 1 | 1 | 0 | 0 | 0   | 0 | 0  | 1   | ?  | 0  | 0  | ?  |
| <b>Hypsocormus_macrodon</b>           | 0 | 1 | 0 | 1 | 0 | - | 1 | -   | 0 | 0  | ?   | ?  | 0  | 0  | ?  |
| <b>Mesturus_verrucosus</b>            | - | 0 | - | - | 0 | - | 1 | ?   | 0 | ?  | 0   | -  | 0  | 0  | ?  |
| <b>Pachycormus_macropterus</b>        | 0 | 1 | 0 | 1 | 0 | - | 1 | -   | 0 | ?  | 2   | ?  | 0  | ?  | 0  |
| <b>Vinctifer_comptoni</b>             | 0 | 1 | 0 | 1 | 1 | 0 | 0 | 0   | 0 | 0  | 1   | ?  | 0  | 3  | 0  |
| <b>Apsopelix_anglicus</b>             | 0 | 0 | 2 | 1 | 1 | 0 | 0 | 2   | 0 | ?  | 2   | 1  | 1  | 1  | 1  |
| <b>Allothrissops_mesogaster</b>       | 0 | 0 | 2 | 1 | 1 | 0 | 0 | 0&1 | 0 | ?  | 2   | 0  | 1  | 1  | ?  |
| <b>Anaethalion_angustus</b>           | 0 | 0 | 2 | 1 | 1 | 0 | 0 | ?   | 0 | ?  | ?   | ?  | ?  | ?  | ?  |
| <b>Anaethalion_knorri</b>             | 0 | 0 | 2 | 1 | 1 | 0 | 0 | 0   | 0 | ?  | ?   | ?  | ?  | ?  | ?  |
| <b>Ascalabos_voithii</b>              | ? | 0 | 2 | 1 | 1 | 0 | 0 | 0   | 0 | ?  | ?   | ?  | ?  | ?  | ?  |
| <b>Bavarichthys_incognitus</b>        | ? | 0 | ? | ? | 1 | 0 | 0 | 2   | 0 | ?  | ?   | ?  | ?  | ?  | ?  |
| <b>Cavenderichthys_talbragarensis</b> | 0 | 0 | 2 | 1 | 1 | 0 | 0 | 0   | 0 | ?  | ?   | ?  | ?  | ?  | ?  |
| <b>Brycon_meeki</b>                   | - | 1 | 2 | 1 | 1 | 1 | 1 | 1   | 0 | 0  | 2   | 2  | 1  | 1  | 1  |
| <b>Chanos_chanos</b>                  | 0 | 0 | 2 | 1 | 1 | 3 | 1 | 1   | 0 | 0  | 2   | 2  | 1  | 1  | 1  |
| <b>Chongichthys_dentatus</b>          | 0 | ? | ? | ? | 1 | 0 | ? | ?   | 0 | ?  | ?   | ?  | 1  | 1  | ?  |
| <b>Crossognathus_sabaudians</b>       | 0 | 0 | 2 | 1 | 1 | 0 | 0 | 2   | 0 | ?  | ?   | ?  | ?  | ?  | ?  |
| <b>Denticeps_clupeoides</b>           | 0 | 0 | 0 | 0 | 1 | 0 | 1 | 1   | 1 | 1  | 0   | -  | 1  | 1  | 1  |
| <b>Diplomystus_dentatus</b>           | 0 | 0 | 2 | 1 | 1 | 0 | 0 | 0&1 | 0 | 1  | 1&2 | ?  | 1  | 1  | 1  |
| <b>Domeykos_profetaensis</b>          | ? | 0 | 2 | ? | 1 | 0 | 1 | 2   | 0 | ?  | ?   | ?  | 1  | ?  | ?  |
| <b>Dorsetichthys_bechei</b>           | 0 | 0 | 0 | 1 | 0 | - | 0 | 0   | 0 | 0  | 1   | ?  | 0  | 0  | 0  |
| <b>Engraulis_ringens</b>              | ? | 0 | 2 | ? | 1 | 0 | 1 | 1   | 1 | 1  | 0   | -  | 1  | 1  | 1  |
| <b>Elops_saurus</b>                   | 0 | 0 | 2 | 1 | 1 | 0 | 0 | 0   | 0 | 0  | 2   | 0  | 1  | 1  | 1  |
| <b>Erichalcis_arcta</b>               | 0 | 0 | 2 | 1 | 1 | 0 | 0 | 0&1 | 0 | 1  | ?   | ?  | ?  | ?  | ?  |
| <b>Esox_lucius</b>                    | 0 | 0 | ? | ? | 1 | ? | 1 | ?   | 0 | 0  | ?   | ?  | 1  | 1  | 1  |
| <b>Eurycormus_speciosus</b>           | ? | 1 | ? | 1 | 0 | - | ? | 0   | ? | ?  | ?   | ?  | ?  | ?  | ?  |
| <b>Gordichthys_conquensis</b>         | ? | 0 | 0 | ? | 1 | 0 | 1 | ?   | 0 | ?  | ?   | ?  | ?  | ?  | ?  |

| Taxon / Character number            | 1 | 2 | 3 | 4 | 5 | 6 | 7 | 8   | 9 | 10 | 11 | 12 | 13 | 14 | 15 |
|-------------------------------------|---|---|---|---|---|---|---|-----|---|----|----|----|----|----|----|
| <b>Goulmimichthys_arambourgi</b>    | 1 | 0 | 2 | ? | 1 | 1 | 1 | 2   | 0 | ?  | 2  | 1  | 1  | 1  | ?  |
| <b>Hiodon_alosoides</b>             | 1 | 1 | 3 | 1 | 1 | 2 | 0 | 3   | 0 | 0  | ?  | ?  | 1  | 1  | 1  |
| <b>Heterotis_niloticus</b>          | 0 | 1 | 0 | 0 | 1 | 0 | 0 | 1   | 0 | 0  | ?  | ?  | 1  | 1  | 1  |
| <b>Humbertia_operta</b>             | 0 | 0 | 0 | 1 | 1 | 0 | 0 | 0&1 | 0 | ?  | 2  | 2  | 1  | 1  | 1  |
| <b>Leptolepis_coryphaenoides</b>    | 0 | 0 | 2 | 1 | 1 | 0 | 0 | 0   | 0 | 0  | 2  | 0  | 0  | 0  | 0  |
| <b>Leptolepis_koonwarri</b>         | 0 | 0 | 2 | 1 | 1 | 0 | 0 | 0   | ? | ?  | ?  | ?  | ?  | ?  | ?  |
| <b>Leptolepides_haerteisi</b>       | 0 | 0 | ? | ? | ? | ? | 0 | 1   | 0 | ?  | ?  | ?  | ?  | ?  | ?  |
| <b>Leptolepides_sprattiformis</b>   | 0 | 0 | 2 | 1 | 1 | 0 | 0 | 1   | 0 | ?  | ?  | ?  | 1  | ?  | 1  |
| <b>Luisichthysvinalaensis</b>       | 1 | 0 | 2 | ? | 1 | 0 | 0 | 2   | 0 | ?  | 2  | 1  | 1  | 1  | 1  |
| <b>Luisiella_feruglioi</b>          | 0 | 0 | 2 | 1 | 1 | 0 | 0 | 0   | ? | ?  | ?  | ?  | ?  | ?  | ?  |
| <b>Lycoptera_middendorfi</b>        | 0 | 0 | 2 | 1 | 1 | 0 | 0 | 0   | 0 | ?  | ?  | ?  | ?  | ?  | ?  |
| <b>Megalops_atlanticus</b>          | 0 | 0 | 2 | 1 | 1 | 0 | 0 | 0   | 0 | 0  | 2  | 0  | 1  | 1  | 1  |
| <b>Notelops_brama</b>               | 1 | 0 | 2 | 1 | 1 | 1 | 0 | 2   | 0 | ?  | 2  | 1  | 1  | 1  | ?  |
| <b>Oncorhynchus_mykiss</b>          | 0 | 0 | 2 | 1 | 1 | 0 | ? | 1   | 0 | 0  | 2  | 2  | 1  | 1  | 1  |
| <b>Opsariichthys_bidens</b>         | 1 | ? | 0 | ? | 1 | 0 | 0 | ?   | 0 | 0  | 2  | 2  | 1  | 1  | 1  |
| <b>Orthogonikleithrus_hoelli</b>    | ? | 0 | ? | ? | 1 | ? | 0 | ?   | 0 | ?  | ?  | ?  | ?  | ?  | ?  |
| <b>Pachythrissops_propterus</b>     | ? | 0 | ? | ? | 1 | 0 | ? | 0   | 0 | ?  | ?  | ?  | ?  | ?  | ?  |
| <b>Pholidophorus_gervasutti</b>     | 0 | ? | 0 | 1 | 0 | - | 0 | ?   | ? | ?  | ?  | ?  | ?  | ?  | ?  |
| <b>Pholidophorus_latusculus</b>     | ? | ? | ? | 1 | ? | ? | 0 | ?   | ? | ?  | ?  | ?  | ?  | ?  | ?  |
| <b>Protoclupea_chilensis</b>        | 0 | 0 | ? | 1 | 1 | ? | 0 | 2   | 0 | ?  | ?  | ?  | ?  | ?  | ?  |
| <b>Rhacolepis_buccalis</b>          | 1 | 0 | 2 | 1 | 1 | 1 | 1 | 2   | 0 | ?  | 2  | 1  | 1  | 1  | ?  |
| <b>Santanaclupea_silvasantosi</b>   | 0 | 0 | ? | ? | 1 | 0 | 1 | ?   | 1 | 1  | ?  | ?  | 2  | 2  | ?  |
| <b>Siemensichthys_macrocephalus</b> | 0 | 0 | 1 | 1 | 1 | ? | 0 | ?   | ? | ?  | 1  | 0  | 0  | 0  | 0  |
| <b>Siemensichthys_siemensii</b>     | 0 | 0 | ? | 1 | ? | ? | ? | ?   | ? | ?  | ?  | ?  | ?  | ?  | ?  |
| <b>Tharrhias_araripis_</b>          | 0 | 0 | 2 | 1 | 1 | 3 | 1 | 1   | 0 | ?  | ?  | ?  | ?  | ?  | ?  |
| <b>Tharsis_dubius</b>               | 0 | 0 | 2 | 1 | 1 | 0 | 0 | 0   | 0 | 0  | 2  | 0  | 1  | 0  | 1  |
| <b>Thrissops_formosus</b>           | ? | 0 | 2 | ? | 1 | 2 | 0 | 1   | 0 | ?  | ?  | ?  | ?  | ?  | ?  |
| <b>Thymallus_thymallus</b>          | 0 | 0 | 2 | 1 | 1 | 0 | 0 | 1   | 0 | 0  | 2  | 2  | 1  | 1  | 1  |
| <b>Umbra_krameri</b>                | 0 | 0 | - | - | 1 | 0 | 1 | ?   | 0 | 0  | 2  | 2  | 1  | 1  | 1  |
| <b>Varasichthys_ariasi</b>          | 0 | 0 | 2 | 1 | 1 | 0 | 0 | 2   | 0 | ?  | ?  | ?  | 1  | 1  | 1  |

| Taxon / Character number              | 16 | 17 | 18 | 19 | 20 | 21 | 22 | 23 | 24 | 25 | 26 | 27 | 28 |
|---------------------------------------|----|----|----|----|----|----|----|----|----|----|----|----|----|
| <b>Amia_calva</b>                     | 2  | 1  | 0  | 0  | 0  | 0  | 0  | 0  | 0  | 1  | 0  | 1  | 0  |
| <b>Amia_pattersoni</b>                | ?  | ?  | 0  | 0  | 0  | ?  | 0  | 0  | 0  | 1  | 0  | 1  | 0  |
| <b>Lepisosteus_osseus</b>             | ?  | 2  | 0  | 0  | 0  | 2  | 0  | 1  | 0  | 1  | 0  | 1  | 1  |
| <b>Obaichthys_decoratus</b>           | ?  | 1  | 0  | 0  | ?  | 2  | 0  | 1  | 0  | 0  | 0  | 1  | 1  |
| <b>Aspidorhynchus_acutirostris</b>    | ?  | 1  | 0  | 0  | ?  | ?  | 1  | 0  | 0  | 1  | 0  | 1  | 0  |
| <b>Belonostomus_tenuirostris</b>      | ?  | ?  | 0  | 0  | 0  | ?  | 1  | ?  | ?  | 1  | 0  | 1  | 0  |
| <b>Hypsocormus_macrodon</b>           | ?  | 1  | 0  | 0  | ?  | ?  | 0  | 0  | 1  | ?  | ?  | 1  | 0  |
| <b>Mesturus_verrucosus</b>            | ?  | ?  | 0  | 0  | 1  | 2  | 1  | 0  | 0  | 0  | 1  | 0  | 1  |
| <b>Pachycormus_macropterus</b>        | 1  | 1  | 0  | 0  | ?  | ?  | 0  | 0  | 1  | 1  | 0  | 1  | 0  |
| <b>Vinctifer_comptoni</b>             | ?  | ?  | 0  | 0  | ?  | ?  | 1  | 0  | 0  | 0  | 0  | 1  | 0  |
| <b>Apsopelix_anglicus</b>             | 2  | ?  | 0  | 0  | 1  | ?  | 1  | 0  | ?  | 0  | 2  | ?  | 0  |
| <b>Allothrissops_mesogaster</b>       | ?  | 0  | 1  | 0  | 1  | ?  | 1  | ?  | 0  | 1  | 0  | 0  | 0  |
| <b>Anaethalion_angustus</b>           | ?  | 0  | 0  | 0  | 0  | 0  | 1  | 0  | 0  | 1  | 0  | 1  | 0  |
| <b>Anaethalion_knorri</b>             | ?  | ?  | 0  | 0  | 0  | ?  | 1  | 0  | 0  | ?  | 0  | 1  | 0  |
| <b>Ascalabos_voithii</b>              | ?  | ?  | 0  | 0  | ?  | ?  | 1  | ?  | 0  | ?  | 0  | ?  | 0  |
| <b>Bavarichthys_incognitus</b>        | ?  | ?  | 0  | 0  | ?  | ?  | ?  | ?  | 0  | 0  | ?  | ?  | 0  |
| <b>Cavenderichthys_talbragarensis</b> | ?  | ?  | 0  | 0  | ?  | ?  | 1  | ?  | 0  | ?  | ?  | ?  | 0  |
| <b>Brycon_meeki</b>                   | 2  | 0  | 0  | 0  | 1  | 1  | 1  | 1  | 0  | 0  | 0  | ?  | 0  |
| <b>Chanos_chanos</b>                  | 2  | 0  | 0  | 0  | 1  | 1  | 1  | 1  | 0  | 0  | 0  | ?  | 0  |
| <b>Chongichthys_dentatus</b>          | 2  | ?  | ?  | ?  | ?  | ?  | ?  | 0  | 0  | 0  | 0  | ?  | 0  |
| <b>Crossognathus_sabaudians</b>       | ?  | ?  | 0  | 0  | 1  | ?  | ?  | 0  | 0  | 0  | ?  | ?  | 0  |
| <b>Denticeps_clupeoides</b>           | 2  | 1  | 0  | 0  | 0  | 1  | 1  | 0  | 1  | 0  | 0  | 1  | 0  |
| <b>Diplomystus_dentatus</b>           | 2  | 0  | 0  | 0  | ?  | ?  | 1  | ?  | 0  | 0  | 0  | 0  | 0  |
| <b>Domeykos_profetaensis</b>          | ?  | ?  | 0  | 0  | ?  | ?  | 1  | ?  | 0  | 0  | 0  | ?  | 0  |
| <b>Dorsetichthys_bechei</b>           | 0  | 0  | 0  | 0  | 0  | 0  | 1  | 0  | 0  | 1  | 0  | 0  | 0  |
| <b>Engraulis_ringens</b>              | 2  | 0  | 0  | 0  | 0  | 1  | 1  | 0  | 0  | 0  | 0  | 1  | 0  |
| <b>Elops_saurus</b>                   | 2  | 0  | 0  | 0  | 0  | 0  | 1  | 0  | 0  | 1  | 0  | 1  | 0  |
| <b>Erichalcis_arcta</b>               | ?  | ?  | 0  | 0  | 1  | ?  | 1  | ?  | 0  | 0  | ?  | 0  | 0  |
| <b>Esox_lucius</b>                    | 2  | 0  | 0  | 1  | 0  | 1  | 1  | 0  | 0  | 0  | 0  | ?  | 0  |
| <b>Eurycormus_speciosus</b>           | ?  | ?  | 0  | 0  | ?  | ?  | 1  | ?  | 0  | 0  | 0  | ?  | 0  |
| <b>Gordichthys_conquensis</b>         | ?  | ?  | 0  | 0  | 1  | ?  | 1  | 1  | 0  | 1  | ?  | ?  | 0  |

| <b>Taxon / Character number</b>     | <b>16</b> | <b>17</b> | <b>18</b> | <b>19</b> | <b>20</b> | <b>21</b> | <b>22</b> | <b>23</b> | <b>24</b> | <b>25</b> | <b>26</b> | <b>27</b> | <b>28</b> |
|-------------------------------------|-----------|-----------|-----------|-----------|-----------|-----------|-----------|-----------|-----------|-----------|-----------|-----------|-----------|
| <b>Goulmimichthys_arambourgi</b>    | 2         | 0         | 0         | 0         | 0         | ?         | 1         | ?         | 0         | 0         | 1         | ?         | 0         |
| <b>Hiodon_alosoides</b>             | 1         | 0         | 0         | 0         | 0         | 2         | 1         | 0         | 1         | 2         | 0         | 1         | 0         |
| <b>Heterotis_niloticus</b>          | 2         | 1         | 0         | 0         | 0         | 2         | 1         | 1         | 0         | 0         | 0         | 0         | 0         |
| <b>Humbertia_operta</b>             | 2         | 0         | 0         | 0         | 0         | ?         | 1         | 0         | 1         | 0         | 0         | 0         | 0         |
| <b>Leptolepis_coryphaenoides</b>    | 0&1       | 0         | 0         | 0         | 0         | 0         | 1         | 0         | 0         | 1         | 0         | 0         | 0         |
| <b>Leptolepis_koonwarri</b>         | ?         | ?         | 0         | 0         | ?         | ?         | 1         | ?         | 0         | ?         | ?         | ?         | 0         |
| <b>Leptolepides_haerteisi</b>       | ?         | ?         | 0         | 0         | ?         | ?         | ?         | 0         | 1         | 1         | 0         | ?         | 0         |
| <b>Leptolepides_sprattiformis</b>   | 2         | ?         | 0         | 0         | 1         | ?         | 1         | 0         | 0         | 1         | 0         | ?         | 0         |
| <b>Luisichthysvinalaensis</b>       | 2         | ?         | 0         | 0         | ?         | ?         | 1         | ?         | 0         | ?         | 0         | ?         | 0         |
| <b>Luisiella_feruglioi</b>          | ?         | ?         | 0         | 0         | ?         | ?         | 1         | ?         | 0         | ?         | ?         | ?         | 0         |
| <b>Lycoptera_middendorfi</b>        | ?         | ?         | 0         | 0         | 0         | ?         | 1         | 0         | 0         | 2         | 0         | 1         | 0         |
| <b>Megalops_atlanticus</b>          | 2         | 0         | 0         | 0         | 0         | 0         | 1         | 0         | 0         | 1         | 0         | 1         | 0         |
| <b>Notelops_brama</b>               | 2         | 0         | 0         | 0         | 0         | ?         | ?         | 0         | 0         | 0         | 1         | ?         | 0         |
| <b>Oncorhynchus_mykiss</b>          | 2         | 0         | 0         | 0         | 0         | 1         | 1         | 0         | 1         | 0         | 0         | ?         | 0         |
| <b>Opsariichthys_bidens</b>         | 2         | 0         | 0         | 0         | 1         | 1         | 1         | 1         | 1         | 0         | 0         | 1         | 0         |
| <b>Orthogonikleithrus_hoelli</b>    | ?         | ?         | 0         | 0         | 1         | ?         | ?         | 0         | 1         | 0         | 0         | 1         | 0         |
| <b>Pachythrissops_propterus</b>     | ?         | ?         | 0         | 0         | 0         | ?         | ?         | ?         | 0         | 1         | 0         | ?         | 0         |
| <b>Pholidophorus_gervasutti</b>     | ?         | ?         | ?         | ?         | ?         | ?         | ?         | ?         | ?         | ?         | ?         | ?         | 0         |
| <b>Pholidophorus_latiusculus</b>    | ?         | ?         | ?         | ?         | ?         | ?         | ?         | ?         | ?         | ?         | ?         | ?         | 0         |
| <b>Protoclupea_chilensis</b>        | ?         | ?         | ?         | ?         | ?         | ?         | ?         | ?         | 0         | 0         | 0         | ?         | 0         |
| <b>Rhacolepis_buccalis</b>          | 2         | 0         | 0         | 0         | 1         | ?         | 1         | 0         | 0         | 0         | 1         | ?         | 0         |
| <b>Santanaclupea_silvasantosi</b>   | ?         | 0         | 0         | 0         | ?         | ?         | 1         | ?         | 0         | 0         | 0         | ?         | 0         |
| <b>Siemensichthys_macrocephalus</b> | 1         | ?         | 0         | 0         | 0         | 0         | 1         | ?         | 0         | 0         | 0         | ?         | 0         |
| <b>Siemensichthys_siemensii</b>     | ?         | ?         | 0         | 0         | 0         | ?         | ?         | ?         | ?         | ?         | ?         | ?         | 0         |
| <b>Tharrhias_araripis_</b>          | ?         | ?         | 0         | 0         | ?         | ?         | 1         | 1         | 0         | ?         | ?         | 0         | 0         |
| <b>Tharsis_dubius</b>               | 2         | 0         | 0         | 0         | 0         | 0         | 1         | 0         | 0         | 0         | 0         | 0         | 0         |
| <b>Thrissops_formosus</b>           | 2         | ?         | 1         | 0         | ?         | ?         | ?         | 0         | 0         | ?         | 0         | 0         | 0         |
| <b>Thymallus_thymallus</b>          | 2         | 0         | 0         | 0         | 0         | 1         | 1         | 0         | ?         | 0         | 0         | 1         | 0         |
| <b>Umbra_krameri</b>                | 2         | 0         | 0         | 1         | 0         | 1         | 1         | ?         | 0         | 0         | 0         | 1         | 0         |
| <b>Varasichthys_ariasi</b>          | 2         | ?         | 0         | 0         | ?         | ?         | ?         | 0         | 0         | 0         | 2         | ?         | 0         |

| Taxon / Character number              | 29 | 30  | 31 | 32  | 33  | 34 | 35 | 36 | 37  | 38 | 39 | 40 |
|---------------------------------------|----|-----|----|-----|-----|----|----|----|-----|----|----|----|
| <b>Amia_calva</b>                     | 0  | 0&1 | 0  | 3   | 2   | -  | 0  | 0  | 0   | 2  | 0  | 0  |
| <b>Amia_pattersoni</b>                | 0  | 0   | 0  | 3   | 2   | -  | 0  | 0  | 0   | ?  | 0  | 0  |
| <b>Lepisosteus_osseus</b>             | 0  | 0   | 1  | 0   | 0   | 0  | 0  | 0  | 0   | 2  | ?  | 0  |
| <b>Obaichthys_decoratus</b>           | 0  | 0   | 1  | 0   | 0   | 0  | 0  | ?  | ?   | ?  | ?  | 0  |
| <b>Aspidorhynchus_acutirostris</b>    | ?  | 0   | 0  | 1   | 1   | 0  | 0  | 0  | 0   | 0  | 1  | 0  |
| <b>Belonostomus_tenuirostris</b>      | ?  | 0   | 0  | 1   | 1   | 0  | 0  | ?  | -   | -  | 0  | 0  |
| <b>Hypsocormus_macrodon</b>           | 0  | 0   | 0  | 1   | 2   | -  | 0  | 0  | 0&1 | 1  | 0  | 0  |
| <b>Mesturus_verrucosus</b>            | ?  | ?   | 0  | 3   | 2   | -  | 0  | ?  | -   | -  | 0  | ?  |
| <b>Pachycormus_macropterus</b>        | 0  | 0   | 0  | 1   | 2   | -  | 0  | 0  | 0   | 1  | 0  | 0  |
| <b>Vinctifer_comptoni</b>             | ?  | 0   | 0  | 1   | 1   | 0  | 0  | 1  | -   | -  | 0  | 0  |
| <b>Apsopelix_anglicus</b>             | ?  | 1   | 1  | 3   | 0&1 | 1  | 1  | ?  | ?   | 0  | 1  | ?  |
| <b>Allothrissops_mesogaster</b>       | ?  | 0   | 1  | 3   | 1   | 0  | 1  | ?  | 1   | 0  | 1  | 1  |
| <b>Anaethalion_angustus</b>           | 0  | 0   | 0  | 3   | 1   | 0  | ?  | 0  | 0   | 0  | 0  | ?  |
| <b>Anaethalion_knorri</b>             | 0  | 0   | 0  | 3   | 1   | 0  | 0  | 0  | 0   | 0  | 0  | ?  |
| <b>Ascalabos_voithii</b>              | ?  | 0   | 0  | 3   | ?   | ?  | 0  | ?  | ?   | ?  | 0  | 0  |
| <b>Bavarichthys_incognitus</b>        | 0  | 1   | ?  | 3   | 1   | 1  | ?  | 1  | -   | -  | 1  | ?  |
| <b>Cavenderichthys_talbragarensis</b> | 0  | 0   | 0  | 3   | 1   | 0  | 0  | 0  | 0   | 0  | 0  | 1  |
| <b>Brycon_meeki</b>                   | 0  | 0   | 0  | 3   | 1   | 0  | ?  | 0  | 1   | 0  | 0  | 0  |
| <b>Chanos_chanos</b>                  | 0  | 0   | 0  | 3   | 1   | 0  | 0  | 0  | 1   | 0  | 1  | 0  |
| <b>Chongichthys_dentatus</b>          | ?  | 1   | ?  | ?   | ?   | ?  | ?  | ?  | ?   | ?  | 1  | 0  |
| <b>Crossognathus_sabaudians</b>       | 0  | 1   | 1  | 3   | 1   | 1  | 1  | 1  | -   | -  | 1  | ?  |
| <b>Denticeps_clupeoides</b>           | ?  | 0   | 0  | 3   | 1   | 0  | 0  | 0  | 1   | 0  | 0  | 0  |
| <b>Diplomystus_dentatus</b>           | ?  | 0   | 0  | 3   | 1   | 0  | 0  | 0  | 1   | 0  | 0  | 0  |
| <b>Domeykos_profetaensis</b>          | ?  | ?   | ?  | ?   | ?   | ?  | ?  | ?  | ?   | ?  | ?  | ?  |
| <b>Dorsetichthys_bechei</b>           | 0  | 0   | 0  | 2   | 0   | 0  | 0  | 0  | 0   | 0  | 0  | 0  |
| <b>Engraulis_ringens</b>              | 0  | 0   | 0  | 3   | 2   | -  | 0  | 0  | 1   | 0  | 0  | 0  |
| <b>Elops_saurus</b>                   | ?  | 0   | 1  | 3   | 1   | 0  | 1  | 0  | 0   | 0  | 1  | 0  |
| <b>Erichalcis_arcta</b>               | ?  | 0   | 0  | 3   | 1   | 0  | 0  | 0  | 1   | 2  | ?  | 0  |
| <b>Esox_lucius</b>                    | ?  | 0   | 0  | 3   | 1   | 0  | 0  | 0  | 1   | 0  | 0  | 0  |
| <b>Eurycormus_speciosus</b>           | 0  | 0   | 0  | 1&2 | 0   | 0  | 0  | 0  | 0   | 1  | 0  | 0  |
| <b>Gordichthys_conquensis</b>         | ?  | 0   | 0  | 3   | 1   | 0  | 0  | 0  | 0   | ?  | 0  | ?  |

| Taxon / Character number            | 29 | 30  | 31 | 32  | 33  | 34 | 35 | 36 | 37  | 38 | 39 | 40 |
|-------------------------------------|----|-----|----|-----|-----|----|----|----|-----|----|----|----|
| <b>Goulmimichthys_arambourgi</b>    | ?  | 0   | 1  | 3   | 1   | 1  | 1  | 1  | -   | -  | 1  | 0  |
| <b>Hiodon_alosoides</b>             | 1  | 1   | 0  | 3   | 2   | -  | 0  | 1  | -   | -  | 0  | 0  |
| <b>Heterotis_niloticus</b>          | 0  | 1   | 0  | 3   | 2   | -  | 0  | 1  | -   | -  | 0  | 0  |
| <b>Humbertia_operta</b>             | ?  | 0   | 0  | 3   | 1   | 0  | 0  | 0  | 1   | 2  | 0  | 0  |
| <b>Leptolepis_coryphaenoides</b>    | 0  | 0   | 0  | 2   | 0   | 0  | 0  | 0  | 0   | 0  | 0  | 1  |
| <b>Leptolepis_koonwarri</b>         | 0  | 0   | 0  | 3   | 1   | 0  | 0  | 0  | 0&1 | ?  | 0  | 1  |
| <b>Leptolepides_haerteisi</b>       | 0  | 0   | 0  | 3   | 0   | 1  | 0  | 0  | 1   | 2  | 0  | 0  |
| <b>Leptolepides_sprattiformis</b>   | 0  | 0   | 0  | 3   | 1   | 1  | 0  | 0  | 1   | 2  | 0  | 0  |
| <b>Luisichthysvinalaensis</b>       | ?  | 0   | ?  | ?   | ?   | ?  | ?  | 0  | 0   | ?  | 0  | ?  |
| <b>Luisiella_feruglioi</b>          | 0  | 0   | 0  | 3   | 1   | 0  | 0  | 0  | 0   | 0  | 0  | 1  |
| <b>Lycoptera_middendorfi</b>        | 1  | 0   | 0  | 3   | 2   | -  | 0  | 0  | 1   | 0  | 0  | 0  |
| <b>Megalops_atlanticus</b>          | ?  | 0   | 1  | 3   | 1   | 0  | 0  | 0  | 0   | 0  | 1  | 0  |
| <b>Notelops_brama</b>               | 0  | 1   | 1  | 3   | 1   | 1  | 1  | 1  | -   | -  | 1  | 0  |
| <b>Oncorhynchus_mykiss</b>          | 0  | 0   | 0  | 3   | 1   | 0  | 0  | 0  | 1   | 0  | 0  | 0  |
| <b>Opsariichthys_bidens</b>         | 0  | 0   | 0  | 3   | 1   | 0  | 0  | 0  | 1   | 0  | 0  | 0  |
| <b>Orthogonikleithrus_hoelli</b>    | 0  | 0   | 0  | 3   | 1   | ?  | 0  | ?  | ?   | ?  | 0  | 0  |
| <b>Pachythrissops_propterus</b>     | 0  | 0   | ?  | 3   | 1   | 0  | 0  | ?  | ?   | ?  | 0  | ?  |
| <b>Pholidophorus_gervasutti</b>     | 0  | 0   | 0  | 1&2 | 0&1 | ?  | 0  | 0  | 0   | ?  | ?  | 0  |
| <b>Pholidophorus_latiusculus</b>    | 0  | 0   | ?  | 2   | 0   | 0  | 0  | ?  | ?   | ?  | 0  | ?  |
| <b>Protoclupea_chilensis</b>        | 0  | 0   | ?  | 3   | ?   | 0  | ?  | 0  | 0   | 0  | 0  | 0  |
| <b>Rhacolepis_buccalis</b>          | 0  | 0   | 1  | 3   | 1   | 1  | 1  | 1  | -   | -  | 1  | 0  |
| <b>Santanaclupea_silvasantosi</b>   | ?  | ?   | ?  | 3   | ?   | ?  | ?  | ?  | ?   | ?  | ?  | 0  |
| <b>Siemensichthys_macrocephalus</b> | 0  | 0&1 | 0  | 3   | 1   | 0  | ?  | ?  | ?   | ?  | 0  | ?  |
| <b>Siemensichthys_siemensii</b>     | 0  | ?   | ?  | 3   | ?   | ?  | ?  | 0  | 0   | ?  | 0  | ?  |
| <b>Tharrhias_araripis_</b>          | 0  | 0   | 0  | 3   | 1   | 0  | 1  | 0  | 1   | 0  | 0  | 0  |
| <b>Tharsis_dubius</b>               | ?  | ?   | 0  | 3   | 1   | 0  | 0  | 0  | 0   | 0  | ?  | 1  |
| <b>Thrissops_formosus</b>           | ?  | 0   | 1  | 3   | 1   | 0  | 1  | 0  | 1   | 0  | 0  | ?  |
| <b>Thymallus_thymallus</b>          | ?  | 0   | 0  | 3   | 1   | 0  | 0  | 0  | 0   | 0  | 0  | 0  |
| <b>Umbra_krameri</b>                | ?  | 0   | ?  | 3   | 1   | 0  | 0  | 0  | 1   | -  | 0  | 0  |
| <b>Varasichthys_ariasi</b>          | ?  | 0   | ?  | 2   | 1   | 0  | ?  | 0  | 0   | 0  | 0  | 0  |

| Taxon / Character number              | 41 | 42 | 43 | 44 | 45 | 46 | 47 | 48 | 49 | 50 | 51 | 52  |
|---------------------------------------|----|----|----|----|----|----|----|----|----|----|----|-----|
| <b>Amia_calva</b>                     | 0  | 0  | 0  | 3  | 0  | 0  | 1  | 1  | 0  | 0  | 0  | 0   |
| <b>Amia_pattersoni</b>                | 0  | ?  | 0  | 3  | 0  | 0  | 1  | ?  | 0  | 0  | 0  | 0   |
| <b>Lepisosteus_osseus</b>             | 4  | 0  | 0  | 0  | 1  | 1  | 0  | 1  | 0  | 0  | 0  | 1   |
| <b>Obaichthys_decoratus</b>           | 4  | 0  | 0  | 0  | ?  | 1  | 0  | 1  | 0  | ?  | 0  | 1   |
| <b>Aspidorhynchus_acutirostris</b>    | 0  | 0  | 0  | 0  | 1  | 1  | 1  | 1  | 0  | 0  | 0  | 1   |
| <b>Belonostomus_tenuirostris</b>      | 0  | 0  | 0  | 0  | 1  | 1  | ?  | 1  | 0  | 0  | ?  | 1   |
| <b>Hypsocormus_macrodon</b>           | 0  | 0  | 0  | 0  | 1  | 1  | 1  | 1  | 0  | ?  | ?  | 0   |
| <b>Mesturus_verrucosus</b>            | ?  | 0  | ?  | 0  | 0  | ?  | 1  | 1  | 0  | ?  | 0  | 1   |
| <b>Pachycormus_macropterus</b>        | 0  | 0  | 0  | 0  | 1  | 1  | 1  | 1  | 0  | ?  | ?  | 0   |
| <b>Vinctifer_comptoni</b>             | 0  | 0  | 0  | 0  | 0  | 1  | ?  | 1  | 0  | 0  | 0  | 1   |
| <b>Apsopelix_anglicus</b>             | 0  | 0  | 1  | 1  | 1  | 0  | ?  | ?  | ?  | ?  | ?  | 1   |
| <b>Allothrissops_mesogaster</b>       | 0  | 0  | 1  | 0  | 1  | 0  | 0  | 0  | 1  | ?  | 1  | 1   |
| <b>Anaethalion_angustus</b>           | 0  | ?  | 1  | 3  | 1  | 0  | 0  | 0  | 1  | ?  | 1  | 0   |
| <b>Anaethalion_knorri</b>             | 0  | ?  | 1  | 0  | 1  | 0  | 0  | 0  | ?  | ?  | 1  | ?   |
| <b>Ascalabos_voithii</b>              | 0  | 0  | 1  | 0  | 1  | 0  | 0  | 0  | 1  | ?  | 1  | 1   |
| <b>Bavarichthys_incognitus</b>        | 0  | 0  | ?  | ?  | 1  | 0  | ?  | ?  | ?  | ?  | ?  | 1   |
| <b>Cavenderichthys_talbragarensis</b> | 0  | 0  | 1  | 0  | 1  | 0  | 0  | 0  | 1  | ?  | 1  | 0   |
| <b>Brycon_meeki</b>                   | 1  | 0  | 1  | 4  | 1  | 1  | 1  | 1  | 1  | ?  | 1  | 1   |
| <b>Chanos_chanos</b>                  | 1  | 0  | 1  | 0  | 1  | 0  | ?  | ?  | 1  | 2  | 1  | 1   |
| <b>Chongichthys_dentatus</b>          | 0  | 1  | 1  | 0  | 1  | ?  | 0  | ?  | ?  | ?  | ?  | 1   |
| <b>Crossognathus_sabaudians</b>       | 0  | ?  | ?  | ?  | 1  | ?  | ?  | ?  | ?  | ?  | ?  | 0&1 |
| <b>Denticeps_clupeoides</b>           | 0  | 1  | 1  | 3  | 1  | 1  | 0  | 1  | 1  | 2  | 1  | 1   |
| <b>Diplomystus_dentatus</b>           | 0  | ?  | 1  | ?  | 1  | 0  | 0  | 0  | ?  | ?  | ?  | 1   |
| <b>Domeykos_profetaensis</b>          | 0  | ?  | 1  | 1  | 1  | 0  | ?  | ?  | ?  | ?  | ?  | 1   |
| <b>Dorsetichthys_bechei</b>           | 0  | ?  | 1  | 0  | 1  | 1  | ?  | 1  | ?  | ?  | -  | 0   |
| <b>Engraulis_ringens</b>              | 3  | 1  | 1  | 0  | 1  | 0  | 1  | 1  | 1  | 2  | 1  | 1   |
| <b>Elops_saurus</b>                   | 0  | 1  | 1  | 2  | 1  | 0  | 0  | 1  | 1  | 1  | 1  | 0   |
| <b>Erichalcis_arcta</b>               | 0  | 0  | 1  | 0  | 1  | 0  | 0  | 0  | 1  | ?  | ?  | 1   |
| <b>Esox_lucius</b>                    | 0  | ?  | 1  | 3  | 1  | ?  | 0  | ?  | 1  | 2  | 1  | 1   |
| <b>Eurycormus_speciosus</b>           | ?  | ?  | 1  | ?  | 1  | 0  | ?  | ?  | ?  | ?  | ?  | 0   |
| <b>Gordichthys_conquensis</b>         | 1  | 1  | 1  | 0  | 1  | 0  | 1  | ?  | ?  | ?  | ?  | 1   |



| Taxon / Character number            | 41 | 42 | 43 | 44 | 45  | 46 | 47 | 48 | 49  | 50  | 51 | 52 |
|-------------------------------------|----|----|----|----|-----|----|----|----|-----|-----|----|----|
| <b>Goulmimichthys_arambourgi</b>    | 0  | 0  | 1  | 2  | 1   | 0  | 0  | 0  | ?   | ?   | 1  | 1  |
| <b>Hiodon_alosoides</b>             | 0  | 1  | 1  | 3  | 1   | 0  | 0  | 1  | 1   | 1   | 1  | 1  |
| <b>Heterotis_niloticus</b>          | 0  | 1  | 1  | 0  | 1   | 1  | 0  | 1  | 0   | 1   | 1  | 1  |
| <b>Humbertia_operta</b>             | 0  | 0  | 1  | 0  | 1   | 0  | 0  | 0  | 1   | ?   | 1  | 1  |
| <b>Leptolepis_coryphaenoides</b>    | 0  | 0  | 1  | ?  | 1   | 0  | ?  | ?  | 1   | ?   | 1  | 0  |
| <b>Leptolepis_koonwarri</b>         | 0  | 0  | 1  | 0  | 1   | 0  | 0  | 0  | 0&1 | ?   | ?  | 0  |
| <b>Leptolepides_haerteisi</b>       | 2  | 0  | 1  | 0  | ?   | 0  | ?  | ?  | ?   | ?   | ?  | 0  |
| <b>Leptolepides_sprattiformis</b>   | 2  | 0  | 1  | 0  | 1   | 0  | 0  | 0  | 1   | ?   | 1  | 0  |
| <b>Luisichthysvinalaensis</b>       | 0  | ?  | 1  | ?  | 1   | ?  | ?  | ?  | ?   | ?   | ?  | 0  |
| <b>Luisiella_feruglioi</b>          | 0  | 0  | 1  | 0  | 1   | 0  | 0  | 0  | 1   | 1&2 | 1  | 0  |
| <b>Lycoptera_middendorfi</b>        | 0  | 0  | 1  | ?  | 1   | 0  | 0  | 1  | 0&1 | ?   | ?  | 0  |
| <b>Megalops_atlanticus</b>          | 0  | 0  | 1  | 1  | 1   | 0  | ?  | 1  | 1   | 1   | 1  | 0  |
| <b>Notelops_brama</b>               | 0  | 0  | 1  | 2  | 1   | 1  | 0  | 0  | 1   | ?   | 1  | 0  |
| <b>Oncorhynchus_mykiss</b>          | 0  | 1  | 1  | 0  | 1   | ?  | 0  | ?  | 1   | 2   | 1  | 1  |
| <b>Opsariichthys_bidens</b>         | 1  | 1  | 1  | 4  | 1   | ?  | ?  | ?  | 1   | 2   | 1  | 1  |
| <b>Orthogonikleithrus_hoelli</b>    | 2  | 0  | 1  | 0  | 1   | 0  | 0  | 0  | 1   | ?   | 1  | 1  |
| <b>Pachythrissops_properus</b>      | 0  | 0  | 1  | 0  | 1   | ?  | ?  | 0  | 1   | ?   | ?  | 0  |
| <b>Pholidophorus_gervasutti</b>     | ?  | 0  | 0  | 0  | 0&1 | ?  | ?  | 1  | 0   | ?   | ?  | 0  |
| <b>Pholidophorus_latiusculus</b>    | 0  | ?  | ?  | ?  | ?   | ?  | ?  | ?  | ?   | ?   | ?  | 0  |
| <b>Protoclupea_chilensis</b>        | 0  | 0  | 1  | 0  | 1   | 0  | ?  | ?  | ?   | ?   | ?  | 1  |
| <b>Rhacolepis_buccalis</b>          | 0  | 0  | 1  | 1  | 1   | 0  | ?  | 0  | 1   | ?   | 1  | 1  |
| <b>Santanaclupea_silvasantosi</b>   | 3  | 1  | 1  | 1  | 1   | ?  | ?  | 0  | 1   | 2   | 1  | 1  |
| <b>Siemensichthys_macrocephalus</b> | 0  | ?  | 1  | ?  | 1   | ?  | ?  | 1  | 1   | ?   | ?  | 0  |
| <b>Siemensichthys_siemensii</b>     | 0  | ?  | 1  | 0  | 1   | ?  | ?  | ?  | ?   | ?   | ?  | 0  |
| <b>Tharrhias_araripis_</b>          | 1  | 1  | 1  | 3  | 1   | 0  | ?  | ?  | 1   | ?   | 1  | ?  |
| <b>Tharsis_dubius</b>               | 0  | 0  | 1  | 0  | 1   | 0  | 0  | 0  | 1   | ?   | 1  | 0  |
| <b>Thrissops_formosus</b>           | 0  | 0  | 1  | 0  | 1   | 0  | 0  | 0  | 1   | ?   | 1  | 1  |
| <b>Thymallus_thymallus</b>          | 0  | 1  | 1  | 0  | 1   | ?  | 0  | ?  | 1   | 2   | 1  | 1  |
| <b>Umbra_krameri</b>                | 0  | 0  | 1  | 0  | 1   | 0  | 1  | 1  | 1   | 2   | 1  | 1  |
| <b>Varasichthys_ariasi</b>          | 0  | ?  | 1  | ?  | 1   | 0  | ?  | ?  | 1   | ?   | ?  | 0  |

| Taxon / Character number              | 53 | 54 | 55 | 56 | 57 | 58 | 59  | 60 | 61 | 62 | 63  | 64 |
|---------------------------------------|----|----|----|----|----|----|-----|----|----|----|-----|----|
| <b>Amia_calva</b>                     | 0  | 0  | 1  | 0  | 1  | 0  | 0   | 0  | 0  | 1  | 3   | 1  |
| <b>Amia_pattersoni</b>                | 0  | 0  | 1  | 0  | 1  | 0  | 0   | 0  | 0  | 1  | 3   | 1  |
| <b>Lepisosteus_osseus</b>             | 0  | 0  | 0  | 1  | 1  | 2  | 0   | 0  | -  | -  | -   | 1  |
| <b>Obaichthys_decoratus</b>           | 0  | 0  | 0  | 0  | 1  | 2  | ?   | 0  | -  | -  | -   | ?  |
| <b>Aspidorhynchus_acutirostris</b>    | 0  | 0  | 2  | 0  | 1  | 2  | ?   | 0  | 2  | 1  | 1   | 1  |
| <b>Belonostomus_tenuirostris</b>      | 0  | 0  | 2  | 1  | 1  | 2  | ?   | 0  | 0  | 1  | 1   | 1  |
| <b>Hypsocormus_macrodon</b>           | 0  | 0  | 0  | 0  | ?  | 3  | -   | 0  | 0  | 1  | 0&1 | 1  |
| <b>Mesturus_verrucosus</b>            | 0  | 0  | 2  | 1  | 0  | 0  | ?   | 1  | 2  | 0  | 0&1 | 2  |
| <b>Pachycormus_macropterus</b>        | 0  | 0  | 0  | 0  | ?  | 3  | -   | 0  | 0  | 1  | 0&1 | 1  |
| <b>Vinctifer_comptoni</b>             | 0  | 0  | 2  | 1  | 1  | 2  | ?   | 0  | 2  | 1  | 1   | 2  |
| <b>Apsopelix_anglicus</b>             | 0  | 1  | 0  | 0  | 0  | 0  | ?   | 0  | 0  | 0  | 1   | 0  |
| <b>Allothrissops_mesogaster</b>       | 0  | 1  | 0  | 0  | 0  | 0  | 1   | 0  | 1  | 0  | 1   | 0  |
| <b>Anaethalion_angustus</b>           | 0  | 0  | 0  | 0  | 0  | 0  | 0   | 0  | 1  | 0  | 1   | 0  |
| <b>Anaethalion_knorri</b>             | 0  | 0  | 0  | 0  | 0  | 0  | ?   | 0  | 1  | 0  | 1   | 0  |
| <b>Ascalabos_voithii</b>              | 0  | 0  | 0  | 0  | 0  | 0  | 0&1 | 0  | 1  | 0  | 1   | 0  |
| <b>Bavarichthys_incognitus</b>        | 0  | 0  | 2  | 0  | 0  | 0  | 0   | 0  | 2  | 0  | 1   | 0  |
| <b>Cavenderichthys_talbragarensis</b> | 0  | 0  | 0  | 0  | 0  | 0  | ?   | 0  | 1  | 0  | 1   | 0  |
| <b>Brycon_meeki</b>                   | 0  | 0  | 0  | 0  | ?  | 0  | 0&1 | 1  | 0  | 0  | 1   | 2  |
| <b>Chanos_chanos</b>                  | 1  | 0  | 0  | 0  | 1  | 0  | 0   | 1  | 1  | 2  | 1   | 2  |
| <b>Chongichthys_dentatus</b>          | 0  | 0  | ?  | 0  | ?  | ?  | ?   | 0  | 0  | 0  | 1   | ?  |
| <b>Crossognathus_sabaudians</b>       | 0  | 1  | 0  | 0  | 0  | 0  | 0   | 0  | 0  | 0  | 1   | ?  |
| <b>Denticeps_clupeoides</b>           | 0  | 0  | 0  | 0  | 0  | 0  | ?   | 0  | ?  | 1  | 2   | 2  |
| <b>Diplomystus_dentatus</b>           | 0  | 0  | 0  | 0  | 0  | 0  | 0&1 | 0  | 1  | 0  | 1   | 0  |
| <b>Domeykos_profetaensis</b>          | 0  | 1  | 2  | 0  | 0  | ?  | ?   | 0  | 1  | 0  | 1   | 0  |
| <b>Dorsetichthys_bechei</b>           | 0  | 0  | 2  | 0  | 0  | 0  | 0   | 0  | 1  | 0  | 1   | 0  |
| <b>Engraulis_ringens</b>              | 0  | 0  | 1  | 0  | ?  | ?  | ?   | 0  | 0  | 0  | 1   | 0  |
| <b>Elops_saurus</b>                   | 0  | 0  | 0  | 0  | 1  | 0  | 1   | 0  | 0  | 0  | 1   | 0  |
| <b>Erichalcis_arcta</b>               | 0  | 0  | 0  | 0  | 0  | 0  | 0   | 0  | 1  | 0  | 1   | 0  |
| <b>Esox_lucius</b>                    | 0  | 0  | 1  | 0  | 0  | 0  | 0   | 1  | 0  | 1  | 1   | 1  |
| <b>Eurycormus_speciosus</b>           | ?  | 0  | 2  | 0  | 1  | 0  | ?   | 0  | 1  | 0  | 1   | 0  |
| <b>Gordichthys_conquensis</b>         | 1  | 1  | 0  | 0  | 0  | 0  | 1   | 1  | 1  | 1  | 1   | 2  |

| Taxon / Character number            | 53  | 54 | 55 | 56 | 57 | 58 | 59 | 60 | 61  | 62 | 63  | 64 |
|-------------------------------------|-----|----|----|----|----|----|----|----|-----|----|-----|----|
| <b>Goulmimichthys_arambourgi</b>    | 0   | 1  | ?  | 0  | 0  | 0  | ?  | 0  | 0   | 0  | 1   | 1  |
| <b>Hiodon_alosoides</b>             | 0   | 0  | 0  | 0  | 1  | 0  | 0  | 0  | 0   | 1  | 1&2 | 2  |
| <b>Heterotis_niloticus</b>          | 0   | 0  | 0  | 0  | 1  | 1  | 0  | 0  | 0   | 1  | 1   | 2  |
| <b>Humbertia_operta</b>             | 0   | 0  | 0  | 0  | 0  | 0  | 1  | 0  | 1   | 0  | 1&2 | 0  |
| <b>Leptolepis_coryphaenoides</b>    | 0&1 | 0  | 0  | 0  | 0  | 0  | 0  | 0  | 1   | 0  | 1   | 0  |
| <b>Leptolepis_koonwarri</b>         | 0   | 0  | 0  | 0  | 0  | 0  | ?  | 1  | 1   | 0  | 1   | 0  |
| <b>Leptolepides_haerteisi</b>       | 0   | 0  | 0  | 0  | 0  | 0  | ?  | 0  | 1   | 0  | 1   | 0  |
| <b>Leptolepides_sprattiformis</b>   | 0   | 0  | 0  | 0  | 0  | 0  | 0  | 0  | 1   | 0  | 1   | 0  |
| <b>Luisichthysvinalaensis</b>       | 0   | 1  | 2  | 0  | 0  | 0  | 0  | 0  | 1   | 0  | 1   | 0  |
| <b>Luisiella_feruglioi</b>          | 0   | 0  | 0  | 0  | 0  | 0  | ?  | 0  | 1   | 0  | 1   | 0  |
| <b>Lycoptera_middendorfi</b>        | 0   | 0  | 2  | 0  | 1  | 0  | 0  | 0  | 0   | 0  | 1   | 1  |
| <b>Megalops_atlanticus</b>          | 0   | 0  | 0  | 0  | 0  | 0  | ?  | 0  | 1   | 0  | 1   | 0  |
| <b>Notelops_brama</b>               | 0   | 0  | 2  | 0  | 0  | 0  | ?  | 0  | 0   | 0  | 2   | 1  |
| <b>Oncorhynchus_mykiss</b>          | 1   | 0  | 0  | 0  | 1  | 0  | 0  | 0  | 2   | 0  | 1   | 1  |
| <b>Opsariichthys_bidens</b>         | 0   | 0  | 0  | 0  | 0  | 0  | 1  | 1  | 1   | 0  | 0   | 2  |
| <b>Orthogonikleithrus_hoelli</b>    | 0   | 0  | 0  | 0  | 0  | 0  | ?  | 0  | 1   | 0  | 1   | 0  |
| <b>Pachythrissops_properus</b>      | ?   | 0  | ?  | 0  | ?  | 0  | ?  | 0  | 1   | ?  | 1   | 0  |
| <b>Pholidophorus_gervasutti</b>     | ?   | 0  | 2  | 0  | 0  | ?  | 0  | 0  | 1   | 0  | 1&3 | 0  |
| <b>Pholidophorus_latiusculus</b>    | ?   | 0  | 2  | 0  | 0  | ?  | ?  | ?  | 1   | 0  | ?   | 0  |
| <b>Protoclupea_chilensis</b>        | 0   | 1  | 2  | 0  | 0  | ?  | ?  | 0  | 1   | 0  | ?   | ?  |
| <b>Rhacolepis_buccalis</b>          | 0   | 1  | 2  | 0  | 0  | 0  | 0  | 0  | 0   | 0  | 2   | 1  |
| <b>Santanaclupea_silvasantosi</b>   | 0   | ?  | ?  | 0  | 1  | 0  | ?  | 0  | ?   | ?  | 1   | ?  |
| <b>Siemensichthys_macrocephalus</b> | ?   | 0  | 2  | 0  | 0  | ?  | 1  | 0  | 1   | 0  | 2   | 1  |
| <b>Siemensichthys_siemensii</b>     | ?   | 0  | 2  | 0  | ?  | 0  | 1  | 0  | 1   | 0  | 1   | 1  |
| <b>Tharrhias_araripis_</b>          | 1   | 0  | 0  | 0  | 1  | 0  | 1  | 1  | ?   | 2  | 1   | 2  |
| <b>Tharsis_dubius</b>               | 0   | 0  | 0  | 0  | 0  | 0  | ?  | 0  | 1   | 0  | 1   | 0  |
| <b>Thrissops_formosus</b>           | 0   | 0  | 0  | 0  | 0  | 0  | 0  | 0  | 0&1 | 0  | 1   | 0  |
| <b>Thymallus_thymallus</b>          | 1   | 0  | 0  | 0  | 1  | 0  | 0  | 0  | 1   | 0  | 1   | ?  |
| <b>Umbra_krameri</b>                | 0   | 0  | 0  | 0  | 0  | 0  | 0  | 1  | 0   | 0  | 1   | 2  |
| <b>Varasichthys_ariasi</b>          | 0   | 1  | 2  | 0  | 0  | 0  | 0  | 0  | 1   | 0  | 1   | 1  |

| Taxon / Character number              | 65 | 66  | 67 | 68 | 69  | 70 | 71 | 72 | 73 | 74 | 75 | 76 |
|---------------------------------------|----|-----|----|----|-----|----|----|----|----|----|----|----|
| <b>Amia_calva</b>                     | 0  | 0   | 0  | 0  | 1   | 0  | 0  | 0  | 0  | 0  | 0  | 1  |
| <b>Amia_pattersoni</b>                | 0  | 0   | 0  | 0  | 1   | 0  | 0  | 0  | 0  | 0  | 0  | 1  |
| <b>Lepisosteus_osseus</b>             | 0  | 3   | 0  | 0  | 1   | 0  | 0  | 0  | 0  | 0  | 0  | 0  |
| <b>Obaichthys_decoratus</b>           | ?  | 3   | 0  | 0  | 1   | 0  | 0  | 0  | 0  | 0  | 0  | 0  |
| <b>Aspidorhynchus_acutirostris</b>    | 1  | 0   | 1  | 1  | -   | ?  | 0  | ?  | ?  | 0  | 0  | 1  |
| <b>Belonostomus_tenuirostris</b>      | 1  | 0   | 1  | 1  | -   | ?  | 0  | ?  | ?  | 0  | 0  | 1  |
| <b>Hypsocormus_macrodon</b>           | ?  | 0   | 0  | 1  | -   | ?  | ?  | ?  | 0  | 0  | 0  | 0  |
| <b>Mesturus_verrucosus</b>            | -  | 1&2 | 0  | 1  | -   | 1  | ?  | ?  | 0  | 0  | 0  | ?  |
| <b>Pachycormus_macropterus</b>        | 1  | 0   | 0  | 1  | -   | 0  | 0  | 0  | 0  | 0  | 0  | 0  |
| <b>Vinctifer_comptoni</b>             | -  | 0   | 1  | 0  | 0   | ?  | 0  | 0  | ?  | 0  | 0  | 1  |
| <b>Apsopelix_anglicus</b>             | 0  | 2   | 0  | 0  | ?   | 1  | 1  | 1  | 1  | 1  | 0  | 0  |
| <b>Allothrissops_mesogaster</b>       | 0  | 1   | 0  | 0  | 0   | 1  | 1  | 0  | 1  | 1  | 0  | 0  |
| <b>Anaethalion_angustus</b>           | 0  | 1   | 0  | 1  | -   | 1  | 1  | 1  | 1  | 1  | 0  | 0  |
| <b>Anaethalion_knorri</b>             | 0  | 1   | 0  | 1  | -   | 1  | 1  | 1  | 1  | 1  | 0  | 0  |
| <b>Ascalabos_voithii</b>              | 0  | 1   | 0  | 1  | -   | 1  | 1  | 1  | 1  | 1  | 1  | 0  |
| <b>Bavarichthys_incognitus</b>        | 0  | 0   | 0  | 0  | 1   | 1  | 1  | 1  | 1  | 1  | 0  | 0  |
| <b>Cavenderichthys_talbragarensis</b> | 0  | 1&2 | 0  | 0  | 0   | 1  | 1  | 1  | 1  | 1  | 0  | 0  |
| <b>Brycon_meeki</b>                   | -  | 2   | 0  | 0  | 1   | 1  | 1  | 1  | 1  | 0  | 0  | 1  |
| <b>Chanos_chanos</b>                  | -  | 3   | 0  | 0  | 0&1 | 1  | 1  | 1  | 1  | 0  | 1  | -  |
| <b>Chongichthys_dentatus</b>          | 0  | 0   | ?  | 1  | -   | 1  | 1  | 0  | 1  | 1  | 0  | ?  |
| <b>Crossognathus_sabaudians</b>       | 0  | 1   | 0  | ?  | ?   | 1  | 1  | 1  | 1  | 0  | 0  | 0  |
| <b>Denticeps_clupeoides</b>           | -  | 2   | 0  | 0  | 1   | 1  | 1  | 1  | 1  | 1  | 0  | 0  |
| <b>Diplomystus_dentatus</b>           | 0  | 1   | 0  | 0  | 1   | 1  | 1  | 1  | 1  | 1  | ?  | 0  |
| <b>Domeykos_profetaensis</b>          | 0  | 1   | 0  | 1  | -   | 1  | 1  | 0  | 1  | 1  | ?  | ?  |
| <b>Dorsetichthys_bechei</b>           | 0  | 0   | 0  | 1  | -   | 1  | 0  | 2  | ?  | 0  | 0  | 0  |
| <b>Engraulis_ringens</b>              | 0  | 0   | 0  | 0  | 1   | 1  | 1  | 1  | 1  | 1  | 0  | 0  |
| <b>Elops_saurus</b>                   | 0  | 0   | 0  | 1  | -   | 1  | 1  | 2  | 1  | 1  | 0  | 1  |
| <b>Erichalcis_arcta</b>               | 0  | 1   | 0  | 0  | 1   | 1  | 1  | 1  | 1  | 1  | 0  | 0  |
| <b>Esox_lucius</b>                    | 0  | 0   | 0  | 0  | 1   | 1  | 1  | 1  | 1  | 1  | 0  | 1  |
| <b>Eurycormus_speciosus</b>           | 0  | 1   | 0  | ?  | ?   | ?  | ?  | ?  | ?  | 0  | 0  | 1  |
| <b>Gordichthys_conquensis</b>         | -  | 3   | 0  | 0  | 1   | 1  | 1  | 1  | 1  | 0  | 1  | ?  |

| Taxon / Character number            | 65 | 66  | 67 | 68  | 69  | 70 | 71 | 72 | 73 | 74 | 75 | 76 |
|-------------------------------------|----|-----|----|-----|-----|----|----|----|----|----|----|----|
| <b>Goulmimichthys_arambourgi</b>    | 0  | 0   | 0  | ?   | ?   | 1  | 1  | 1  | 1  | 1  | 0  | 0  |
| <b>Hiodon_alosoides</b>             | -  | 1   | 0  | 1   | -   | 1  | 1  | 0  | 1  | 1  | 0  | 1  |
| <b>Heterotis_niloticus</b>          | -  | 2   | 0  | 0   | 0&1 | 1  | 1  | 0  | 1  | 1  | 0  | 0  |
| <b>Humbertia_operta</b>             | 0  | 1   | 0  | 0   | 1   | 1  | 1  | 1  | 1  | 1  | 0  | 0  |
| <b>Leptolepis_coryphaenoides</b>    | 0  | 1   | 0  | 0&1 | -   | 1  | 1  | 1  | 1  | 0  | 1  | 0  |
| <b>Leptolepis_koonwarri</b>         | 0  | 1   | 0  | 1   | -   | 1  | 1  | 1  | 1  | 1  | 1  | 0  |
| <b>Leptolepides_haerteisi</b>       | 0  | 2   | 0  | 0   | ?   | ?  | 1  | 1  | 1  | 1  | ?  | 0  |
| <b>Leptolepides_sprattiformis</b>   | 0  | 2   | 0  | 0   | 0   | 1  | 1  | 1  | 1  | 1  | 0  | ?  |
| <b>Luisichthysvinalaensis</b>       | 0  | 1   | 0  | ?   | ?   | 1  | 1  | ?  | ?  | 1  | ?  | 0  |
| <b>Luisiella_feruglioi</b>          | 0  | 1   | 0  | 1   | -   | 1  | 1  | 1  | 1  | 1  | 0  | 0  |
| <b>Lycoptera_middendorfi</b>        | 0  | 1   | 0  | ?   | ?   | 1  | 1  | ?  | ?  | 1  | 0  | 0  |
| <b>Megalops_atlanticus</b>          | 0  | 0   | 0  | 1   | -   | 1  | 1  | 2  | 1  | 1  | 0  | 0  |
| <b>Notelops_brama</b>               | 0  | 0   | 0  | 0   | 1   | 1  | 1  | 0  | 1  | 1  | 0  | 0  |
| <b>Oncorhynchus_mykiss</b>          | 0  | 0   | 0  | 0   | 1   | 1  | 1  | 1  | 1  | 1  | 0  | ?  |
| <b>Opsariichthys_bidens</b>         | -  | 2   | 0  | 0   | 1   | 1  | 1  | 1  | 1  | 1  | 0  | -  |
| <b>Orthogonikleithrus_hoelli</b>    | 0  | 1   | 0  | 0   | 1   | 1  | 1  | 1  | 1  | 0  | 0  | ?  |
| <b>Pachythrissops_properus</b>      | 0  | 1   | 0  | 1   | -   | ?  | 1  | 1  | 1  | 1  | 0  | 1  |
| <b>Pholidophorus_gervasutti</b>     | 0  | 0&1 | 0  | 1   | -   | ?  | 0  | ?  | ?  | 0  | 1  | 0  |
| <b>Pholidophorus_latiusculus</b>    | 0  | 0   | 0  | ?   | ?   | ?  | ?  | ?  | ?  | 0  | ?  | ?  |
| <b>Protoclupea_chilensis</b>        | 0  | 1   | 0  | 1   | -   | 1  | 1  | 0  | 1  | 1  | 1  | ?  |
| <b>Rhacolepis_buccalis</b>          | 0  | 0   | 0  | 0   | 1   | 1  | 1  | 1  | 1  | 1  | 0  | 0  |
| <b>Santanaclupea_silvasantosi</b>   | 0  | 0   | 0  | ?   | ?   | 1  | 1  | ?  | 1  | 1  | 0  | ?  |
| <b>Siemensichthys_macrocephalus</b> | 0  | 0   | 0  | 1   | -   | ?  | 0  | 2  | ?  | 0  | 0  | 0  |
| <b>Siemensichthys_siemensii</b>     | 0  | 0   | 0  | ?   | ?   | ?  | 0  | 2  | 0  | 0  | 0  | ?  |
| <b>Tharrhias_araripis_</b>          | -  | 3   | 0  | 0   | 1   | 1  | 1  | 0  | 1  | 0  | 0  | -  |
| <b>Tharsis_dubius</b>               | 0  | 1   | 0  | 0   | 0   | 1  | 1  | 1  | 1  | 1  | 1  | 0  |
| <b>Thrissops_formosus</b>           | 0  | 1   | 0  | 0   | 1   | 1  | 1  | 0  | 1  | 1  | 0  | 0  |
| <b>Thymallus_thymallus</b>          | 0  | 1   | 0  | 0   | 1   | 1  | 1  | 1  | 1  | 1  | 0  | ?  |
| <b>Umbra_krameri</b>                | -  | 2   | 0  | 0   | 1   | 1  | 1  | 1  | 1  | 0  | 0  | 0  |
| <b>Varasichthys_ariasi</b>          | 0  | 1   | 0  | 0   | 1   | 1  | 1  | 1  | 1  | 0  | 1  | 0  |

| Taxon / Character number              | 77 | 78 | 79 | 80 | 81 | 82  | 83 | 84 | 85 | 86 | 87 | 88 | 89 |
|---------------------------------------|----|----|----|----|----|-----|----|----|----|----|----|----|----|
| <b>Amia_calva</b>                     | 0  | 0  | 0  | 1  | 0  | 0   | 0  | 0  | 0  | 0  | 0  | 0  | 0  |
| <b>Amia_pattersoni</b>                | ?  | 0  | ?  | ?  | ?  | 0   | 0  | 0  | 0  | ?  | ?  | ?  | ?  |
| <b>Lepisosteus_osseus</b>             | 0  | 0  | 0  | 1  | 0  | ?   | 0  | 0  | 0  | 1  | 0  | 0  | 0  |
| <b>Obaichthys_decoratus</b>           | ?  | 0  | ?  | ?  | ?  | ?   | ?  | 0  | ?  | ?  | ?  | ?  | ?  |
| <b>Aspidorhynchus_acutirostris</b>    | 0  | 0  | 0  | ?  | 0  | ?   | ?  | 0  | ?  | ?  | ?  | ?  | ?  |
| <b>Belonostomus_tenuirostris</b>      | 0  | 0  | 0  | ?  | 0  | ?   | ?  | 0  | ?  | ?  | ?  | ?  | ?  |
| <b>Hypsocormus_macrodon</b>           | 0  | 0  | ?  | 1  | -  | 0   | ?  | 0  | 0  | 2  | ?  | ?  | ?  |
| <b>Mesturus_verrucosus</b>            | 1  | 0  | ?  | 0  | 1  | ?   | 0  | ?  | 0  | ?  | ?  | ?  | ?  |
| <b>Pachycormus_macropterus</b>        | 0  | 0  | 0  | 1  | -  | 0   | -  | 0  | 0  | 2  | ?  | ?  | ?  |
| <b>Vinctifer_comptoni</b>             | 0  | 0  | 0  | 1  | 0  | 1   | 1  | 0  | ?  | ?  | ?  | ?  | ?  |
| <b>Apsopelix_anglicus</b>             | 1  | 0  | 1  | 0  | 0  | ?   | 1  | 0  | 1  | ?  | ?  | ?  | ?  |
| <b>Allothrissops_mesogaster</b>       | 1  | 0  | 1  | 0  | 0  | 0   | 1  | 0  | ?  | ?  | ?  | ?  | ?  |
| <b>Anaethalion_angustus</b>           | 1  | 0  | ?  | 1  | ?  | 0   | 1  | 0  | ?  | ?  | ?  | ?  | ?  |
| <b>Anaethalion_knorri</b>             | 1  | 0  | ?  | 1  | 0  | 0   | 1  | 0  | ?  | ?  | ?  | ?  | ?  |
| <b>Ascalabos_voithii</b>              | 1  | 0  | ?  | 0  | ?  | 0   | 1  | 0  | ?  | ?  | ?  | ?  | ?  |
| <b>Bavarichthys_incognitus</b>        | ?  | ?  | ?  | ?  | ?  | ?   | 0  | 0  | ?  | ?  | ?  | ?  | ?  |
| <b>Cavenderichthys_talbragarensis</b> | 1  | 0  | ?  | 0  | 0  | 0   | 0  | 0  | ?  | ?  | ?  | ?  | ?  |
| <b>Brycon_meeki</b>                   | 1  | 0  | 1  | 0  | 1  | 0&1 | 0  | 0  | 1  | 0  | 1  | 1  | 1  |
| <b>Chanos_chanos</b>                  | 1  | 0  | 1  | 0  | 1  | 1   | 1  | 0  | 1  | 2  | 1  | 1  | 1  |
| <b>Chongichthys_dentatus</b>          | 1  | 0  | 1  | ?  | ?  | 0   | 0  | 0  | ?  | ?  | ?  | ?  | ?  |
| <b>Crossognathus_sabaudians</b>       | 1  | 0  | 1  | 0  | 0  | 0   | 1  | 0  | ?  | ?  | ?  | ?  | ?  |
| <b>Denticeps_clupeoides</b>           | 1  | 0  | 1  | ?  | 1  | ?   | ?  | 0  | 1  | 2  | 1  | 1  | 1  |
| <b>Diplomystus_dentatus</b>           | 1  | 0  | 1  | 0  | 1  | 0&1 | 0  | 0  | ?  | 2  | ?  | ?  | ?  |
| <b>Domeykos_profetaensis</b>          | 1  | 0  | 1  | ?  | 0  | ?   | 2  | 0  | ?  | ?  | ?  | ?  | ?  |
| <b>Dorsetichthys_bechei</b>           | 0  | 0  | 0  | 1  | 0  | 0   | 2  | 0  | ?  | ?  | ?  | ?  | ?  |
| <b>Engraulis_ringens</b>              | 0  | 0  | 1  | 0  | 1  | ?   | ?  | 0  | 1  | 2  | 1  | 1  | 1  |
| <b>Elops_saurus</b>                   | 0  | 0  | 2  | 1  | 0  | 1   | 1  | 0  | 1  | 2  | 0  | ?  | 0  |
| <b>Erichalcis_arcta</b>               | 1  | 0  | 1  | 0  | 1  | 0   | 1  | 0  | ?  | ?  | ?  | ?  | ?  |
| <b>Esox_lucius</b>                    | 1  | 1  | 2  | 0  | ?  | ?   | 0  | 1  | 1  | 2  | 1  | 0  | 0  |
| <b>Eurycormus_speciosus</b>           | 0  | 0  | 0  | 1  | 0  | ?   | 2  | 0  | ?  | ?  | ?  | ?  | ?  |
| <b>Gordichthys_conquensis</b>         | 1  | 0  | 1  | ?  | ?  | 1   | ?  | 0  | ?  | ?  | ?  | ?  | ?  |

| Taxon / Character number            | 77  | 78 | 79 | 80 | 81 | 82  | 83  | 84 | 85 | 86 | 87 | 88 | 89 |
|-------------------------------------|-----|----|----|----|----|-----|-----|----|----|----|----|----|----|
| <b>Goulmimichthys_arambourgi</b>    | ?   | ?  | 1  | ?  | 0  | ?   | ?   | 0  | ?  | ?  | ?  | ?  | ?  |
| <b>Hiodon_alosoides</b>             | 1   | 0  | 2  | 0  | 0  | 0&1 | 1   | 0  | 1  | 2  | 1  | 1  | 0  |
| <b>Heterotis_niloticus</b>          | 1   | 0  | 1  | 0  | 1  | 1   | 0   | 0  | 1  | 2  | 1  | ?  | 1  |
| <b>Humbertia_operta</b>             | 1   | 0  | 1  | 0  | 1  | 1   | 1   | 0  | ?  | ?  | ?  | ?  | ?  |
| <b>Leptolepis_coryphaenoides</b>    | 0&1 | 0  | 0  | 1  | 0  | 0   | 2   | 0  | ?  | ?  | ?  | ?  | ?  |
| <b>Leptolepis_koonwarri</b>         | 1   | 0  | ?  | ?  | 0  | 0   | 0   | 0  | ?  | ?  | ?  | ?  | ?  |
| <b>Leptolepides_haerteisi</b>       | 1   | 0  | 0  | 0  | ?  | 1   | 0   | 0  | ?  | ?  | ?  | ?  | ?  |
| <b>Leptolepides_sprattiformis</b>   | 1   | 0  | 1  | 0  | 0  | 0   | 0   | 0  | 1  | ?  | ?  | ?  | ?  |
| <b>Luisichthysvinalaensis</b>       | 1   | ?  | 1  | 0  | ?  | ?   | 2   | 0  | ?  | ?  | ?  | ?  | ?  |
| <b>Luisiella_feruglioi</b>          | 1   | 0  | 0  | 0  | 0  | 0   | 1   | 0  | ?  | ?  | ?  | ?  | ?  |
| <b>Lycoptera_middendorfi</b>        | 1   | 0  | 0  | 0  | 0  | 0   | 0   | 0  | ?  | ?  | ?  | ?  | ?  |
| <b>Megalops_atlanticus</b>          | 0   | 0  | 1  | 1  | -  | ?   | 1   | 0  | 1  | 2  | 0  | 0  | 0  |
| <b>Notelops_brama</b>               | ?   | 0  | 1  | 1  | 0  | 1   | 0   | 0  | ?  | ?  | ?  | ?  | ?  |
| <b>Oncorhynchus_mykiss</b>          | 1   | 0  | 1  | 0  | 0  | 1   | 0   | 0  | 1  | 2  | 1  | 1  | 1  |
| <b>Opsariichthys_bidens</b>         | 1   | 0  | 1  | 0  | ?  | 1   | 0   | 0  | 1  | 0  | 1  | 1  | 1  |
| <b>Orthogonikleithrus_hoelli</b>    | 1   | 0  | 1  | 0  | ?  | 1   | 0   | 0  | ?  | ?  | ?  | ?  | ?  |
| <b>Pachythrissops_propterus</b>     | 1   | 0  | ?  | 0  | ?  | ?   | ?   | 0  | ?  | ?  | ?  | ?  | ?  |
| <b>Pholidophorus_gervasutti</b>     | 0   | ?  | 0  | 1  | 0  | ?   | ?   | 0  | ?  | ?  | ?  | ?  | ?  |
| <b>Pholidophorus_latiusculus</b>    | 0   | 0  | 1  | ?  | ?  | 0   | 2   | 0  | ?  | ?  | ?  | ?  | ?  |
| <b>Protoclupea_chilensis</b>        | 1   | 0  | 0  | ?  | 0  | 0   | 2   | 0  | ?  | ?  | ?  | ?  | ?  |
| <b>Rhacolepis_buccalis</b>          | ?   | 0  | 1  | 0  | 0  | 1   | 1   | 0  | ?  | 2  | ?  | ?  | ?  |
| <b>Santanaclupea_silvasantosi</b>   | ?   | 0  | 1  | ?  | 1  | 0   | 0&1 | 0  | ?  | ?  | ?  | ?  | ?  |
| <b>Siemensichthys_macrocephalus</b> | 0   | 0  | ?  | ?  | ?  | 0   | 2   | 0  | ?  | ?  | ?  | ?  | ?  |
| <b>Siemensichthys_siemensii</b>     | 0   | 0  | ?  | ?  | ?  | ?   | 2   | 0  | ?  | ?  | ?  | ?  | ?  |
| <b>Tharrhias_araripis_</b>          | 1   | 0  | ?  | 0  | 1  | 1   | ?   | 0  | ?  | ?  | ?  | ?  | ?  |
| <b>Tharsis_dubius</b>               | 0   | 0  | 1  | 1  | 0  | 0   | 2   | 0  | ?  | ?  | ?  | ?  | ?  |
| <b>Thrissops_formosus</b>           | 1   | 0  | 1  | 0  | 0  | 0   | 1   | 0  | ?  | ?  | ?  | ?  | ?  |
| <b>Thymallus_thymallus</b>          | 1   | 0  | 1  | 0  | 0  | 1   | 0   | 0  | 1  | 2  | 1  | 1  | 1  |
| <b>Umbra_krameri</b>                | 1   | 1  | 1  | 0  | ?  | 1   | 0   | 1  | 1  | 2  | 1  | 1  | 1  |
| <b>Varasichthys_ariasi</b>          | 1   | 0  | 0  | 0  | 0  | 0   | 2   | 0  | ?  | ?  | ?  | ?  | ?  |



| Taxon / Character number              | 90 | 91 | 92 | 93 | 94 | 95 | 96 | 97 | 98 | 99 | 100 | 101 | 102 |
|---------------------------------------|----|----|----|----|----|----|----|----|----|----|-----|-----|-----|
| <b>Amia_calva</b>                     | 0  | ?  | ?  | ?  | 0  | 0  | 0  | 0  | 0  | 0  | 0   | 1   | 0   |
| <b>Amia_pattersoni</b>                | 0  | ?  | ?  | ?  | 0  | 0  | 0  | 0  | 0  | 0  | 0   | ?   | 0   |
| <b>Lepisosteus_osseus</b>             | 1  | 0  | -  | -  | 2  | 0  | 0  | 0  | 0  | ?  | 0   | 1   | 0   |
| <b>Obaichthys_decoratus</b>           | 1  | 0  | -  | -  | 2  | 0  | ?  | 0  | 0  | 0  | ?   | 1   | 0   |
| <b>Aspidorhynchus_acutirostris</b>    | 0  | 0  | -  | -  | 0  | 0  | ?  | 0  | 0  | ?  | ?   | ?   | 0   |
| <b>Belonostomus_tenuirostris</b>      | 0  | 0  | -  | -  | 0  | 0  | ?  | 0  | 0  | ?  | ?   | ?   | 0   |
| <b>Hypsocormus_macrodon</b>           | 0  | 0  | -  | -  | 0  | 0  | ?  | 0  | 0  | ?  | 1   | 1   | 0   |
| <b>Mesturus_verrucosus</b>            | 0  | 0  | -  | -  | 0  | ?  | 0  | 0  | 0  | ?  | ?   | 0   | 0   |
| <b>Pachycormus_macropterus</b>        | 0  | 0  | -  | -  | 0  | 0  | ?  | 0  | 0  | 0  | 1   | 1   | 0   |
| <b>Vinctifer_comptoni</b>             | 0  | 0  | -  | -  | 0  | 0  | ?  | 0  | 0  | ?  | ?   | ?   | 0   |
| <b>Apsopelix_anglicus</b>             | 0  | 1  | 1  | 1  | 0  | ?  | 0  | 0  | 0  | 0  | ?   | 0   | 1   |
| <b>Allothrissops_mesogaster</b>       | 0  | 1  | 1  | 1  | 0  | 0  | 0  | 0  | 0  | ?  | 1   | 1   | 1   |
| <b>Anaethalion_angustus</b>           | 0  | 1  | 1  | 1  | 0  | 0  | 0  | 0  | 0  | 0  | ?   | 1   | 1   |
| <b>Anaethalion_knorri</b>             | 0  | 1  | 1  | 1  | 0  | 0  | 0  | 0  | 0  | 0  | 1   | 1   | 1   |
| <b>Ascalabos_voithii</b>              | 0  | 1  | 1  | 1  | 0  | 0  | 0  | 0  | 0  | 1  | 1   | 1   | 1   |
| <b>Bavarichthys_incognitus</b>        | 0  | 1  | 1  | 1  | 0  | 0  | 0  | 0  | 0  | 1  | 1   | 1   | 1   |
| <b>Cavenderichthys_talbragarensis</b> | 0  | 1  | 0  | 0  | ?  | 0  | 0  | 0  | 0  | 0  | 1   | 1   | 1   |
| <b>Brycon_meeki</b>                   | 0  | ?  | 1  | 1  | 1  | 0  | 1  | 1  | 2  | 0  | 1   | 1   | 1   |
| <b>Chanos_chanos</b>                  | 0  | 1  | 1  | 1  | 0  | 1  | 1  | 0  | 1  | 1  | ?   | 1   | 1   |
| <b>Chongichthys_dentatus</b>          | 0  | 1  | 1  | 1  | 0  | 0  | 0  | 0  | 0  | 0  | 0&1 | 1   | 1   |
| <b>Crossognathus_sabaudians</b>       | 0  | 1  | 1  | 1  | 0  | ?  | 0  | 0  | 0  | ?  | 1   | 1   | 1   |
| <b>Denticeps_clupeoides</b>           | 0  | 2  | 1  | 1  | 1  | 0  | 1  | 0  | 0  | 0  | ?   | 0   | ?   |
| <b>Diplomystus_dentatus</b>           | 0  | 1  | 1  | 1  | 1  | 0  | 0  | 0  | 0  | 0  | ?   | 1   | 1   |
| <b>Domeykos_profetaensis</b>          | 0  | 1  | 1  | 1  | 0  | 0  | 0  | 0  | 0  | 1  | ?   | 0   | 1   |
| <b>Dorsetichthys_bechei</b>           | 0  | 0  | -  | -  | 0  | 0  | 0  | 0  | 0  | ?  | ?   | ?   | 1   |
| <b>Engraulis_ringens</b>              | 0  | 2  | 1  | 1  | 1  | 0  | 1  | 0  | 0  | ?  | ?   | 1   | 1   |
| <b>Elops_saurus</b>                   | 0  | 1  | 1  | 1  | 0  | 0  | 0  | 0  | 0  | 0  | ?   | 1   | 1   |
| <b>Erichalcis_arcta</b>               | 0  | 1  | 1  | 1  | 0  | 0  | 1  | 0  | 0  | ?  | ?   | ?   | ?   |
| <b>Esox_lucius</b>                    | 0  | 1  | 1  | 1  | 0  | 0  | 0  | 0  | 0  | 0  | 1   | 1   | 1   |
| <b>Eurycormus_speciosus</b>           | 0  | 0  | -  | -  | ?  | 0  | 0  | 0  | 0  | 1  | ?   | 1   | 1   |
| <b>Gordichthys_conquensis</b>         | 0  | 1  | 1  | 1  | 0  | 1  | 0  | 0  | 1  | ?  | 1   | 1   | 1   |

| Taxon / Character number            | 90 | 91 | 92  | 93 | 94 | 95 | 96 | 97 | 98 | 99 | 100 | 101 | 102 |
|-------------------------------------|----|----|-----|----|----|----|----|----|----|----|-----|-----|-----|
| <b>Goulmimichthys_arambourgi</b>    | 0  | 1  | 1   | 1  | 0  | 0  | 0  | 0  | 0  | ?  | ?   | ?   | 1   |
| <b>Hiodon_alosoides</b>             | 0  | 1  | 1   | 1  | 0  | 0  | 1  | 0  | 0  | 1  | 0   | 1   | 1   |
| <b>Heterotis_niloticus</b>          | 0  | 1  | 0   | 1  | 1  | 0  | 1  | 0  | 0  | 0  | ?   | 1   | 1   |
| <b>Humbertia_operta</b>             | 0  | 1  | 1   | 1  | 0  | 0  | 0  | 0  | 0  | 0  | ?   | 1   | 1   |
| <b>Leptolepis_coryphaenoides</b>    | 0  | 1  | 0   | 0  | 0  | 0  | 0  | 0  | 0  | ?  | ?   | 1   | 1   |
| <b>Leptolepis_koonwarri</b>         | 0  | 1  | ?   | 0  | 0  | 0  | 0  | 0  | 0  | ?  | 1   | 1   | 1   |
| <b>Leptolepides_haerteisi</b>       | 0  | 1  | 2   | 1  | 0  | 0  | 0  | 0  | 0  | 0  | 1   | 1   | 1   |
| <b>Leptolepides_sprattiformis</b>   | 0  | 1  | 2   | 1  | 0  | 0  | 0  | 0  | 0  | 0  | 1   | 1   | 1   |
| <b>Luisichthysvinalaensis</b>       | 0  | 1  | 1   | 1  | 0  | 0  | 0  | 0  | 0  | ?  | ?   | 1   | 1   |
| <b>Luisiella_feruglioi</b>          | 0  | 1  | 0&1 | 1  | 0  | 0  | 0  | 0  | 0  | 1  | 1   | 1   | 1   |
| <b>Lycoptera_middendorfi</b>        | 0  | 1  | 1   | 1  | 0  | 0  | 0  | 0  | 0  | ?  | ?   | 1   | 1   |
| <b>Megalops_atlanticus</b>          | 0  | 1  | 1   | 1  | 0  | 0  | 0  | 0  | 0  | ?  | ?   | ?   | 1   |
| <b>Notelops_brama</b>               | 0  | 1  | 1   | 1  | 0  | 0  | 0  | 0  | 0  | 1  | 0   | 1   | 1   |
| <b>Oncorhynchus_mykiss</b>          | 0  | 1  | 1   | 1  | 0  | 0  | 0  | 0  | 0  | 1  | ?   | 1   | 1   |
| <b>Opsariichthys_bidens</b>         | 0  | 1  | 2   | 1  | 1  | 0  | 1  | 1  | 2  | 0  | ?   | 1   | 1   |
| <b>Orthogonikleithrus_hoelli</b>    | 0  | 1  | 1   | 1  | 0  | 0  | 0  | 0  | 0  | 1  | 1   | 1   | 1   |
| <b>Pachythrissops_propterus</b>     | 0  | 1  | 1   | 1  | 0  | 0  | 0  | 0  | 0  | 0  | ?   | 1   | 1   |
| <b>Pholidophorus_gervasutti</b>     | 0  | 0  | -   | -  | ?  | ?  | ?  | ?  | ?  | ?  | ?   | ?   | ?   |
| <b>Pholidophorus_latiusculus</b>    | 0  | 0  | -   | -  | ?  | ?  | ?  | ?  | ?  | ?  | ?   | ?   | ?   |
| <b>Protoclupea_chilensis</b>        | 0  | 1  | 1   | 1  | 0  | 0  | 0  | 0  | 0  | ?  | 1   | ?   | 1   |
| <b>Rhacolepis_buccalis</b>          | 0  | 1  | 1   | 1  | 0  | 0  | 0  | 0  | 0  | 1  | 0   | 0   | 1   |
| <b>Santanaclupea_silvasantosi</b>   | 0  | ?  | 1   | 1  | 0  | ?  | 0  | 0  | 0  | 0  | ?   | 1   | 1   |
| <b>Siemensichthys_macrocephalus</b> | 0  | 0  | -   | -  | ?  | ?  | ?  | ?  | ?  | ?  | ?   | ?   | 1   |
| <b>Siemensichthys_siemensii</b>     | 0  | ?  | ?   | ?  | ?  | ?  | ?  | ?  | ?  | ?  | ?   | ?   | ?   |
| <b>Tharrhias_araripis_</b>          | 0  | 1  | 1   | 1  | 0  | 1  | 1  | 0  | 1  | 1  | 0   | 1   | ?   |
| <b>Tharsis_dubius</b>               | 0  | 1  | 1   | 1  | 0  | 0  | 0  | 0  | 0  | 0  | 1   | ?   | 1   |
| <b>Thrissops_formosus</b>           | 0  | 1  | 1   | 1  | 0  | 0  | 0  | 0  | 0  | 0  | 1   | 1   | 1   |
| <b>Thymallus_thymallus</b>          | 0  | 1  | 1   | 1  | 0  | 0  | 0  | 0  | 0  | 1  | ?   | 1   | 1   |
| <b>Umbra_krameri</b>                | 0  | 1  | 1   | 1  | 1  | 0  | 0  | 0  | 0  | 0  | 1   | 1   | ?   |
| <b>Varasichthys_ariasi</b>          | 0  | 1  | 1   | 1  | 0  | 0  | 0  | 0  | 0  | ?  | 1   | 0   | 1   |

| <b>Taxon / Character number</b>       | <b>103</b> | <b>104</b> | <b>105</b> | <b>106</b> | <b>107</b> | <b>108</b> | <b>109</b> | <b>110</b> | <b>111</b> | <b>112</b> | <b>113</b> |
|---------------------------------------|------------|------------|------------|------------|------------|------------|------------|------------|------------|------------|------------|
| <b>Amia_calva</b>                     | 0          | -          | 0          | 0          | 0          | 0          | 0          | 0          | 0          | 0          | 0          |
| <b>Amia_pattersoni</b>                | 0          | -          | 0          | 0          | 0          | 0          | 0          | 0          | ?          | 0          | 0          |
| <b>Lepisosteus_osseus</b>             | 0          | -          | 0          | 0          | 0          | 0          | 0          | 0          | 0          | 0          | 0          |
| <b>Obaichthys_decoratus</b>           | 0          | -          | 0          | 0          | 0          | 0          | 0          | 0          | 0          | 0          | 0          |
| <b>Aspidorhynchus_acutirostris</b>    | ?          | ?          | 0          | 0          | 0          | ?          | 0          | 0          | ?          | 1          | 0          |
| <b>Belonostomus_tenuirostris</b>      | ?          | ?          | 0          | ?          | 0          | 2          | 0          | ?          | ?          | 0          | 0          |
| <b>Hypsocormus_macrodon</b>           | ?          | ?          | 0          | 0          | 0          | ?          | 0          | ?          | 1          | 1          | 0          |
| <b>Mesturus_verrucosus</b>            | 0          | -          | 0          | ?          | 0          | ?          | 0          | ?          | 0          | 0          | 0          |
| <b>Pachycormus_macropterus</b>        | ?          | ?          | 0          | 0          | 0          | 0          | 0          | 1          | 1          | 1          | 0          |
| <b>Vinctifer_comptoni</b>             | ?          | ?          | 0          | 0          | 0          | 2          | 0          | 0          | 1          | 0          | 0          |
| <b>Apsopelix_anglicus</b>             | 1          | 1          | 1          | ?          | 0          | ?          | 1          | ?          | 1          | 0          | ?          |
| <b>Allothrissops_mesogaster</b>       | 0          | -          | 0          | 0          | 0          | 0          | 1          | 1          | 1          | 0          | 0          |
| <b>Anaethalion_angustus</b>           | 1          | 1          | 0          | ?          | 0          | ?          | 0          | 1          | 1          | 0          | 0          |
| <b>Anaethalion_knorri</b>             | ?          | ?          | 0          | 1          | 0          | ?          | 0          | ?          | ?          | 0          | 0          |
| <b>Ascalabos_voithii</b>              | 1          | 0          | 0          | 0          | 0          | 0          | 0          | 1          | 1          | 0          | 0          |
| <b>Bavarichthys_incognitus</b>        | 1          | 1          | 1          | ?          | 0          | 0          | 0          | ?          | ?          | 0          | ?          |
| <b>Cavenderichthys_talbragarensis</b> | 1          | 0          | 0          | ?          | 0          | 0          | 0          | 1          | 1          | 0          | ?          |
| <b>Brycon_meeki</b>                   | 1          | 1          | 1          | 0          | 0          | 0          | 0          | 1          | 1          | 0          | 0          |
| <b>Chanos_chanos</b>                  | 1          | 1          | 1          | 0          | 0          | 2          | 0          | 1          | 1          | 0          | 1          |
| <b>Chongichthys_dentatus</b>          | 1          | 0          | 0          | ?          | 0          | ?          | 0          | ?          | ?          | 0          | ?          |
| <b>Crossognathus_sabaudians</b>       | 1          | 1          | 1          | 0          | 0          | ?          | 0          | ?          | ?          | 0          | ?          |
| <b>Denticeps_clupeoides</b>           | 1          | 1          | 1          | 0          | 1          | 0          | 0          | 1          | 1          | 0          | 0          |
| <b>Diplomystus_dentatus</b>           | 1          | 1          | 1          | 0          | ?          | 0          | 0          | ?          | 1          | 0          | 0          |
| <b>Domeykos_profetaensis</b>          | 1          | 0          | 0          | 1          | 0          | 1          | 0          | 1          | ?          | 0          | 1          |
| <b>Dorsetichthys_bechei</b>           | 0          | -          | 0          | ?          | 0          | 0          | 0          | ?          | ?          | 0          | 0          |
| <b>Engraulis_ringens</b>              | 1          | 1          | 1          | 0          | 1          | 0          | 0          | 1          | 1          | 0          | 1          |
| <b>Elops_saurus</b>                   | 1          | 1          | 1          | 0          | 0          | 1          | 0          | 1          | 1          | 0          | 1          |
| <b>Erichalcis_arcta</b>               | ?          | ?          | ?          | 0          | 0          | 0          | 0          | ?          | ?          | 0          | 0          |
| <b>Esox_lucius</b>                    | 1          | 1          | 1          | 0          | 0          | 0          | 0          | 1          | 1          | 0          | 0          |
| <b>Eurycormus_speciosus</b>           | 0          | -          | 0          | 0          | 0          | 0          | ?          | 1          | 1          | 0          | 0          |
| <b>Gordichthys_conquensis</b>         | 1          | 0          | 0          | 0          | 0          | 0          | 0          | ?          | 1          | 0          | ?          |

| Taxon / Character number            | 103 | 104 | 105 | 106 | 107 | 108 | 109 | 110 | 111 | 112 | 113 |
|-------------------------------------|-----|-----|-----|-----|-----|-----|-----|-----|-----|-----|-----|
| <b>Goulmimichthys_arambourgi</b>    | ?   | ?   | 0   | ?   | 0   | ?   | 0   | ?   | ?   | 0   | ?   |
| <b>Hiodon_alosoides</b>             | -   | ?   | 0   | 0   | 0   | 0   | 1   | 1   | 1   | 0   | 1   |
| <b>Heterotis_niloticus</b>          | 1   | 1   | 0   | 2   | 0   | 0   | 0   | 1   | 1   | 0   | ?   |
| <b>Humbertia_operta</b>             | 1   | 1   | 1   | ?   | 0   | 0   | 0   | 1   | 1   | 0   | 0   |
| <b>Leptolepis_coryphaenoides</b>    | 0   | -   | 0   | 1   | 0   | 0   | 0   | 1   | 1   | 0   | 0   |
| <b>Leptolepis_koonwarri</b>         | 0   | -   | ?   | 0   | 0   | ?   | 0   | 1   | 1   | 0   | ?   |
| <b>Leptolepides_haerteisi</b>       | 1   | 1   | 0   | ?   | 0   | 0   | 0   | ?   | ?   | 0   | 0   |
| <b>Leptolepides_sprattiformis</b>   | 1   | 0   | 0   | 0   | 0   | 0   | 0   | 1   | 1   | 0   | 0   |
| <b>Luisichthysvinalaensis</b>       | 1   | 0   | 0   | ?   | 0   | 1   | 0   | ?   | ?   | 0   | ?   |
| <b>Luisiella_feruglioi</b>          | 0   | -   | 0   | 0   | 0   | 0   | 0   | 1   | 1   | 0   | 0   |
| <b>Lycoptera_middendorfi</b>        | 0   | -   | 0   | 0   | 0   | 0   | 0   | ?   | ?   | 0   | ?   |
| <b>Megalops_atlanticus</b>          | ?   | ?   | 1   | 0   | 0   | 1   | 0   | 1   | 1   | 0   | 1   |
| <b>Notelops_brama</b>               | 0   | -   | 0   | 0   | 0   | 0   | 0   | ?   | ?   | 0   | ?   |
| <b>Oncorhynchus_mykiss</b>          | 1   | 0   | 0   | 0   | 0   | 1   | 0   | 1   | 1   | 0   | 0   |
| <b>Opsariichthys_bidens</b>         | ?   | ?   | 1   | 0   | 0   | 0   | 0   | 1   | 1   | 0   | 0   |
| <b>Orthogonikleithrus_hoelli</b>    | ?   | ?   | 0   | ?   | 0   | 0   | 0   | ?   | 1   | 0   | ?   |
| <b>Pachythrissops_properus</b>      | 1   | 1   | 0   | ?   | 0   | ?   | 1   | 1   | ?   | 0   | 0   |
| <b>Pholidophorus_gervasutti</b>     | ?   | ?   | ?   | 0   | ?   | 0   | ?   | 0   | ?   | ?   | 1   |
| <b>Pholidophorus_latiusculus</b>    | ?   | ?   | ?   | ?   | ?   | 0   | ?   | ?   | ?   | 0   | ?   |
| <b>Protoclupea_chilensis</b>        | ?   | ?   | 0   | 1   | 0   | 1   | 0   | ?   | ?   | 0   | 1   |
| <b>Rhacolepis_buccalis</b>          | 0   | -   | 0   | 1   | 0   | 0   | 0   | ?   | ?   | 0   | ?   |
| <b>Santanaclupea_silvasantosi</b>   | ?   | ?   | 0   | ?   | 0   | 0   | ?   | ?   | ?   | 0   | ?   |
| <b>Siemensichthys_macrocephalus</b> | ?   | ?   | ?   | 0   | ?   | 0   | ?   | 1   | ?   | 0   | 0   |
| <b>Siemensichthys_siemensii</b>     | ?   | ?   | ?   | ?   | ?   | 0   | ?   | ?   | ?   | 0   | ?   |
| <b>Tharrhias_araripis_</b>          | 0   | -   | 0   | ?   | 0   | 0   | 0   | 1   | 1   | 0   | ?   |
| <b>Tharsis_dubius</b>               | 1   | 0   | 0   | 0   | 0   | 0   | 0   | 1   | 1   | 0   | 0   |
| <b>Thrissops_formosus</b>           | 0   | -   | 0   | ?   | 0   | 0   | 1   | 1   | ?   | 0   | 0   |
| <b>Thymallus_thymallus</b>          | 1   | 0   | 0   | 0   | 0   | 0   | 0   | 1   | 1   | 0   | 0   |
| <b>Umbra_krameri</b>                | 1   | 1   | ?   | 1   | 0   | 0   | 0   | 1   | 1   | 0   | 0   |
| <b>Varasichthys_ariasi</b>          | 1   | 0   | 0   | 1   | 1   | 1   | 0   | 0   | ?   | 0   | 1   |

| Taxon / Character number              | 114 | 115 | 116 | 117 | 118 | 119 | 120 | 121 | 122 | 123 | 124 |
|---------------------------------------|-----|-----|-----|-----|-----|-----|-----|-----|-----|-----|-----|
| <b>Amia_calva</b>                     | 0   | 1   | 0   | 0   | 0   | 0   | 1   | 1   | 0   | 0   | 1   |
| <b>Amia_pattersoni</b>                | 0   | 1   | 0   | 0   | 0   | 0   | 1   | 1   | 0   | 0   | 1   |
| <b>Lepisosteus_osseus</b>             | 0   | 0   | 0   | 1   | 0   | 0   | 1   | 0   | 0   | 0   | 0   |
| <b>Obaichthys_decoratus</b>           | 0   | 0   | 0   | 1   | 0   | ?   | ?   | 0   | 0   | 0   | 0   |
| <b>Aspidorhynchus_acutirostris</b>    | 0   | 1   | 0   | 1   | 0   | ?   | ?   | 0   | 0   | 0   | 0   |
| <b>Belonostomus_tenuirostris</b>      | 0   | 1   | 0   | 1   | 0   | ?   | ?   | 0   | 0   | 0   | 0   |
| <b>Hypsocormus_macrodon</b>           | 0   | 0   | 0   | 0   | 1   | ?   | ?   | ?   | 0   | ?   | ?   |
| <b>Mesturus_verrucosus</b>            | 0   | ?   | 1   | 1   | ?   | 0   | 1   | ?   | 0   | 0   | ?   |
| <b>Pachycormus_macropterus</b>        | 0   | 0   | 0   | 0   | 0   | 0   | 1   | ?   | 0   | 0   | ?   |
| <b>Vinctifer_comptoni</b>             | 0   | ?   | 0   | 1   | 0   | ?   | ?   | 0   | 0   | 0   | 0   |
| <b>Apsopelix_anglicus</b>             | ?   | 1   | 0   | 2   | 1   | 0   | 0   | 1   | 0   | 0   | 1   |
| <b>Allothrissops_mesogaster</b>       | 0   | 1   | 0   | 1   | 1   | 1   | 0   | 1   | 1   | 0   | 1   |
| <b>Anaethalion_angustus</b>           | ?   | 1   | 0   | 0   | 0   | 1   | 0   | 1   | 0   | 0   | 1   |
| <b>Anaethalion_knorri</b>             | 0   | 1   | 0   | 0   | 0   | 1   | 0   | 1   | 0   | 0   | 1   |
| <b>Ascalabos_voithii</b>              | 0   | 1   | 0   | 0   | 1   | 1   | 0   | 1   | 0   | 0   | 1   |
| <b>Bavarichthys_incognitus</b>        | ?   | 1   | 0   | 0   | 1   | 1   | 1   | 1   | 0   | 0   | 1   |
| <b>Cavenderichthys_talbragarensis</b> | ?   | 1   | 0   | 0   | 0   | 1   | 1   | 1   | 0   | 0   | 1   |
| <b>Brycon_meeki</b>                   | ?   | 1   | 0   | ?   | ?   | 0   | 1   | 1   | 0   | 0   | 1   |
| <b>Chanos_chanos</b>                  | 1   | 1   | 0   | 0   | 0   | 0   | ?   | 1   | 0   | 0   | 1   |
| <b>Chongichthys_dentatus</b>          | 0   | 1   | 0   | 0   | 1   | 0   | 1   | 1   | 0   | 0   | 1   |
| <b>Crossognathus_sabaudians</b>       | 0   | 1   | 0   | 2   | ?   | ?   | 1   | 1   | 0   | 0   | 1   |
| <b>Denticeps_clupeoides</b>           | 0   | 1   | 1   | 1   | 0   | 1   | 0   | 1   | 0   | 0   | 1   |
| <b>Diplomystus_dentatus</b>           | 0   | 1   | 1   | 0   | 0   | 0   | 0   | 1   | 0   | 0   | 1   |
| <b>Domeykos_profetaensis</b>          | 1   | 1   | 0   | 0   | ?   | ?   | ?   | 1   | 0   | 0   | 1   |
| <b>Dorsetichthys_bechei</b>           | 0   | 0   | 0   | 0   | 0   | ?   | ?   | 0   | 0   | 0   | 0   |
| <b>Engraulis_ringens</b>              | ?   | 1   | 1   | 0   | 0   | 1   | 0   | 1   | 0   | 0   | 1   |
| <b>Elops_saurus</b>                   | 1   | 1   | 0   | 0   | 1   | 0   | 1   | 1   | 0   | 0   | 1   |
| <b>Erichalcis_arcta</b>               | 0   | 1   | 0   | ?   | ?   | ?   | ?   | 1   | 0   | 1   | 1   |
| <b>Esox_lucius</b>                    | 0   | 1   | 0   | 1   | 0   | 0&1 | 0   | 1   | 0   | 0   | 1   |
| <b>Eurycormus_speciosus</b>           | 0   | 0   | 0   | 0   | 0   | ?   | ?   | 0   | 1   | 0   | 0   |
| <b>Gordichthys_conquensis</b>         | ?   | 1   | 0   | 0   | 0   | 0   | 1   | 1   | 0   | 0   | 1   |

| <b>Taxon / Character number</b>     | <b>114</b> | <b>115</b> | <b>116</b> | <b>117</b> | <b>118</b> | <b>119</b> | <b>120</b> | <b>121</b> | <b>122</b> | <b>123</b> | <b>124</b> |
|-------------------------------------|------------|------------|------------|------------|------------|------------|------------|------------|------------|------------|------------|
| <b>Goulmimichthys_arambourgi</b>    | 0          | 1          | 0          | 2          | ?          | 0          | 0          | 1          | 0          | 0          | 1          |
| <b>Hiodon_alosoides</b>             | 1          | 1          | 0          | 1          | 1          | 0          | 1          | 1          | 0          | 0          | 1          |
| <b>Heterotis_niloticus</b>          | ?          | 1          | 0          | 1          | 0          | 1          | 0          | 1          | 0          | 0          | 1          |
| <b>Humbertia_operta</b>             | ?          | 1          | 0          | 0          | 0          | 1          | 1          | 1          | 0          | 1          | 1          |
| <b>Leptolepis_coryphaenoides</b>    | 1          | 1          | 0          | 0          | 0          | ?          | 0          | 1          | 0          | 0          | 1          |
| <b>Leptolepis_koonwarri</b>         | ?          | 1          | 0          | 0          | 0          | ?          | ?          | 1          | 0          | 0          | 1          |
| <b>Leptolepides_haerteisi</b>       | 0          | 1          | 0          | 2          | 0          | 1          | 1          | 1          | 0          | 1          | 1          |
| <b>Leptolepides_sprattiformis</b>   | 0          | 1          | 0          | 2          | 0          | 1          | 1          | 1          | 0          | 1          | 1          |
| <b>Luisichthysvinalaensis</b>       | ?          | 1          | 0          | ?          | ?          | ?          | ?          | 1          | 0          | 0          | 1          |
| <b>Luisiella_feruglioi</b>          | ?          | 1          | 0          | 0          | 0          | 1          | 0&1        | 1          | 0          | 0          | 1          |
| <b>Lycoptera_middendorfi</b>        | ?          | 1          | 0          | 1          | 0          | 0          | ?          | 1          | 0          | 0          | 1          |
| <b>Megalops_atlanticus</b>          | 1          | 1          | 0          | 0          | 1          | ?          | ?          | 1          | 0          | 0          | 1          |
| <b>Notelops_brama</b>               | 0          | 1          | 0          | 2          | 1          | 1          | 0          | 1          | 0          | 0          | 1          |
| <b>Oncorhynchus_mykiss</b>          | 1          | 1          | 0          | 0          | 0          | 0          | ?          | 1          | 0          | 0          | 1          |
| <b>Opsariichthys_bidens</b>         | 1          | 1          | 0          | 0          | 0          | ?          | ?          | 1          | 0          | 0          | 1          |
| <b>Orthogonikleithrus_hoelli</b>    | ?          | 1          | 0          | 2          | 0          | 1          | 1          | 1          | 0          | 1          | 1          |
| <b>Pachythrissops_propterus</b>     | 0          | 1          | 0          | 1          | 1          | 1          | 1          | 1          | 1          | 0          | 1          |
| <b>Pholidophorus_gervasutti</b>     | 1          | 0          | ?          | 0          | 0          | ?          | ?          | 0          | ?          | ?          | ?          |
| <b>Pholidophorus_latiusculus</b>    | ?          | 0          | ?          | 0          | ?          | ?          | ?          | 0          | ?          | ?          | 0          |
| <b>Protoclupea_chilensis</b>        | 1          | 1          | 0          | 0          | 0          | ?          | 0          | 1          | 0          | 0          | 1          |
| <b>Rhacolepis_buccalis</b>          | 0          | 1          | 0          | 2          | ?          | 1          | ?          | 1          | 0          | 0          | 1          |
| <b>Santanaclupea_silvasantosi</b>   | ?          | 1          | 1          | 0          | 0          | 1          | 0          | 1          | 0          | 0          | 1          |
| <b>Siemensichthys_macrocephalus</b> | ?          | 0          | 0          | 0          | ?          | ?          | ?          | 0          | ?          | ?          | 0          |
| <b>Siemensichthys_siemensii</b>     | ?          | 0          | 0          | 0          | ?          | ?          | ?          | 0          | ?          | ?          | ?          |
| <b>Tharrhias_araripis_</b>          | ?          | 1          | 0          | 2          | 0          | ?          | ?          | 1          | 0          | 0          | 1          |
| <b>Tharsis_dubius</b>               | 0          | 1          | 0          | 0          | 0          | 1          | ?          | 1          | 0          | 0          | 1          |
| <b>Thrissops_formosus</b>           | 0          | 1          | 0          | 1          | 1          | 1          | 1          | 1          | 1          | 0          | 1          |
| <b>Thymallus_thymallus</b>          | 1          | 1          | 0          | 0          | 0          | 0          | ?          | 1          | 0          | 0          | 1          |
| <b>Umbra_krameri</b>                | 0          | 1          | 0          | 1          | 0          | 0          | 1          | 1          | 0          | 0          | 1          |
| <b>Varasichthys_ariasi</b>          | 1          | 1          | 0          | 0          | 1          | 1          | 1          | 1          | 0          | 0          | 1          |

| Taxon / Character number              | 125 | 126 | 127 | 128 | 129 | 130 | 131 | 132 | 133 | 134 |
|---------------------------------------|-----|-----|-----|-----|-----|-----|-----|-----|-----|-----|
| <b>Amia_calva</b>                     | 2   | 1   | 0   | 0   | 1   | 0   | 0   | 2   | 0   | 0   |
| <b>Amia_pattersoni</b>                | 2   | 1   | 0   | 0   | 1   | 0   | ?   | ?   | 0   | 0   |
| <b>Lepisosteus_osseus</b>             | 1   | 0   | 0   | 0   | 0&1 | 0   | 0   | 2   | 0   | 0   |
| <b>Obaichthys_decoratus</b>           | ?   | ?   | ?   | ?   | ?   | ?   | 0   | ?   | 0   | 0   |
| <b>Aspidorhynchus_acutirostris</b>    | ?   | 1   | 0   | 0   | 1   | 0   | 0   | ?   | 0   | 0   |
| <b>Belonostomus_tenuirostris</b>      | 2   | 1   | 0   | 0   | ?   | 0   | 0   | 0   | 0   | 0   |
| <b>Hypsocormus_macrodon</b>           | ?   | 0   | 0   | ?   | 1   | 0   | 0   | 1   | 0   | 0   |
| <b>Mesturus_verrucosus</b>            | 0   | 1   | ?   | ?   | ?   | 0   | ?   | ?   | 0   | 0   |
| <b>Pachycormus_macropterus</b>        | ?   | 0   | 0   | 1   | 1   | 0   | 0   | 1   | 0   | 0   |
| <b>Vinctifer_comptoni</b>             | 2   | 1   | ?   | 0   | 1   | 0   | 0   | 2   | 0   | 0   |
| <b>Apsopelix_anglicus</b>             | 0   | 1   | 0   | 0   | 0   | 0   | 0   | 1   | 1   | 1   |
| <b>Allothrissops_mesogaster</b>       | 1   | 1   | 0   | 0   | 1   | 1   | 0   | 1   | 2   | 2   |
| <b>Anaethalion_angustus</b>           | 1   | 1   | 0   | 0   | 0&1 | 0   | ?   | 1   | 1   | ?   |
| <b>Anaethalion_knorri</b>             | 1   | 1   | 0   | 0   | 0   | 0   | 0   | 1   | 1   | 1   |
| <b>Ascalabos_voithii</b>              | 0   | 1   | 0   | 0   | 0   | 1   | 0   | 1   | 1   | 1   |
| <b>Bavarichthys_incognitus</b>        | 1   | 1   | 0   | 0   | ?   | 1   | 0   | 1   | 1   | 1   |
| <b>Cavenderichthys_talbragarensis</b> | 0   | 1   | 0   | 0   | 0&1 | 1   | 0   | 1   | 0   | 0   |
| <b>Brycon_meeki</b>                   | 1   | 1   | 0   | ?   | 1   | 0   | 0   | 1   | 1   | 1   |
| <b>Chanos_chanos</b>                  | ?   | 1   | 0   | 0   | 1   | 0   | 0   | 0   | 1&2 | 2   |
| <b>Chongichthys_dentatus</b>          | 1   | 1   | ?   | ?   | ?   | ?   | ?   | ?   | ?   | ?   |
| <b>Crossognathus_sabaudians</b>       | 0   | 1   | 0   | 0   | 0   | 0   | 0   | 1   | 1   | 1   |
| <b>Denticeps_clupeoides</b>           | 0   | 1   | 0   | 0   | 1   | 0   | 0   | 1   | 1   | 1   |
| <b>Diplomystus_dentatus</b>           | 0   | 1   | 0   | 1   | 1   | 0   | 0   | 1   | 1   | 1   |
| <b>Domeykos_profetaensis</b>          | 1   | 1   | 0   | 0   | 1   | 1   | 0   | 1   | 1   | 1   |
| <b>Dorsetichthys_bechei</b>           | ?   | 1   | 0   | 0   | 0   | 0   | 0   | 1   | 0   | 0   |
| <b>Engraulis_ringens</b>              | ?   | 1   | 0   | ?   | ?   | 0   | 0   | 1   | 1   | 2   |
| <b>Elops_saurus</b>                   | 2   | 1   | 0   | 0   | 0   | 0   | 0   | 1   | 2   | 2   |
| <b>Erichalcis_arcta</b>               | 0&1 | 1   | 1   | 0   | 1   | 0   | 0   | 0   | 2   | 2   |
| <b>Esox_lucius</b>                    | 1&2 | 1   | 0   | 0   | 1   | 0   | 1   | 0   | 2   | 2   |
| <b>Eurycormus_speciosus</b>           | 1   | 1   | 0   | 0   | ?   | 0   | 1   | 0   | 0   | 0   |
| <b>Gordichthys_conquensis</b>         | 0   | 1   | 0   | 0   | 1   | 0   | 0   | 1   | ?   | 1   |



| Taxon / Character number            | 125 | 126 | 127 | 128 | 129 | 130 | 131 | 132 | 133 | 134 |
|-------------------------------------|-----|-----|-----|-----|-----|-----|-----|-----|-----|-----|
| <b>Goulmimichthys_arambourgi</b>    | 1   | 1   | 0   | 0   | ?   | ?   | 0   | ?   | 1   | 1   |
| <b>Hiodon_alosoides</b>             | 1   | 1   | 0   | 0   | 1   | 1   | 0   | 2   | 1   | 1&2 |
| <b>Heterotis_niloticus</b>          | 1&2 | 1   | 0   | 0   | 1   | 0   | 0   | 2   | 1   | 2   |
| <b>Humbertia_operta</b>             | 0   | 1   | 0   | 0   | 0   | 0   | 1   | 0   | 2   | 2   |
| <b>Leptolepis_coryphaenoides</b>    | 0   | 1   | 0   | 0   | 0   | 1   | 0   | 1   | 1   | 1   |
| <b>Leptolepis_koonwarri</b>         | 1   | 1   | 0   | 0   | 1   | 1   | 0   | 1   | 0   | 0   |
| <b>Leptolepides_haerteisi</b>       | 1   | 1   | 1   | 0   | ?   | 1   | 0   | 1   | 1   | 1   |
| <b>Leptolepides_sprattiformis</b>   | 1   | 1   | 1   | 0   | 0&1 | 1   | 0   | 1   | 1   | 1   |
| <b>Luisichthysvinalaensis</b>       | ?   | 1   | 0   | 0   | 0   | 0   | 0   | 1   | 2   | 2   |
| <b>Luisiella_feruglioi</b>          | 0   | 1   | 0   | 0   | 0   | 1   | 0   | 1   | 0   | 0   |
| <b>Lycoptera_middendorfi</b>        | 1   | 1   | 0   | 0   | 1   | 0   | 0   | 2   | 1   | 1&2 |
| <b>Megalops_atlanticus</b>          | 1   | 1   | 0   | 0   | 1   | ?   | 0   | 1   | 1   | 2   |
| <b>Notelops_brama</b>               | 1   | 1   | 0   | 0   | 0   | 1   | 0   | 1   | 2   | 1   |
| <b>Oncorhynchus_mykiss</b>          | 2   | 1   | 1   | 1   | 1   | 0   | 1   | 0   | 1&2 | 2   |
| <b>Opsariichthys_bidens</b>         | 0&1 | 1   | 0   | 0   | 1   | 0   | 0   | 1   | 1   | 2   |
| <b>Orthogonikleithrus_hoelli</b>    | 0   | 1   | 1   | 1   | 1&2 | 1   | 0   | 1   | 1   | 2   |
| <b>Pachythrissops_propterus</b>     | 1   | 1   | 0   | 0   | 1   | 1   | 0   | 2   | 1   | 2   |
| <b>Pholidophorus_gervasutti</b>     | ?   | 1   | ?   | ?   | ?   | ?   | ?   | ?   | ?   | ?   |
| <b>Pholidophorus_latiusculus</b>    | ?   | ?   | ?   | ?   | ?   | ?   | ?   | ?   | ?   | ?   |
| <b>Protoclupea_chilensis</b>        | 1   | 1   | 0   | 0   | 0   | 1   | 0   | 1   | 2   | 2   |
| <b>Rhacolepis_buccalis</b>          | 1   | 1   | 0   | 0   | 0   | 0   | 0   | 1   | 1   | 1   |
| <b>Santanaclupea_silvasantosi</b>   | 0   | 1   | 0   | 0   | 1   | 0   | 0   | 1   | 1   | 1   |
| <b>Siemensichthys_macrocephalus</b> | ?   | 1   | ?   | ?   | ?   | ?   | ?   | ?   | 0   | 0   |
| <b>Siemensichthys_siemensii</b>     | ?   | ?   | ?   | ?   | ?   | ?   | ?   | ?   | ?   | ?   |
| <b>Tharrhias_araripis_</b>          | 1   | 1   | 0   | 0   | 1   | 0   | 0   | ?   | 0&2 | 0&2 |
| <b>Tharsis_dubius</b>               | 1   | 1   | 0   | 0   | 0   | 1   | 0   | 1   | 2   | 2   |
| <b>Thrissops_formosus</b>           | 1   | 1   | 0   | 0   | 0&1 | 1   | 0   | 1   | 2   | 2   |
| <b>Thymallus_thymallus</b>          | 2   | 1   | 0   | 1   | 0   | 0   | 1   | 0   | 2   | 2   |
| <b>Umbra_krameri</b>                | 0   | 1   | 0   | 0   | 1   | 0   | 0   | 0   | 1   | 2   |
| <b>Varasichthys_ariasi</b>          | 1   | 1   | ?   | 0   | 1   | 0   | 0   | 2   | 1   | 2   |

| Taxon / Character number              | 135 | 136 | 137 | 138 | 139 | 140 | 141 | 142 | 143 | 144 |
|---------------------------------------|-----|-----|-----|-----|-----|-----|-----|-----|-----|-----|
| <b>Amia_calva</b>                     | 0   | 0   | 0   | 0   | 1   | 0   | 0   | 1   | 4   | -   |
| <b>Amia_pattersoni</b>                | 0   | 0   | 0   | 0   | 1   | 0   | 0   | 1   | 4   | -   |
| <b>Lepisosteus_osseus</b>             | 0   | 0   | 0   | 0   | 0   | 0   | 1   | 0   | 4   | -   |
| <b>Obaichthys_decoratus</b>           | 0   | 0   | 0   | ?   | 0   | 0   | 1   | ?   | 4   | -   |
| <b>Aspidorhynchus_acutirostris</b>    | 0   | 0   | 1   | 1   | 0   | 0   | 0   | 4   | 3   | 0   |
| <b>Belonostomus_tenuirostris</b>      | 0   | 0   | 1   | 1   | 0   | 0   | 0   | 4   | 3   | 0   |
| <b>Hypsocormus_macrodon</b>           | 0   | 2   | -   | 0   | 0   | 0   | ?   | 0   | 4   | -   |
| <b>Mesturus_verrucosus</b>            | 0   | 0   | ?   | ?   | 0   | 0   | -   | ?   | 4   | -   |
| <b>Pachycormus_macropterus</b>        | 0   | 2   | -   | 0   | 0   | 0   | ?   | 0   | 4   | -   |
| <b>Vinctifer_comptoni</b>             | 0   | 0   | 0   | 0   | ?   | 0   | 0   | 4   | 3   | 0   |
| <b>Apsopelix_anglicus</b>             | 0   | 1   | 0   | 1   | 0   | 0   | ?   | 2&3 | 1   | 0   |
| <b>Allothrissops_mesogaster</b>       | 0   | 1   | 0   | 0&1 | 0   | 0   | 0   | 1   | 0   | 0   |
| <b>Anaethalion_angustus</b>           | 0   | 1   | 0   | 0   | 0   | 1   | 0   | ?   | 2   | 0   |
| <b>Anaethalion_knorri</b>             | 0   | 1   | ?   | 1   | 0   | ?   | 0   | 1   | 2   | ?   |
| <b>Ascalabos_voithii</b>              | 0   | 1   | 0   | 0   | 0   | 0   | 0   | 1   | 0   | 0   |
| <b>Bavarichthys_incognitus</b>        | 0   | 1   | 0   | 1   | 0   | 0   | 0   | 1   | 2   | 0   |
| <b>Cavenderichthys_talbragarensis</b> | 0   | 1   | 0   | 0   | 0   | 0   | 0   | 1   | 1&2 | 0   |
| <b>Brycon_meeki</b>                   | 0   | 1   | 1   | ?   | 0   | 0   | 0   | 1   | 3   | 1   |
| <b>Chanos_chanos</b>                  | 1   | 1   | 0   | ?   | 0   | 0   | 0   | 3   | 3   | ?   |
| <b>Chongichthys_dentatus</b>          | ?   | ?   | ?   | ?   | 0   | ?   | ?   | ?   | ?   | ?   |
| <b>Crossognathus_sabaudians</b>       | 0   | 1   | 0   | 1   | 0   | 0   | ?   | 2&3 | 1   | 0   |
| <b>Denticeps_clupeoides</b>           | 0   | 1   | 0   | 1   | 0   | 0   | 0   | 2   | 3   | ?   |
| <b>Diplomystus_dentatus</b>           | 0   | 1   | 0   | 1   | 0   | 0   | 0   | 1   | 2   | 0   |
| <b>Domeykos_profetaensis</b>          | 0   | 1   | 0   | 0   | 0   | 0   | 0   | 0   | 2   | 0   |
| <b>Dorsetichthys_bechei</b>           | 0   | ?   | 0   | 0   | 0   | 0   | 0   | 0   | 0&1 | 0   |
| <b>Engraulis_ringens</b>              | 1   | 1   | 1   | 0&1 | 0   | 0   | 0   | 2   | 3   | 1   |
| <b>Elops_saurus</b>                   | 1   | 1   | 0   | 0   | 0   | 1   | 0   | 1   | 3   | 0   |
| <b>Erichalcis_arcta</b>               | ?   | 1   | 1   | 1   | 0   | 0   | 0   | 1   | 3   | ?   |
| <b>Esox_lucius</b>                    | 0   | 1   | 1   | 1   | 0   | 0   | 0   | 2   | 3   | 1   |
| <b>Eurycormus_speciosus</b>           | 0   | 0   | 1   | 1   | 0   | 0   | ?   | 0   | 0   | 0   |
| <b>Gordichthys_conquensis</b>         | 0   | 1   | 0   | 0   | 0   | 0   | 0   | 2   | 3   | ?   |

| <b>Taxon / Character number</b>     | <b>135</b> | <b>136</b> | <b>137</b> | <b>138</b> | <b>139</b> | <b>140</b> | <b>141</b> | <b>142</b> | <b>143</b> | <b>144</b> |
|-------------------------------------|------------|------------|------------|------------|------------|------------|------------|------------|------------|------------|
| <b>Goulmimichthys_arambourgi</b>    | 1          | 1          | ?          | ?          | 0          | 0          | ?          | ?          | ?          | ?          |
| <b>Hiodon_alosoides</b>             | 0          | 1          | 0          | 0          | 0          | 0          | 0          | 3          | 3          | 0          |
| <b>Heterotis_niloticus</b>          | 0          | 1          | 0          | 0          | 0          | 0          | 0          | 4          | 4          | -          |
| <b>Humbertia_operta</b>             | 1          | 1          | 1          | 1          | 0          | 0          | 0          | 1          | 2          | 1          |
| <b>Leptolepis_coryphaenoides</b>    | 0          | 1          | 0          | 0          | 0          | 0          | 0          | 0&1        | 0          | 0          |
| <b>Leptolepis_koonwarri</b>         | 0          | 1          | ?          | ?          | 0          | 0          | 0          | 1          | 1          | 0          |
| <b>Leptolepides_haerteisi</b>       | 0          | 1          | 0          | 0          | 0          | 0          | 0          | 1          | 2          | 1          |
| <b>Leptolepides_sprattiformis</b>   | 0          | 1          | 0          | 0          | 0          | 0          | 0          | 1          | 2          | 1          |
| <b>Luisichthysvinalaensis</b>       | 0          | 1          | 0          | 0          | 0          | 0          | 0          | 1          | 2          | 0          |
| <b>Luisiella_feruglioi</b>          | 0          | 1          | 0          | ?          | 0          | 0          | 0          | 1          | 1&2        | 0          |
| <b>Lycoptera_middendorfi</b>        | 0          | 0&1        | 0          | 0          | 0          | 0          | 0          | 1          | 1          | 0          |
| <b>Megalops_atlanticus</b>          | 1          | 1          | 0          | 0          | 0          | 1          | 0          | 1          | 3          | 0          |
| <b>Notelops_brama</b>               | 0          | 1          | 1          | 1          | 0          | 0          | 0          | 2          | ?          | ?          |
| <b>Oncorhynchus_mykiss</b>          | 1          | 1          | 1          | 1          | 0          | 0          | 0          | 1          | 3          | 1          |
| <b>Opsariichthys_bidens</b>         | 1          | 1          | 0          | 0          | 0          | 0          | 0          | 3          | 3          | 1          |
| <b>Orthogonikleithrus_hoelli</b>    | 0          | 1          | 1          | 1          | 0          | 0          | 0          | 1          | 3          | 1          |
| <b>Pachythrissops_properus</b>      | 0          | 1          | 0          | 0          | 0          | 0          | 0          | 1&2        | 1          | 0          |
| <b>Pholidophorus_gervasutti</b>     | ?          | ?          | ?          | ?          | ?          | ?          | ?          | ?          | ?          | ?          |
| <b>Pholidophorus_latiusculus</b>    | ?          | ?          | ?          | ?          | ?          | ?          | ?          | ?          | ?          | ?          |
| <b>Protoclupea_chilensis</b>        | 0          | 1          | 0          | ?          | 0          | 0          | 0          | 1          | 1          | 0          |
| <b>Rhacolepis_buccalis</b>          | 1          | 1          | 0          | 1          | 0          | 0          | ?          | 2          | ?          | ?          |
| <b>Santanaclupea_silvasantosi</b>   | ?          | 1          | 1          | 1          | 0          | 0          | ?          | ?          | ?          | ?          |
| <b>Siemensichthys_macrocephalus</b> | ?          | ?          | ?          | ?          | ?          | ?          | ?          | ?          | ?          | ?          |
| <b>Siemensichthys_siemensii</b>     | ?          | ?          | ?          | ?          | ?          | ?          | ?          | ?          | ?          | ?          |
| <b>Tharrhias_araripis_</b>          | 0          | 1          | ?          | ?          | 0          | 0          | 0          | 2          | 3          | 0          |
| <b>Tharsis_dubius</b>               | 1          | 1          | 0          | 0          | 0          | 0          | 0          | 1          | 0          | 1          |
| <b>Thrissops_formosus</b>           | 0          | 1          | 0          | 0          | 0          | 0          | 0          | 1          | 0          | 0          |
| <b>Thymallus_thymallus</b>          | 1          | 1          | 1          | 1          | 0          | 0          | 0          | 1          | 3          | 1          |
| <b>Umbra_krameri</b>                | 0          | 1          | 1          | 1          | ?          | 0          | 0          | 2          | 3          | 1          |
| <b>Varasichthys_ariasi</b>          | 0          | 1          | 0          | ?          | ?          | 0          | 0          | 3          | 0          | 0          |

| Taxon / Character number              | 145 | 146 | 147 | 148 | 149 | 150 | 151 | 152 | 153 | 154 |
|---------------------------------------|-----|-----|-----|-----|-----|-----|-----|-----|-----|-----|
| <b>Amia_calva</b>                     | -   | -   | -   | -   | -   | 0   | 0   | 1   | 0   | 0   |
| <b>Amia_pattersoni</b>                | -   | -   | -   | -   | -   | 0   | 0   | 1   | 0   | 0   |
| <b>Lepisosteus_osseus</b>             | -   | -   | -   | -   | -   | 0   | 0   | 1   | 0   | 0   |
| <b>Obaichthys_decoratus</b>           | -   | -   | -   | -   | -   | 0   | ?   | -   | -   | 0   |
| <b>Aspidorhynchus_acutirostris</b>    | 2&3 | 0   | 0   | 0   | 0   | 1   | 2   | 1   | 0   | 0   |
| <b>Belonostomus_tenuirostris</b>      | 1&3 | 0   | 0   | 0   | 0   | 1   | 2   | 1   | 0   | 0   |
| <b>Hypsocormus_macrodon</b>           | -   | -   | -   | -   | -   | 1   | 3   | 1   | -   | -   |
| <b>Mesturus_verrucosus</b>            | -   | -   | -   | -   | -   | 0   | ?   | ?   | ?   | 0   |
| <b>Pachycormus_macropterus</b>        | -   | -   | -   | -   | -   | 1   | 3   | 1   | -   | -   |
| <b>Vinctifer_comptoni</b>             | -   | 1   | 0   | ?   | 0   | ?   | 2   | 1   | 0   | 1   |
| <b>Apsopelix_anglicus</b>             | 0   | 0   | 1   | 0   | 0   | 0   | 0   | 0   | ?   | 2   |
| <b>Allothrissops_mesogaster</b>       | 0   | 1   | 1   | 0   | 0   | 0   | 0   | 0   | 0   | 0   |
| <b>Anaethalion_angustus</b>           | ?   | 1   | 0   | 0   | 0   | ?   | 0&1 | 0   | 0   | 1   |
| <b>Anaethalion_knorri</b>             | 1   | 1   | 0   | 0   | 0   | 0   | ?   | 0   | 0   | 1   |
| <b>Ascalabos_voithii</b>              | 0   | 0   | 0   | 0   | 0   | 0   | 0   | 0   | 0&2 | 1   |
| <b>Bavarichthys_incognitus</b>        | 1   | 1   | 0   | 0   | 0   | 0   | 2   | 0   | 2   | 2   |
| <b>Cavenderichthys_talbragarensis</b> | 1   | 0   | 0   | 0   | 0   | 0   | 0   | 0   | 0   | 1   |
| <b>Brycon_meeki</b>                   | 2   | ?   | 0   | 1   | 0   | 0   | 2   | 0   | 0   | 0   |
| <b>Chanos_chanos</b>                  | 2   | ?   | 0   | 1   | 0   | 0   | 2   | 0   | 0   | 0   |
| <b>Chongichthys_dentatus</b>          | ?   | ?   | ?   | ?   | ?   | ?   | ?   | 0   | ?   | ?   |
| <b>Crossognathus_sabaudians</b>       | 0   | 0   | 1   | 0   | 0   | 0   | 0   | 0   | 2   | 2   |
| <b>Denticeps_clupeoides</b>           | 2   | 2   | 0   | 0   | 0   | 0   | 2   | 0   | 1   | 0   |
| <b>Diplomystus_dentatus</b>           | 2   | 2   | 0   | 0   | 0   | 0   | 1   | 0   | 1   | 0   |
| <b>Domeykos_profetaensis</b>          | 0   | 0   | 0   | 0   | 0   | 0   | 0   | 0   | 2   | 1   |
| <b>Dorsetichthys_bechei</b>           | 3   | ?   | 0   | 0   | 0   | 0   | 0   | 1   | 0   | 0   |
| <b>Engraulis_ringens</b>              | 2   | 2   | 0   | 1   | 0   | 0   | ?   | 0   | 1   | 0   |
| <b>Elops_saurus</b>                   | 1   | 1   | 0   | 0   | 0   | 0   | 1   | 0   | 0   | 0   |
| <b>Erichalcis_arcta</b>               | 1   | 2   | 0   | 0   | 1   | 0   | 2   | 0   | 0   | 1   |
| <b>Esox_lucius</b>                    | 2   | 2   | 0   | 0   | 1   | 0   | 2   | 0   | 0   | 0   |
| <b>Eurycormus_speciosus</b>           | 0&1 | ?   | 0   | 0   | 0   | 1   | 0   | 1   | 0   | 0   |
| <b>Gordichthys_conquensis</b>         | 1   | 2   | 0   | 0   | 0   | 0   | 2   | 0   | 0   | 0   |

| <b>Taxon / Character number</b>     | <b>145</b> | <b>146</b> | <b>147</b> | <b>148</b> | <b>149</b> | <b>150</b> | <b>151</b> | <b>152</b> | <b>153</b> | <b>154</b> |
|-------------------------------------|------------|------------|------------|------------|------------|------------|------------|------------|------------|------------|
| <b>Goulmimichthys_arambourgi</b>    | 0          | 1          | ?          | 0          | 0          | ?          | 2          | 0          | 0          | 2          |
| <b>Hiodon_alosoides</b>             | 1          | 1          | 0          | 0          | 0          | 0          | 1          | 0          | 0          | 0          |
| <b>Heterotis_niloticus</b>          | -          | -          | -          | -          | -          | 0          | 2          | 0          | 0          | 0          |
| <b>Humbertia_operta</b>             | 1          | 1          | 0          | 0          | 1          | 0          | 2          | 0          | 0          | 0          |
| <b>Leptolepis_coryphaenoides</b>    | 0          | 0          | 0          | 0          | 0          | 0          | 0          | 0          | 2          | 1          |
| <b>Leptolepis_koonwarri</b>         | 1&2        | 1          | 0          | 0          | 0          | 0          | 0          | 0          | 0&2        | 0          |
| <b>Leptolepides_haerteisi</b>       | 1          | 1          | 0          | 0          | 1          | 0          | ?          | 0          | 0&2        | 1          |
| <b>Leptolepides_sprattiformis</b>   | 1          | 1          | 0          | 0          | 1          | 0          | 0&1        | 0          | 0          | 1          |
| <b>Luisichthysvinalaensis</b>       | 0          | 1          | 0          | 0          | 0          | 0          | 0          | 0          | 1          | ?          |
| <b>Luisiella_feruglioi</b>          | 1          | 0          | 0          | 0          | 0          | 0          | 0          | 0          | 0          | 0&1        |
| <b>Lycoptera_middendorfi</b>        | 1          | 0          | 0          | 0          | 0          | 0          | 1          | 0&1        | 0          | 0          |
| <b>Megalops_atlanticus</b>          | 1          | 1          | 0          | 0          | 0          | 0          | 1          | 0          | ?          | 0          |
| <b>Notelops_brama</b>               | 2          | 1          | 0          | 0          | 0          | 0          | ?          | 0          | 2          | 2          |
| <b>Oncorhynchus_mykiss</b>          | 1          | 2          | 0          | 0          | 1          | 0          | 2          | 0          | 0          | 0          |
| <b>Opsariichthys_bidens</b>         | 2          | 2          | 0          | 1          | 0          | 0          | 2          | 0          | ?          | 0          |
| <b>Orthogonikleithrus_hoelli</b>    | 1          | 1          | 0          | 0          | 1          | 0          | 2          | 0          | 0          | 1          |
| <b>Pachythrissops_propterus</b>     | 1          | 0          | 0          | 0          | 0          | 0          | 0          | 0          | 0          | 0&1        |
| <b>Pholidophorus_gervasutti</b>     | ?          | ?          | ?          | ?          | ?          | ?          | ?          | ?          | ?          | ?          |
| <b>Pholidophorus_latiusculus</b>    | ?          | ?          | ?          | ?          | ?          | ?          | ?          | ?          | ?          | ?          |
| <b>Protoclupea_chilensis</b>        | 0          | 1          | 0          | 0          | 0          | 0          | 0          | 0          | 0          | ?          |
| <b>Rhacolepis_buccalis</b>          | 2          | 1          | 0          | 0          | 0          | 0          | ?          | 0          | 2          | 0&2        |
| <b>Santanaclupea_silvasantosi</b>   | 2          | 2          | 0          | 0          | 0          | 0          | 2          | 0          | 1          | 0          |
| <b>Siemensichthys_macrocephalus</b> | ?          | ?          | ?          | ?          | ?          | ?          | ?          | ?          | ?          | ?          |
| <b>Siemensichthys_siemensii</b>     | ?          | ?          | ?          | ?          | ?          | ?          | ?          | ?          | ?          | ?          |
| <b>Tharrhias_araripis_</b>          | 1          | 2          | 0          | 0          | 0          | 0          | 2          | 0          | ?          | 0          |
| <b>Tharsis_dubius</b>               | 0          | 0          | 0          | 0          | 0          | 0          | 0          | 0          | 0          | 1          |
| <b>Thrissops_formosus</b>           | 0          | 0          | 1          | ?          | 0          | 0          | 0          | 0          | 0          | 0          |
| <b>Thymallus_thymallus</b>          | 1          | 2          | 0          | ?          | 1          | 0          | 2          | 0          | 0          | 0          |
| <b>Umbra_krameri</b>                | 2          | 2          | 0          | ?          | 1          | 0          | 2          | 0          | 0          | 0          |
| <b>Varasichthys_ariasi</b>          | 0          | 0          | 0          | ?          | 0          | 0          | ?          | 0          | 0          | 0          |

| Taxon / Character number              | 155 | 156 | 157 | 158 | 159 | 160 | 161 | 162 | 163 | 164 |
|---------------------------------------|-----|-----|-----|-----|-----|-----|-----|-----|-----|-----|
| <b>Amia_calva</b>                     | -   | 0   | 0   | 1   | 1   | 1   | 1   | 2   | 1&2 | 0   |
| <b>Amia_pattersoni</b>                | -   | 0   | 0   | 1   | 1   | 1   | 1   | 2   | 2   | 0   |
| <b>Lepisosteus_osseus</b>             | -   | 0   | 0   | 1   | 0   | 0   | 0   | 0   | 2   | 2   |
| <b>Obaichthys_decoratus</b>           | -   | 0   | ?   | 1   | ?   | 0   | 0   | 0   | ?   | ?   |
| <b>Aspidorhynchus_acutirostris</b>    | -   | 0   | 1   | 0   | 0   | 0   | 0&1 | 0   | 0&2 | 0   |
| <b>Belonostomus_tenuirostris</b>      | -   | 1   | 1   | 0   | 0   | 0   | 0   | 0   | 1&2 | 2   |
| <b>Hypsocormus_macrodon</b>           | -   | -   | -   | 0   | 0   | 0   | 0   | 0   | 0   | 0   |
| <b>Mesturus_verrucosus</b>            | -   | ?   | 1   | 1   | ?   | 1   | 0   | 2   | 0   | 0   |
| <b>Pachycormus_macropterus</b>        | -   | -   | -   | 0   | 0   | 0   | 0   | 0   | 0   | 0   |
| <b>Vinctifer_comptoni</b>             | -   | 0   | 1   | 0   | 0   | 1   | 1   | ?   | 0   | 0   |
| <b>Apsopelix_anglicus</b>             | 0   | 0   | ?   | 1   | 1   | 1   | 1   | ?   | 1   | 0   |
| <b>Allothrissops_mesogaster</b>       | 0   | 1   | 1   | 0   | 1   | 1   | 1   | 2   | 1   | 0   |
| <b>Anaethalion_angustus</b>           | ?   | 1   | 1   | 0   | 1   | 1   | 0   | 1   | 1   | 0   |
| <b>Anaethalion_knorri</b>             | 0   | 1   | 1   | 0   | 1   | 1   | 0   | 1   | 1   | 0   |
| <b>Ascalabos_voithii</b>              | 0   | 1   | 1   | 0   | 0   | 1   | 1   | 2   | 1   | 0   |
| <b>Bavarichthys_incognitus</b>        | 0   | 1   | 1   | 0   | 1   | 1   | 0   | 1   | 1   | 0   |
| <b>Cavenderichthys_talbragarensis</b> | 0   | 1   | 1   | 0   | 0   | 1   | 0   | 1   | 1   | 0   |
| <b>Brycon_meeki</b>                   | 1   | 1   | 1   | 0   | 1   | 1   | 1   | 2   | 1   | 0   |
| <b>Chanos_chanos</b>                  | 1   | 1   | 1   | 0   | 1   | ?   | 1   | 2   | 1   | 0   |
| <b>Chongichthys_dentatus</b>          | ?   | ?   | ?   | ?   | ?   | 1   | ?   | ?   | ?   | ?   |
| <b>Crossognathus_sabaudians</b>       | 0   | 0   | 1   | 0   | 1   | 1   | 1   | ?   | 1   | 0   |
| <b>Denticeps_clupeoides</b>           | 0   | 1   | 1   | 1   | 1   | ?   | 1   | 2   | 2   | 0   |
| <b>Diplomystus_dentatus</b>           | 0   | 1   | 1   | 0   | 1   | 1   | 1   | 2   | 1   | 0   |
| <b>Domeykos_profetaensis</b>          | 0   | 1   | 1   | ?   | 0   | 1   | 1   | ?   | 0   | 0   |
| <b>Dorsetichthys_bechei</b>           | 0   | 0   | 1   | 0   | 0   | 0   | 0   | 0   | 0   | 0   |
| <b>Engraulis_ringens</b>              | 0   | 1   | 1   | 1   | 1   | 1   | 1   | 2   | 1   | 0   |
| <b>Elops_saurus</b>                   | 0   | 1   | 1   | 0   | 1   | ?   | 1   | 2   | 1   | 0   |
| <b>Erichalcis_arcta</b>               | 0   | 0   | 1   | 0   | 1   | 1   | 1   | 2   | 1   | 0   |
| <b>Esox_lucius</b>                    | 0   | 1   | 1   | 1   | 1   | ?   | 1   | 2   | 1   | 0   |
| <b>Eurycormus_speciosus</b>           | 0   | 1   | 1   | 0   | 0   | 0   | 0   | 0   | 0   | 0   |
| <b>Gordichthys_conquensis</b>         | 0   | 1   | 1   | 1   | 1   | 1   | 1   | 2   | 1   | 0   |

| <b>Taxon / Character number</b>     | <b>155</b> | <b>156</b> | <b>157</b> | <b>158</b> | <b>159</b> | <b>160</b> | <b>161</b> | <b>162</b> | <b>163</b> | <b>164</b> |
|-------------------------------------|------------|------------|------------|------------|------------|------------|------------|------------|------------|------------|
| <b>Goulmimichthys_arambourgi</b>    | 0          | 1          | 1          | 0          | ?          | 1          | ?          | ?          | ?          | ?          |
| <b>Hiodon_alosoides</b>             | 0          | 1          | 1          | 1          | 1          | 1          | 1          | 2          | 2          | 1          |
| <b>Heterotis_niloticus</b>          | 0          | 1          | 1          | 1          | 1          | 1          | 1          | 2          | 2          | 2          |
| <b>Humbertia_operta</b>             | 1          | 1          | 1          | 0          | 1          | ?          | 1          | 2          | 1          | 0          |
| <b>Leptolepis_coryphaenoides</b>    | 0          | 0          | 1          | 0          | 0          | 1          | 0          | 0          | 1          | 0          |
| <b>Leptolepis_koonwarri</b>         | 0          | 0          | 1          | 0          | 0          | 1          | ?          | ?          | 1          | 0          |
| <b>Leptolepides_haerteisi</b>       | 0          | 0          | 1          | 0          | 1          | 1          | 1          | 2          | 1          | 0          |
| <b>Leptolepides_sprattiformis</b>   | 0          | 0          | 1          | 0          | 1          | 1          | 1          | 2          | 1          | 0          |
| <b>Luisichthysvinalaensis</b>       | 0          | 1          | 1          | 0          | 0          | ?          | 1          | 1          | 0          | 0          |
| <b>Luisiella_feruglioi</b>          | 0          | 0          | 1          | 0          | 0          | 1          | 0          | 1          | 1          | 0          |
| <b>Lycoptera_middendorfi</b>        | 0          | 1          | 1          | 1          | 1          | 1          | 1          | ?          | 2          | 1          |
| <b>Megalops_atlanticus</b>          | 0          | 1          | 1          | 0          | 1          | ?          | 1          | ?          | 1          | 0          |
| <b>Notelops_brama</b>               | 0          | 0          | 1          | 0          | 1          | 1          | 1          | 2          | 1          | 0          |
| <b>Oncorhynchus_mykiss</b>          | 0          | 1          | 1          | 1          | 1          | 1          | 1          | 2          | 1          | 0          |
| <b>Opsariichthys_bidens</b>         | 1          | 1          | 1          | 0          | 1          | 1          | 1          | 2          | 1          | 0          |
| <b>Orthogonikleithrus_hoelli</b>    | 0          | 0          | 1          | 0          | 1          | 1          | 1          | 2          | 1          | 0          |
| <b>Pachythrissops_propterus</b>     | 0          | 1          | 1          | 0          | 0          | 1          | 0          | 0          | 1          | 0          |
| <b>Pholidophorus_gervasutti</b>     | ?          | ?          | ?          | 0          | 0          | 0          | 0          | 0          | 0          | 0          |
| <b>Pholidophorus_latiusculus</b>    | ?          | ?          | ?          | 0          | 0          | 0          | 0          | 0          | 0          | 0          |
| <b>Protoclupea_chilensis</b>        | 0          | 1          | 1          | 0          | 1          | 1          | 1          | 2          | 0          | 0          |
| <b>Rhacolepis_buccalis</b>          | 0          | 0          | 1          | 0          | 1          | 1          | 1          | 2          | 1          | 0          |
| <b>Santanaclupea_silvasantosi</b>   | 0          | 1          | 1          | 0          | 1          | 1          | 1          | 2          | 1          | 0          |
| <b>Siemensichthys_macrocephalus</b> | ?          | ?          | ?          | 0          | 0          | 0          | 0          | ?          | ?          | ?          |
| <b>Siemensichthys_siemensii</b>     | ?          | ?          | ?          | 0          | ?          | 0          | 0          | 0          | 0          | 0          |
| <b>Tharrhias_araripis_</b>          | 0          | 1          | 1          | 0          | ?          | 1          | ?          | ?          | 1          | ?          |
| <b>Tharsis_dubius</b>               | 0          | 0          | 1          | 0          | 0          | 1          | 0          | 1          | 1          | 0          |
| <b>Thrissops_formosus</b>           | ?          | 1          | 1          | 0          | 1          | 1          | 1          | 2          | 1          | 0          |
| <b>Thymallus_thymallus</b>          | ?          | 1          | 1          | 1          | 1          | ?          | 1          | 2          | 1          | 0          |
| <b>Umbra_krameri</b>                | ?          | 1          | 1          | 0          | 1          | ?          | 1          | 2          | 2          | 2          |
| <b>Varasichthys_ariasi</b>          | ?          | 1          | 1          | 0          | 0          | 1          | 1          | 1          | 0          | 0          |

| Taxon / Character number              | 165 | 166 | 167 | 168 | 169 | 170 | 171 | 172 | 173 | 174 |
|---------------------------------------|-----|-----|-----|-----|-----|-----|-----|-----|-----|-----|
| <b>Amia_calva</b>                     | -   | 0   | 1   | 0   | 0   | 1   | 2   | 1   | 0   | 2   |
| <b>Amia_pattersoni</b>                | -   | 0   | 1   | 0   | 0   | 1   | 2   | 1   | 0   | 2   |
| <b>Lepisosteus_osseus</b>             | -   | 2   | 1   | 0   | 0   | 1   | 2   | 1   | 0   | 2   |
| <b>Obaichthys_decoratus</b>           | -   | ?   | 1   | ?   | ?   | 1   | 2   | 1   | ?   | 2   |
| <b>Aspidorhynchus_acutirostris</b>    | 0&2 | 0   | 0   | 0   | 0   | 0   | 1   | 0   | 0   | 2   |
| <b>Belonostomus_tenuirostris</b>      | ?   | 0   | 0   | 0   | 0   | 0   | 1   | 0   | 0   | 2   |
| <b>Hypsocormus_macrodon</b>           | 0   | 0   | -   | 1   | ?   | 0   | ?   | 0   | 0   | 2   |
| <b>Mesturus_verrucosus</b>            | 0   | 1   | ?   | ?   | ?   | 0   | ?   | 0   | ?   | ?   |
| <b>Pachycormus_macropterus</b>        | 0   | 0   | -   | 1   | 0   | 0   | ?   | 0   | 0   | 2   |
| <b>Vinctifer_comptoni</b>             | 0   | 0   | 0   | 0   | 0   | 0   | 1   | 0   | 0   | 2   |
| <b>Apsopelix_anglicus</b>             | 1   | 1   | 1   | 1   | 1   | 0   | 1   | 0   | 0   | 0   |
| <b>Allothrissops_mesogaster</b>       | 1   | 1   | 0   | 1   | 1   | 0   | 1   | 0   | 0   | 0&1 |
| <b>Anaethalion_angustus</b>           | 1   | 1   | 1   | 0   | 0   | 0   | 1   | 0   | 0   | 1   |
| <b>Anaethalion_knorri</b>             | 1   | 1   | 1   | 0   | 0   | 0   | 1   | 0   | 0   | 1   |
| <b>Ascalabos_voithii</b>              | 1   | 1   | 0   | 1   | 1   | 0   | 1   | 0   | 0   | 0   |
| <b>Bavarichthys_incognitus</b>        | 1   | 1   | 0   | 0   | 0   | 0   | 1   | 0   | 0   | 0   |
| <b>Cavenderichthys_talbragarensis</b> | 1   | 1   | 0   | 1   | 1   | 0   | 1   | 0   | 0   | 0   |
| <b>Brycon_meeki</b>                   | 1   | 1   | 1   | 0   | ?   | 1   | ?   | 0   | 0   | 2   |
| <b>Chanos_chanos</b>                  | 1   | 1   | 0   | 0   | ?   | 0   | ?   | 0   | 0   | 2   |
| <b>Chongichthys_dentatus</b>          | ?   | ?   | ?   | ?   | ?   | ?   | 1   | 0   | ?   | ?   |
| <b>Crossognathus_sabaudians</b>       | 1   | 1   | 1   | 1   | 1   | 0   | 1   | 0   | 0   | 0   |
| <b>Denticeps_clupeoides</b>           | 1   | 1   | 1   | 0   | 0   | 1   | ?   | 0   | 0   | 2   |
| <b>Diplomystus_dentatus</b>           | 1   | 1   | 1   | 0   | 0   | ?   | 1   | 0   | 0   | 2   |
| <b>Domeykos_profetaensis</b>          | 0   | 1   | 0   | 1   | 1   | 0   | 1   | 0   | 0   | ?   |
| <b>Dorsetichthys_bechei</b>           | 0   | 0   | 0   | 1   | 1   | 0   | 1   | 0   | 0   | 2   |
| <b>Engraulis_ringens</b>              | 1   | 1   | 1   | 0   | ?   | 1   | ?   | 0   | 0   | 2   |
| <b>Elops_saurus</b>                   | 1   | 1   | 1   | 0   | 1   | 0   | 1   | 0   | 0   | 1   |
| <b>Erichalcis_arcta</b>               | 1   | 1   | 1   | 1   | ?   | 1   | ?   | 0   | 0   | 1   |
| <b>Esox_lucius</b>                    | 1   | 1   | 1   | 0   | 0   | 1   | 1   | 0   | 0   | 2   |
| <b>Eurycormus_speciosus</b>           | 0   | 0   | 0   | 1   | ?   | 0   | ?   | 0   | 1   | 2   |
| <b>Gordichthys_conquensis</b>         | 1   | 1   | 0   | ?   | ?   | 1   | ?   | 0   | 0   | 2   |



| <b>Taxon / Character number</b>     | <b>165</b> | <b>166</b> | <b>167</b> | <b>168</b> | <b>169</b> | <b>170</b> | <b>171</b> | <b>172</b> | <b>173</b> | <b>174</b> |
|-------------------------------------|------------|------------|------------|------------|------------|------------|------------|------------|------------|------------|
| <b>Goulmimichthys_arambourgi</b>    | ?          | ?          | ?          | ?          | ?          | ?          | 1          | 0          | 0          | ?          |
| <b>Hiodon_alosoides</b>             | 2          | 1          | 1          | 0          | 0          | 0          | 1          | 0          | 0          | 2          |
| <b>Heterotis_niloticus</b>          | 2          | 1          | 1          | 0          | ?          | 1          | ?          | 0          | 0          | 2          |
| <b>Humbertia_operta</b>             | 1          | 1          | 1          | 0          | 0          | 1          | 1          | 0          | 0          | 1          |
| <b>Leptolepis_coryphaenoides</b>    | 1          | 1          | 0          | 1          | 1          | 0          | 1          | 0          | 0          | 0          |
| <b>Leptolepis_koonwarri</b>         | 1          | 1          | 0          | ?          | ?          | 0          | 1          | 0          | 0          | ?          |
| <b>Leptolepides_haerteisi</b>       | 1          | 1          | 1          | 1          | 0          | 1          | 1          | 0          | 0          | 1          |
| <b>Leptolepides_sprattiformis</b>   | 1          | 1          | 0          | 1          | 0          | 1          | 1          | 0          | 0          | 1          |
| <b>Luisichthysvinalaensis</b>       | 0          | 1          | 0          | ?          | 1          | 0          | 1          | 0          | 0          | ?          |
| <b>Luisiella_feruglioi</b>          | 1          | 1          | 0          | 1          | 1          | 0          | 1          | 0          | 0          | 0          |
| <b>Lycoptera_middendorfi</b>        | 2          | 1          | 1          | 0          | 0          | 0          | 1          | 0          | 0          | 2          |
| <b>Megalops_atlanticus</b>          | 1          | 1          | 1          | 0          | ?          | 0          | ?          | 0          | 0          | 1          |
| <b>Notelops_brama</b>               | 1          | 1          | 0          | ?          | 0          | 0          | 0          | 0          | 0          | ?          |
| <b>Oncorhynchus_mykiss</b>          | 1          | 1          | 1          | 0          | 0          | 1          | 1          | 0          | 0          | 2          |
| <b>Opsariichthys_bidens</b>         | 1          | 1          | 1          | 0          | ?          | 0          | ?          | 0          | 0          | 2          |
| <b>Orthogonikleithrus_hoelli</b>    | 1          | 1          | 1          | 0          | 1          | 1          | 1          | 0          | 0          | 1          |
| <b>Pachythrissops_propterus</b>     | 1          | 1          | 0          | 1          | 1          | 0          | 1          | 0          | 0          | 1          |
| <b>Pholidophorus_gervasutti</b>     | 0          | 0          | ?          | 0          | ?          | 1          | ?          | 0          | 0          | 2          |
| <b>Pholidophorus_latiusculus</b>    | ?          | 0          | ?          | 0          | ?          | 1          | ?          | 0          | ?          | 2          |
| <b>Protoclupea_chilensis</b>        | 0          | 1          | ?          | ?          | 0          | 0          | 1          | 0          | ?          | ?          |
| <b>Rhacolepis_buccalis</b>          | 1          | 1          | 1          | ?          | 1          | 0          | 0          | 0          | 0          | ?          |
| <b>Santanaclupea_silvasantosi</b>   | 1          | 1          | 1          | ?          | 0          | ?          | 0          | 0          | 0          | ?          |
| <b>Siemensichthys_macrocephalus</b> | ?          | ?          | ?          | ?          | ?          | 0          | ?          | 0          | ?          | ?          |
| <b>Siemensichthys_siemensii</b>     | ?          | ?          | ?          | ?          | 0          | 0          | ?          | 0          | ?          | ?          |
| <b>Tharrhias_araripis_</b>          | 1          | 1          | ?          | ?          | ?          | 0          | 0          | 0          | 0          | ?          |
| <b>Tharsis_dubius</b>               | 1          | 1          | 0          | 1          | 1          | 0          | 1          | 0          | 0          | 0          |
| <b>Thrissops_formosus</b>           | 1          | 1          | 0          | 1          | 1          | 0          | 1          | 0          | 0          | 1          |
| <b>Thymallus_thymallus</b>          | 1          | 1          | 1          | 0          | ?          | 1          | ?          | 0          | 0          | 2          |
| <b>Umbra_krameri</b>                | 2          | 1          | 1          | 0          | ?          | 1          | 1          | 1          | 0          | 2          |
| <b>Varasichthys_ariasi</b>          | 0          | 1          | 0          | ?          | 1          | 0          | 1          | 0          | 0          | 0          |

| <b>Taxon / Character number</b>       | <b>175</b> | <b>176</b> | <b>177</b> | <b>178</b> |
|---------------------------------------|------------|------------|------------|------------|
| <b>Amia_calva</b>                     | 2          | -          | -          | 0          |
| <b>Amia_pattersoni</b>                | 2          | -          | -          | ?          |
| <b>Lepisosteus_osseus</b>             | 0          | -          | -          | 0          |
| <b>Obaichthys_decoratus</b>           | 0          | -          | -          | ?          |
| <b>Aspidorhynchus_acutirostris</b>    | 0          | -          | -          | ?          |
| <b>Belonostomus_tenuirostris</b>      | 0          | -          | -          | ?          |
| <b>Hypsocormus_macrodon</b>           | 2          | -          | -          | ?          |
| <b>Mesturus_verrucosus</b>            | 0          | -          | -          | 0          |
| <b>Pachycormus_macropterus</b>        | 2          | -          | -          | ?          |
| <b>Vinctifer_comptoni</b>             | 0          | -          | -          | ?          |
| <b>Apsopelix_anglicus</b>             | 1          | ?          | 0          | ?          |
| <b>Allothrissops_mesogaster</b>       | 1          | 0          | 1          | 0          |
| <b>Anaethalion_angustus</b>           | 1          | 1          | 0          | 1          |
| <b>Anaethalion_knorri</b>             | 1          | 1          | 0          | 1          |
| <b>Ascalabos_voithii</b>              | 1          | 0          | 0          | 0          |
| <b>Bavarichthys_incognitus</b>        | ?          | ?          | ?          | ?          |
| <b>Cavenderichthys_talbragarensis</b> | 1          | 0          | 0          | ?          |
| <b>Brycon_meeki</b>                   | 1          | 0          | 0          | 0          |
| <b>Chanos_chanos</b>                  | 1          | 1          | 0          | 0          |
| <b>Chongichthys_dentatus</b>          | 1          | 0          | 0          | ?          |
| <b>Crossognathus_sabaudians</b>       | 1          | 0          | 0          | ?          |
| <b>Denticeps_clupeoides</b>           | 1          | ?          | 0          | 0          |
| <b>Diplomystus_dentatus</b>           | 1          | 0          | 0          | 0          |
| <b>Domeykos_profetaensis</b>          | 1          | 1          | 1          | ?          |
| <b>Dorsetichthys_bechei</b>           | 0          | -          | -          | ?          |
| <b>Engraulis_ringens</b>              | 1          | 0          | 0          | 0          |
| <b>Elops_saurus</b>                   | 1          | 1          | 0          | 1          |
| <b>Erichalcis_arcta</b>               | ?          | 0          | 0          | ?          |
| <b>Esox_lucius</b>                    | 1          | 0          | 0          | 0          |
| <b>Eurycormus_speciosus</b>           | 2          | 1          | 0          | ?          |
| <b>Gordichthys_conquensis</b>         | 1          | ?          | 0          | 0          |

| <b>Taxon / Character number</b>     | <b>175</b> | <b>176</b> | <b>177</b> | <b>178</b> |
|-------------------------------------|------------|------------|------------|------------|
| <b>Goulmimichthys_arambourgi</b>    | 1          | ?          | 0          | ?          |
| <b>Hiodon_alosoides</b>             | 1          | 0          | 2          | 0          |
| <b>Heterotis_niloticus</b>          | 1          | 0          | 2          | 0          |
| <b>Humbertia_operta</b>             | 1          | 0          | 0          | 0          |
| <b>Leptolepis_coryphaenoides</b>    | 1          | 0          | 0          | 0          |
| <b>Leptolepis_koonwarri</b>         | 1          | ?          | 0          | ?          |
| <b>Leptolepides_haerteisi</b>       | 1          | ?          | 0          | ?          |
| <b>Leptolepides_sprattiformis</b>   | 1          | 1          | 0          | 0          |
| <b>Luisichthysvinalaensis</b>       | 1          | 1          | 1          | ?          |
| <b>Luisiella_feruglioi</b>          | 1          | 0          | 0          | ?          |
| <b>Lycoptera_middendorfi</b>        | 1          | 0          | 2          | 0          |
| <b>Megalops_atlanticus</b>          | 1          | 1          | 0          | 1          |
| <b>Notelops_brama</b>               | 1          | 0          | 0          | ?          |
| <b>Oncorhynchus_mykiss</b>          | 1          | 0          | 0          | 0          |
| <b>Opsariichthys_bidens</b>         | 1          | 1          | 0          | 0          |
| <b>Orthogonikleithrus_hoelli</b>    | ?          | ?          | ?          | ?          |
| <b>Pachythrissops_propterus</b>     | 1          | 1          | 0          | ?          |
| <b>Pholidophorus_gervasutti</b>     | 0          | -          | -          | ?          |
| <b>Pholidophorus_latiusculus</b>    | 0          | -          | -          | ?          |
| <b>Protoclupea_chilensis</b>        | 1          | 1          | 1          | ?          |
| <b>Rhacolepis_buccalis</b>          | 1          | ?          | 1          | ?          |
| <b>Santanaclupea_silvasantosi</b>   | 1          | ?          | 0          | ?          |
| <b>Siemensichthys_macrocephalus</b> | 0          | -          | -          | ?          |
| <b>Siemensichthys_siemensii</b>     | 0          | -          | -          | ?          |
| <b>Tharrhias_araripis_</b>          | 1          | 0          | 0          | ?          |
| <b>Tharsis_dubius</b>               | 1          | 0          | 0          | 0          |
| <b>Thrissops_formosus</b>           | 1          | ?          | 0          | 0          |
| <b>Thymallus_thymallus</b>          | 1          | 0          | 0          | 0          |
| <b>Umbra_krameri</b>                | 1          | 0          | 0          | 0          |
| <b>Varasichthys_ariasi</b>          | 1          | 1          | 1          | 0          |

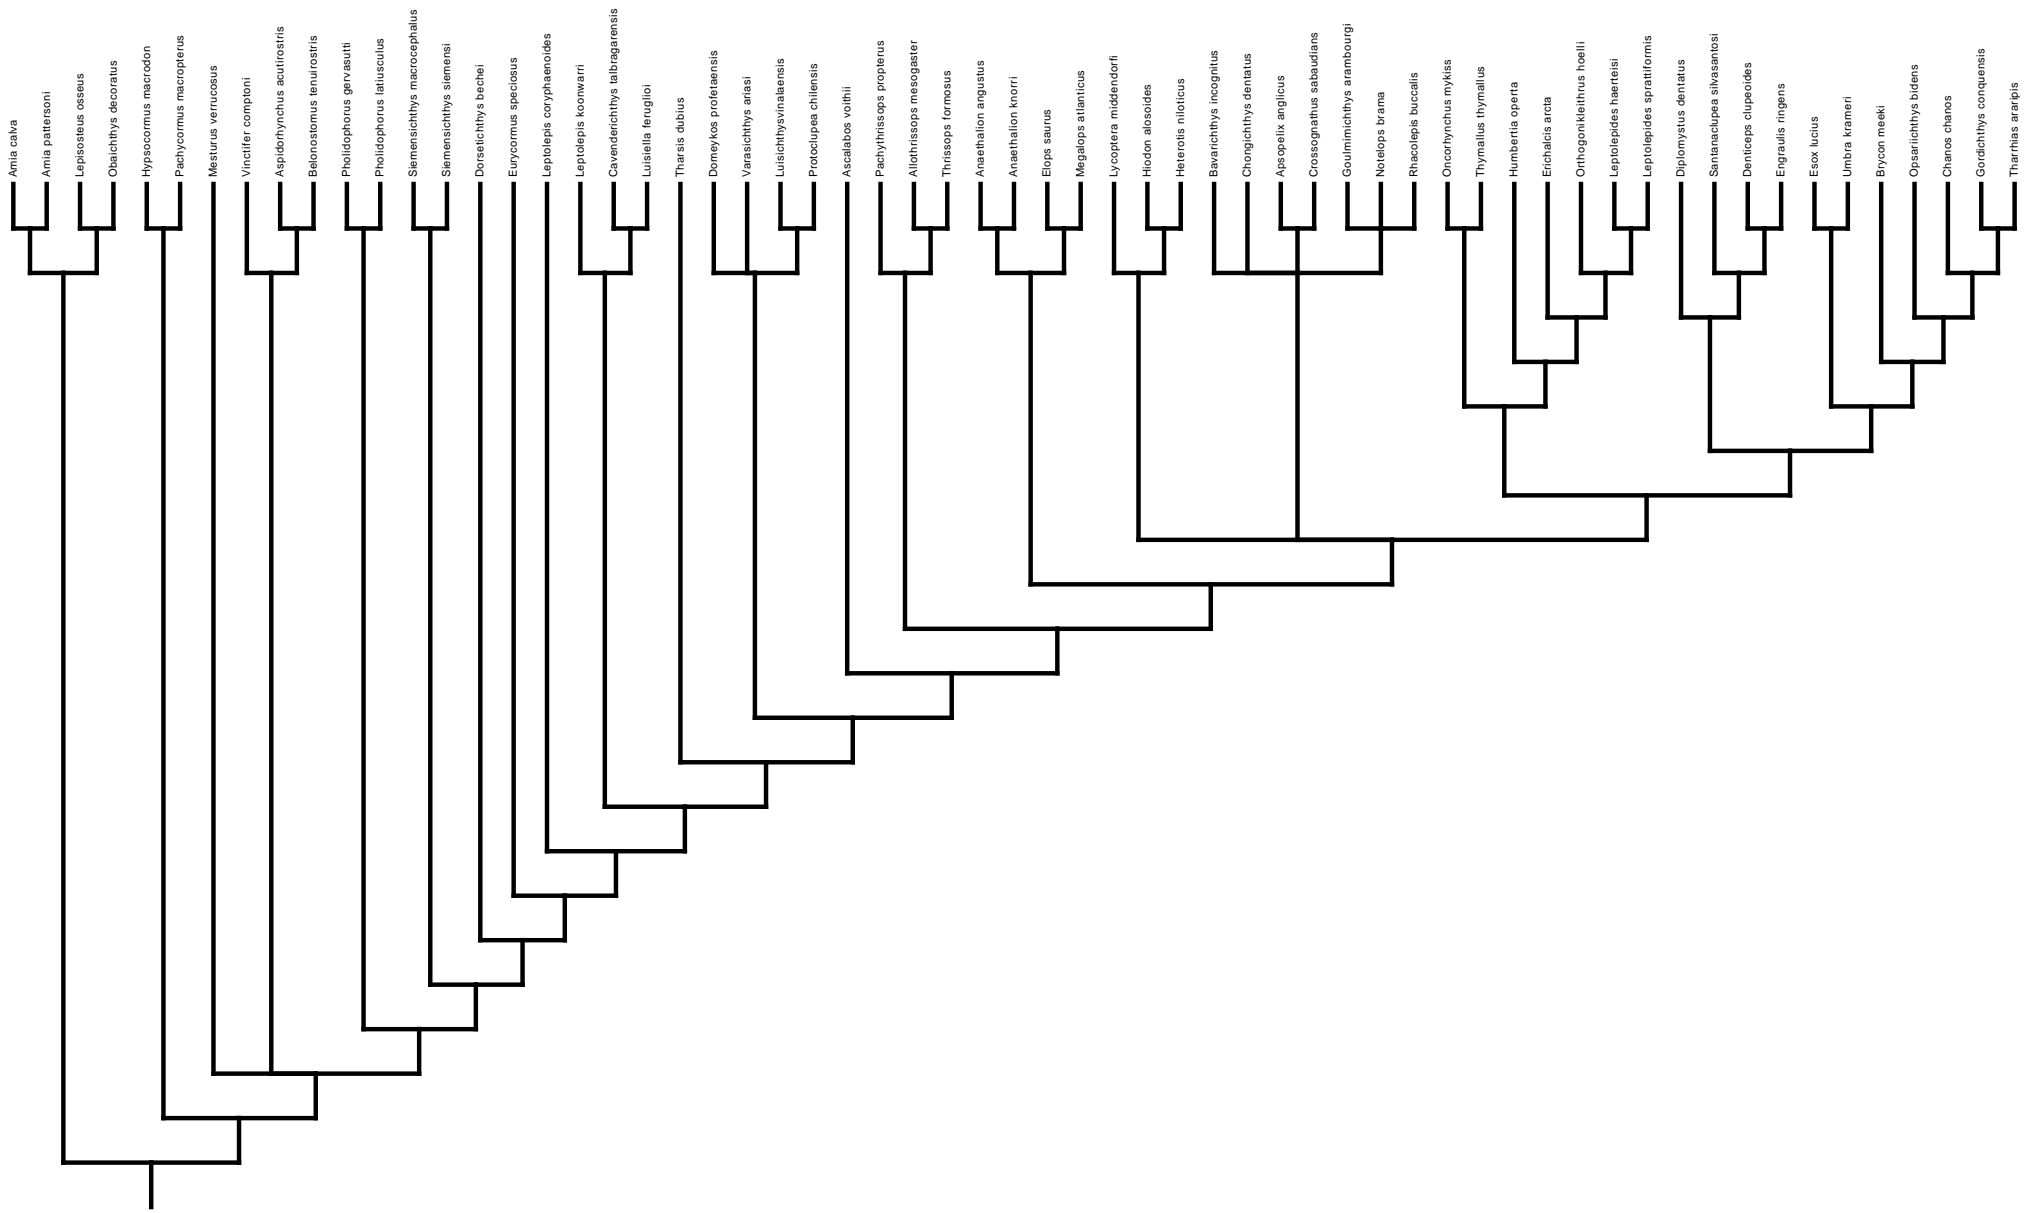

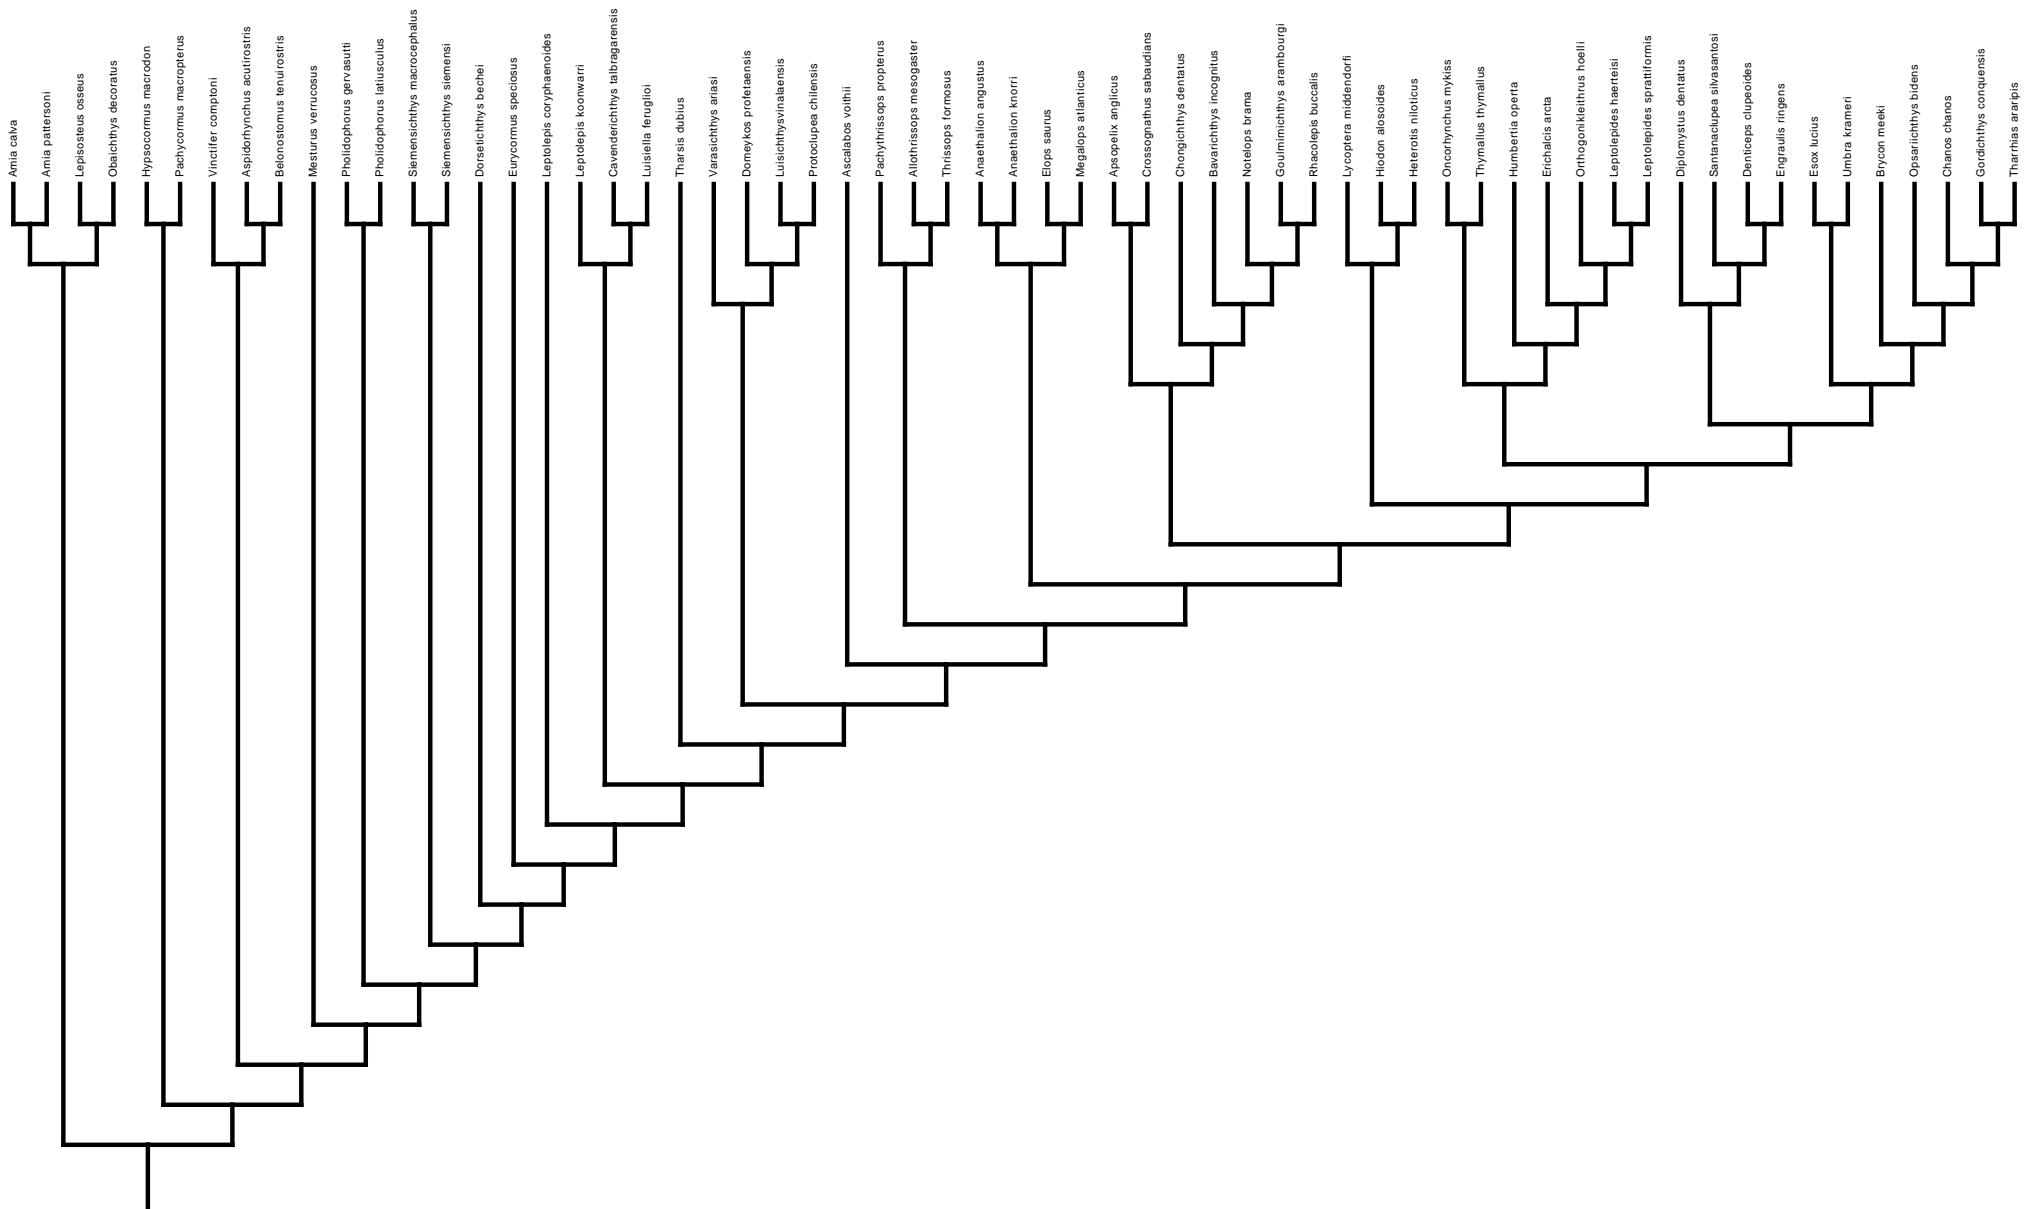

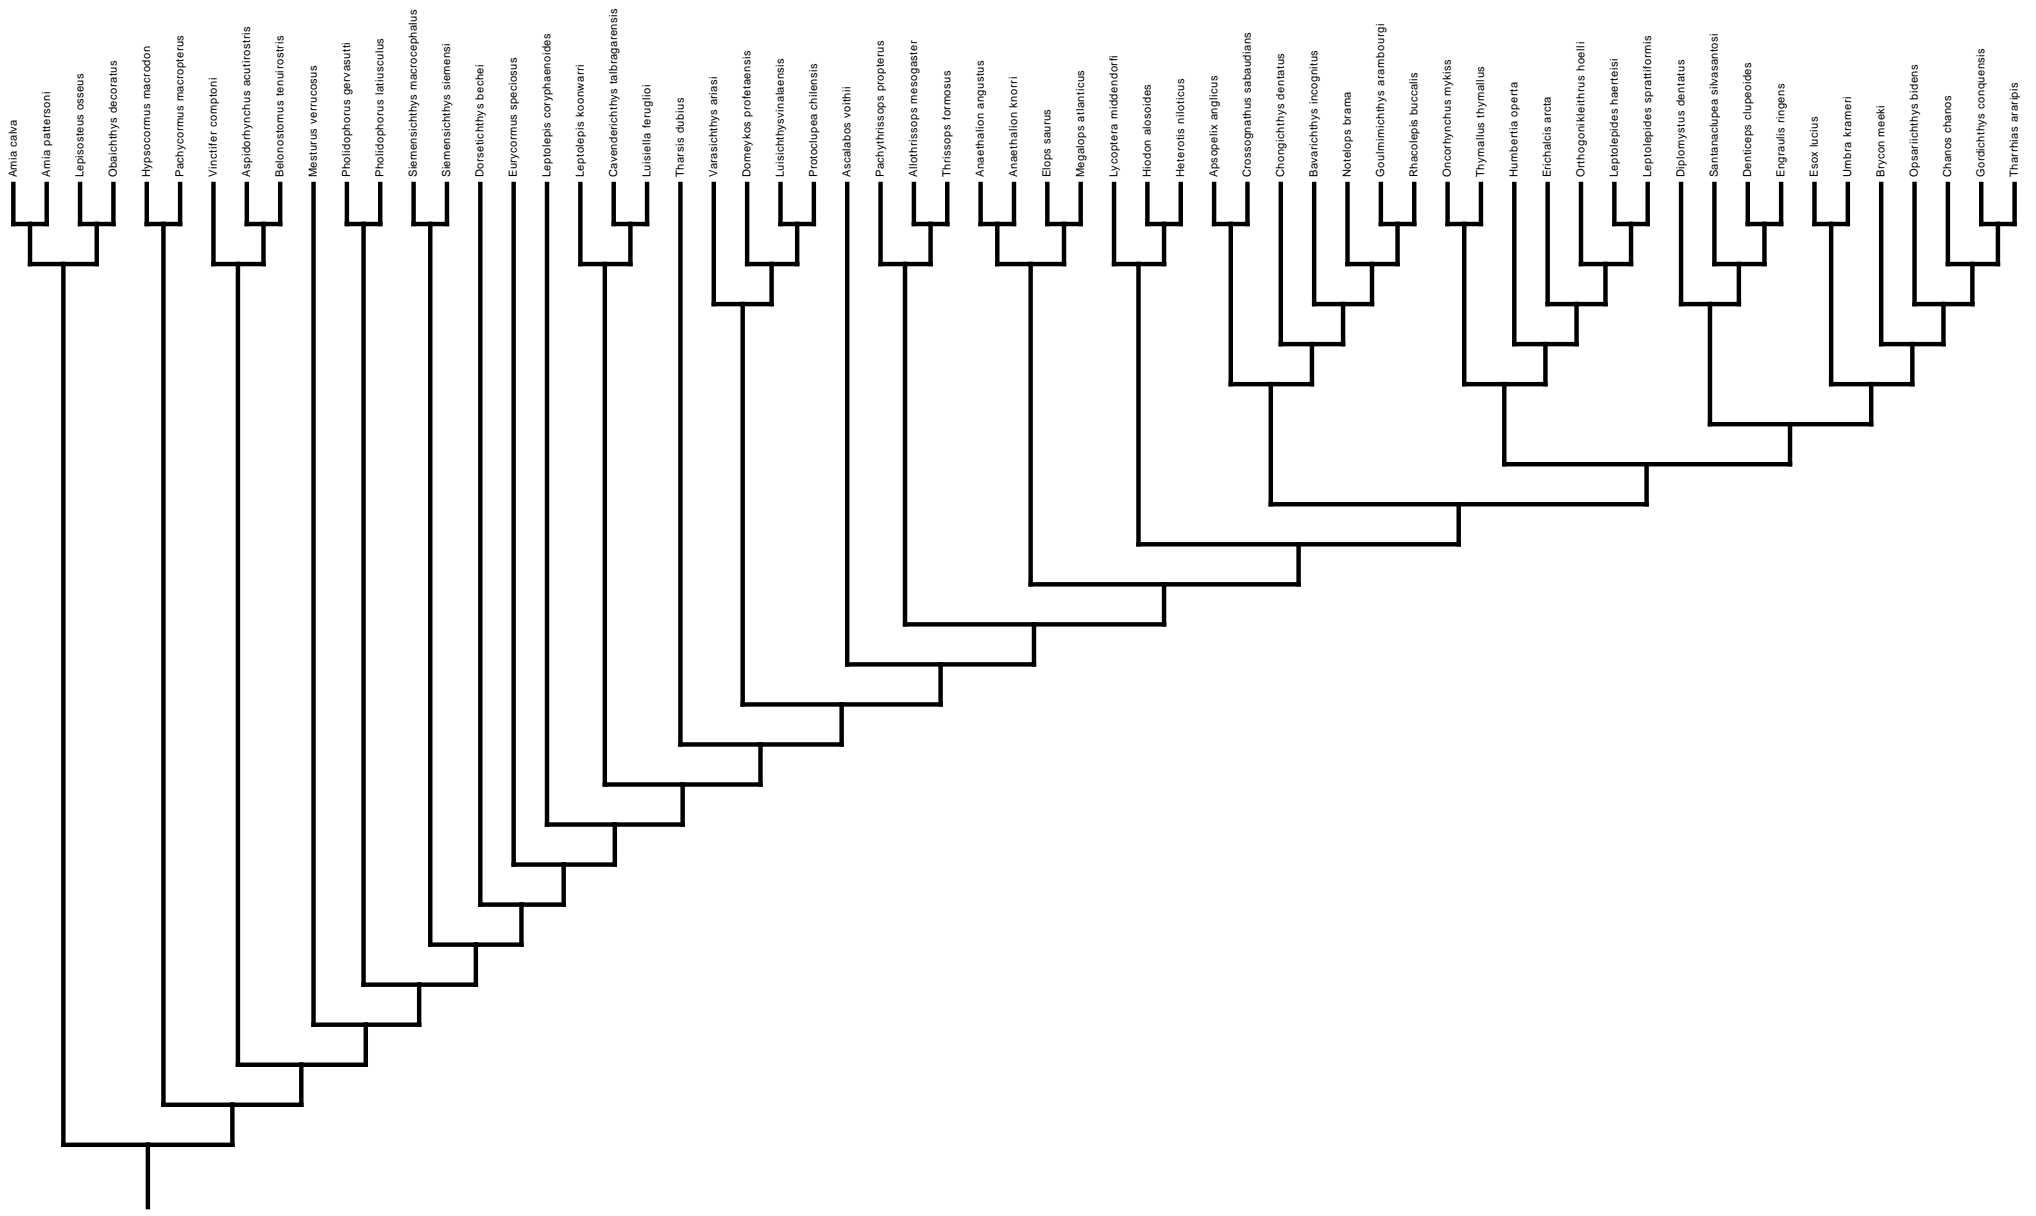

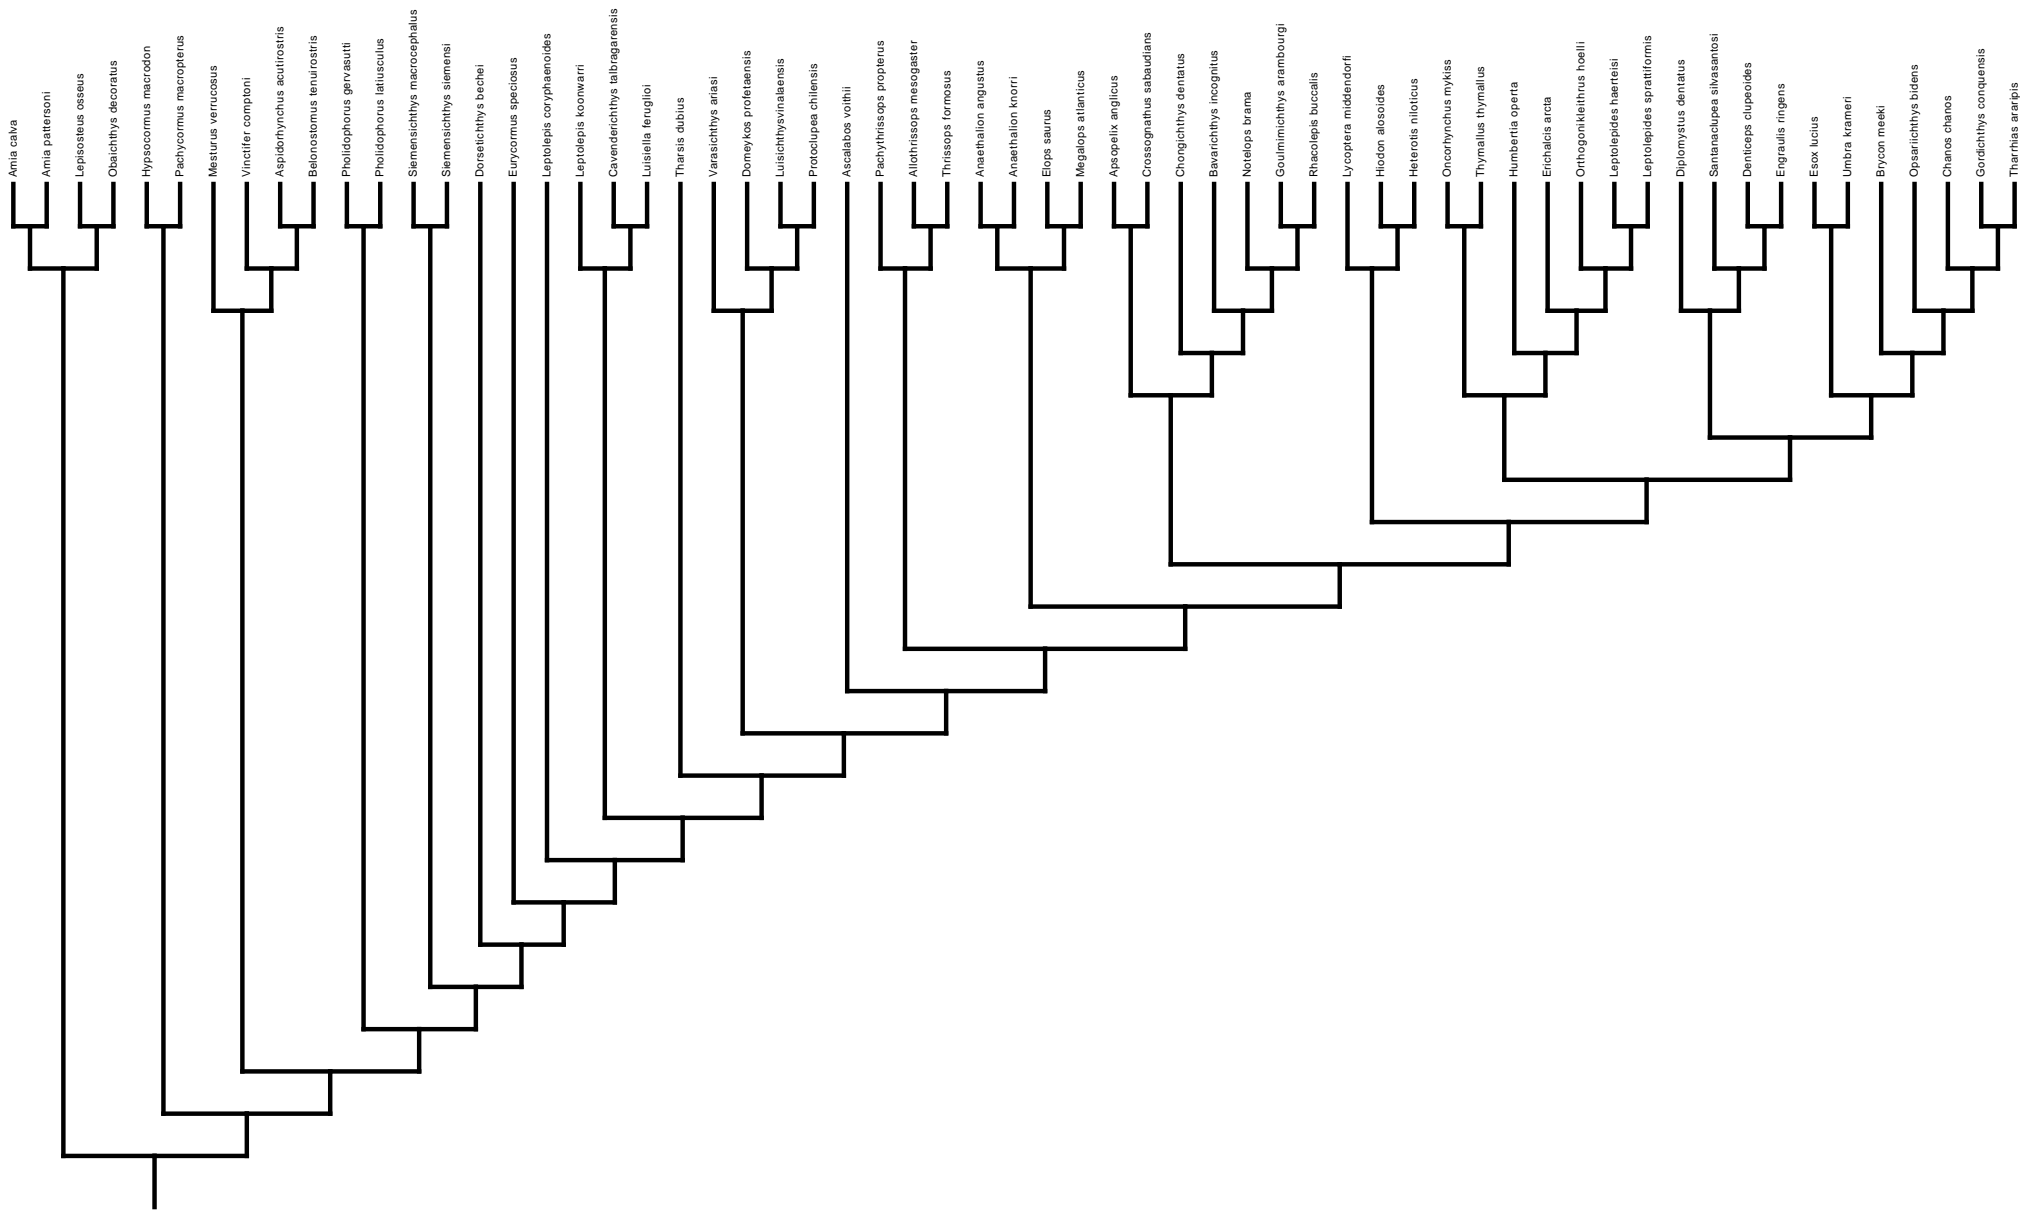

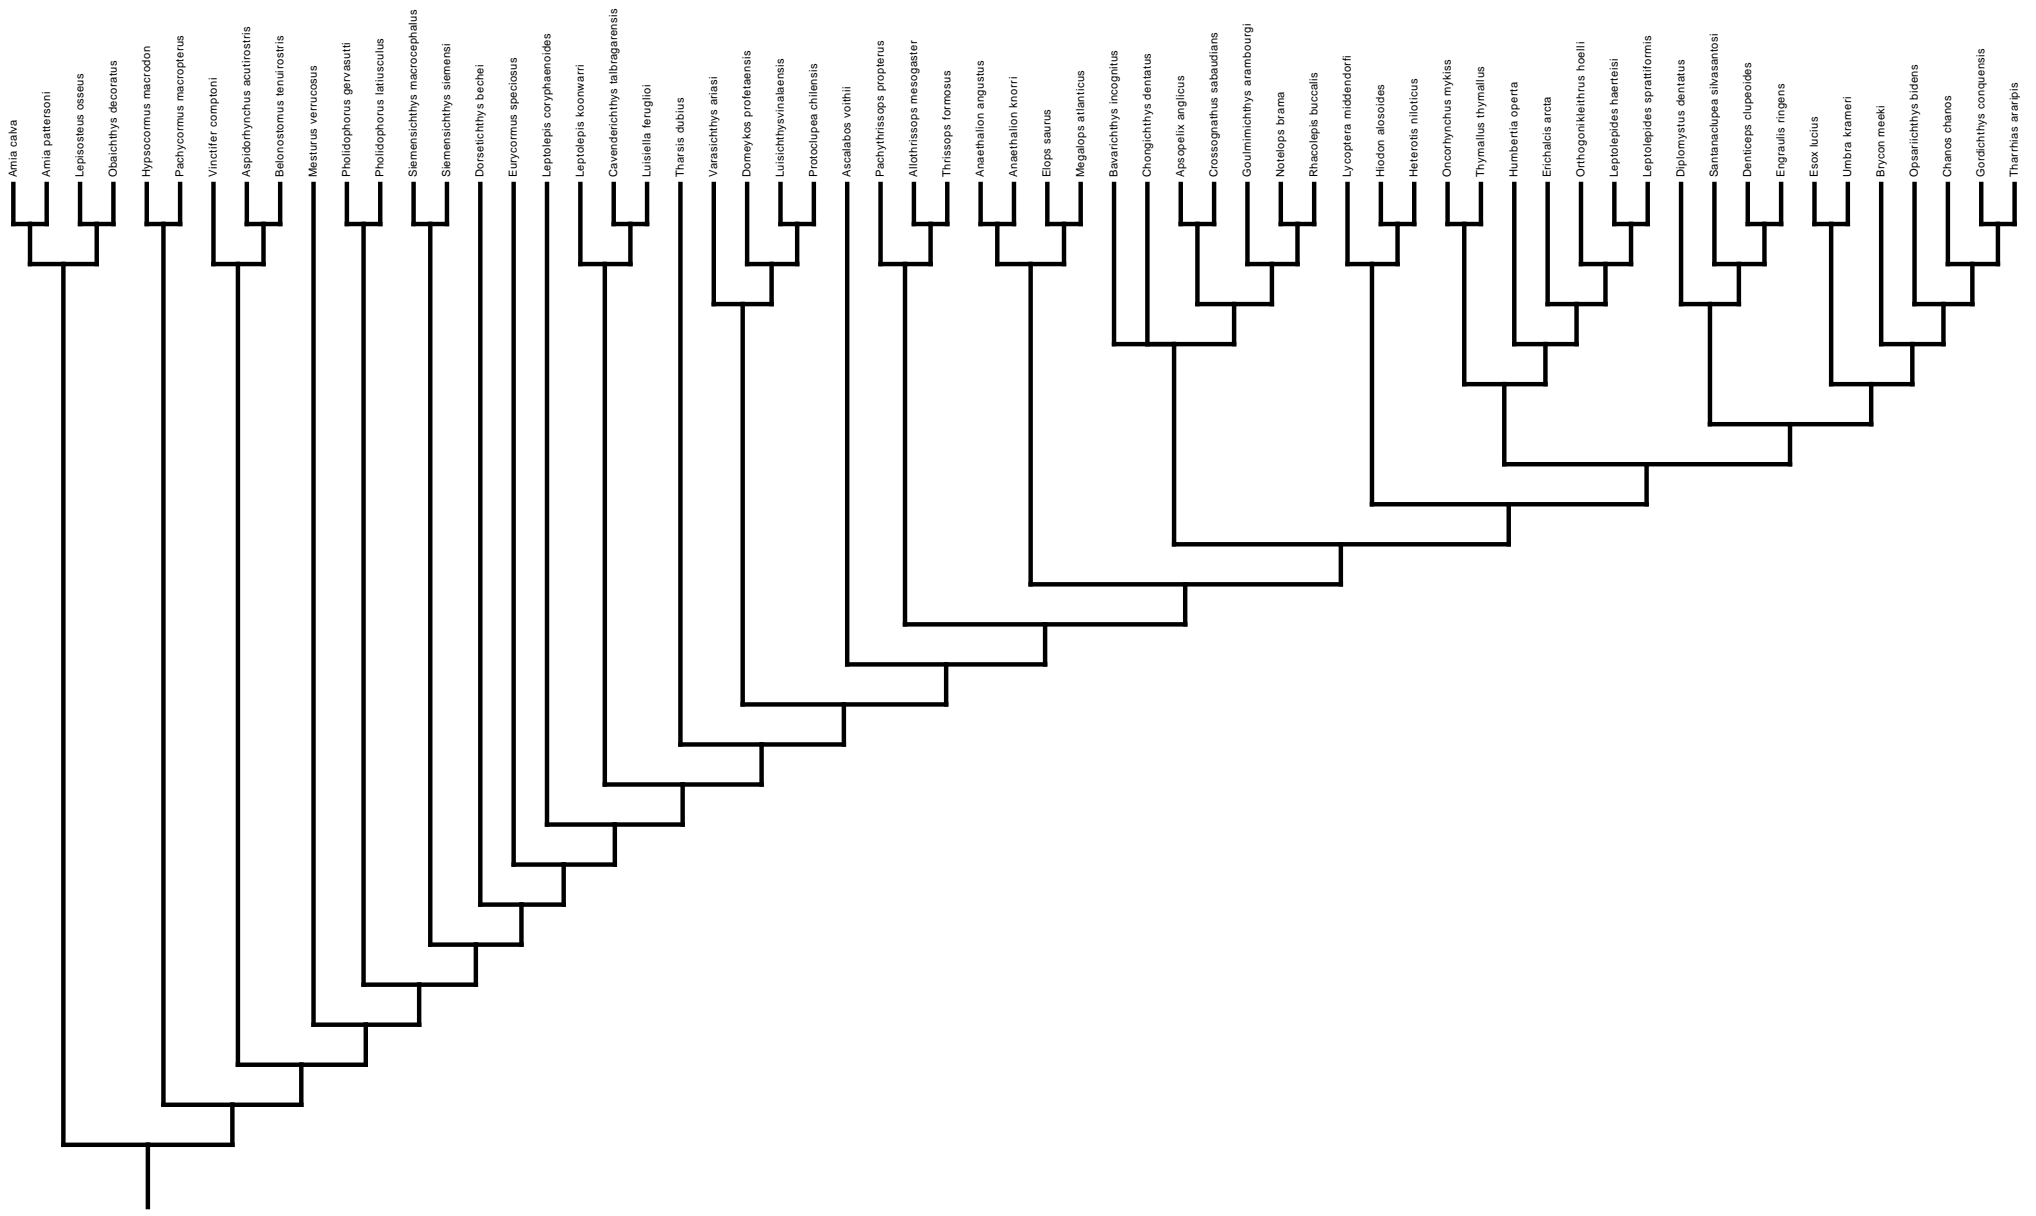



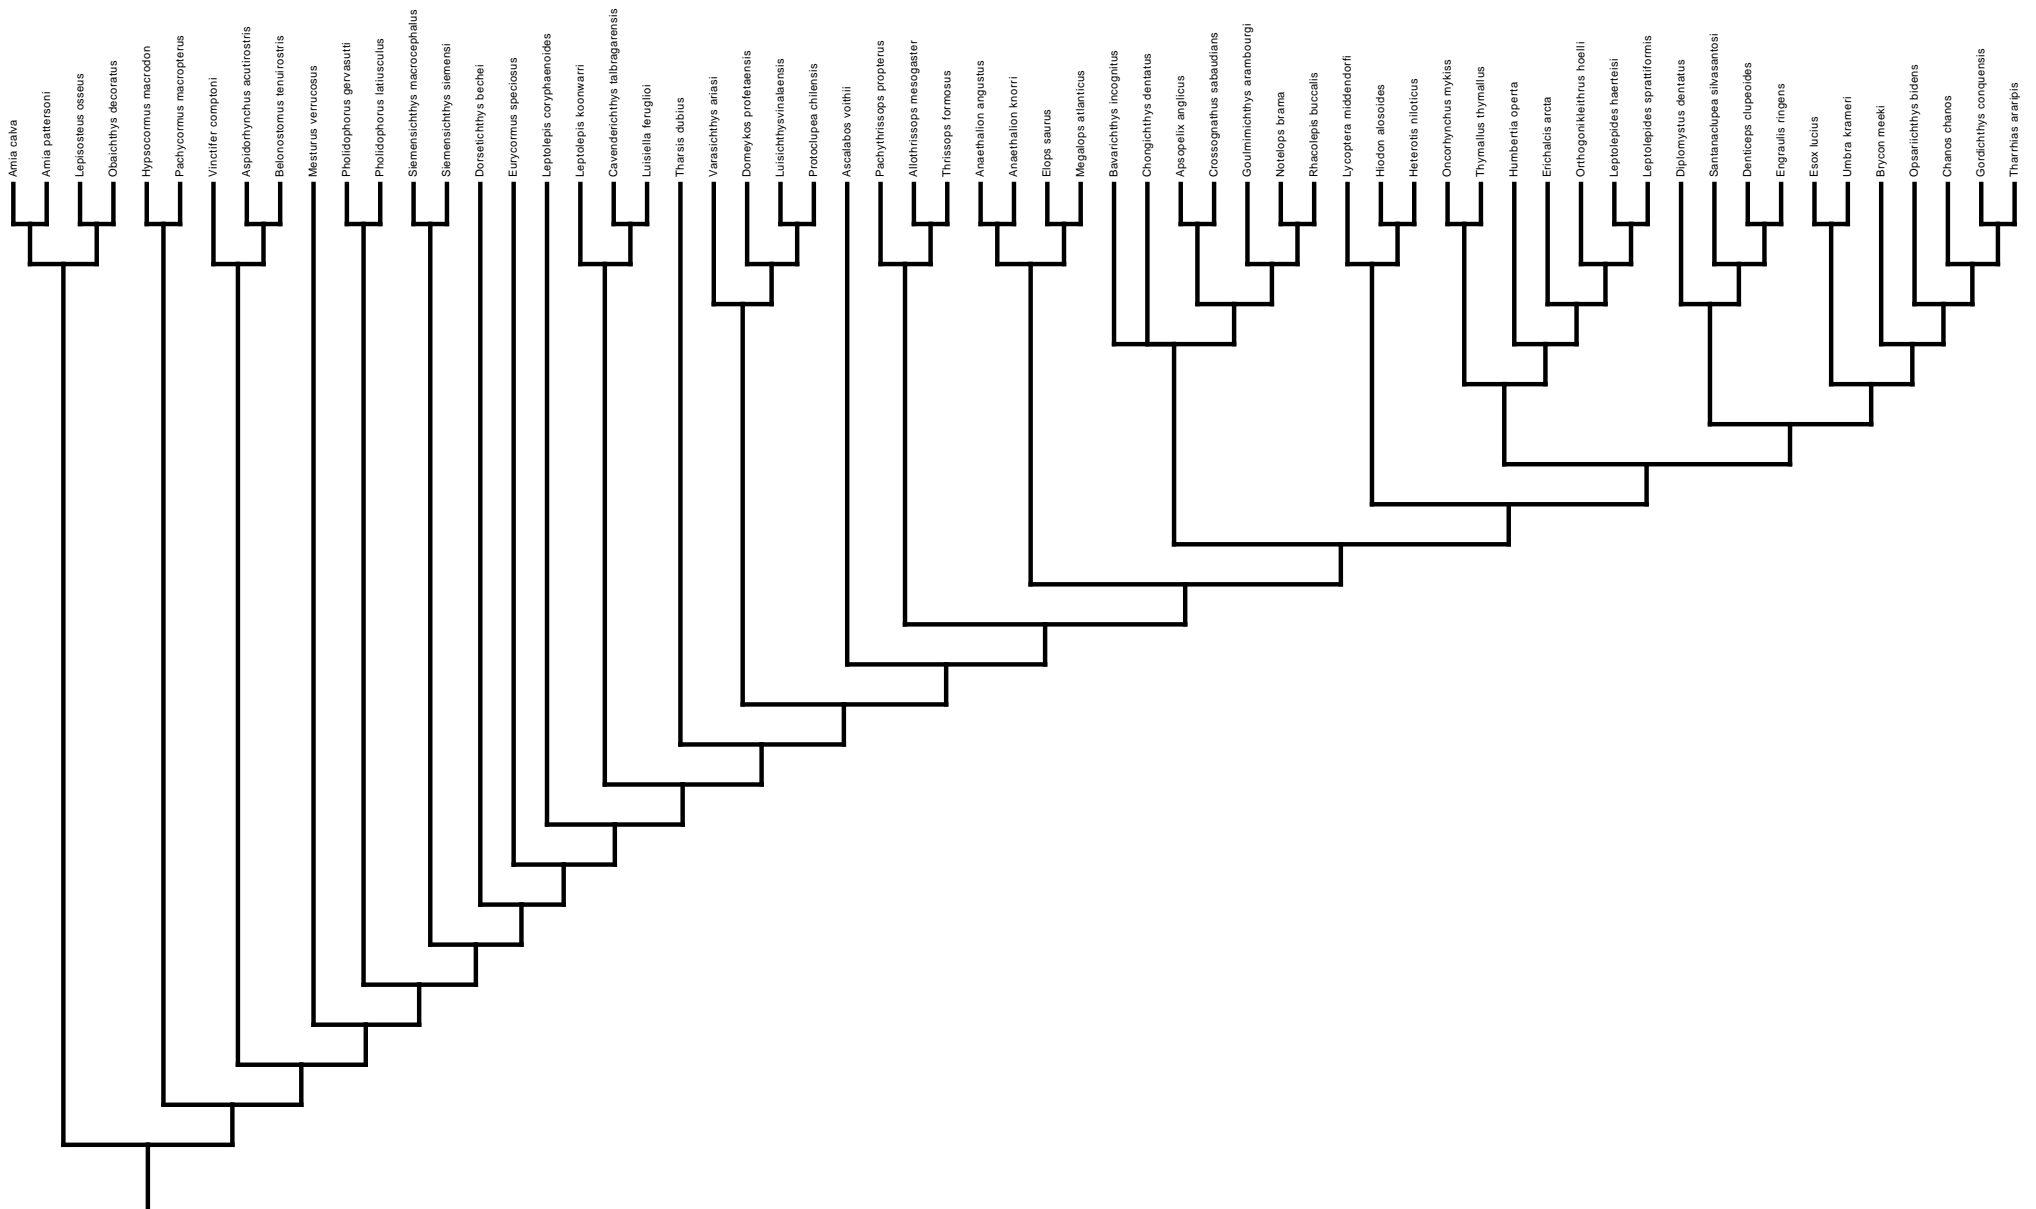

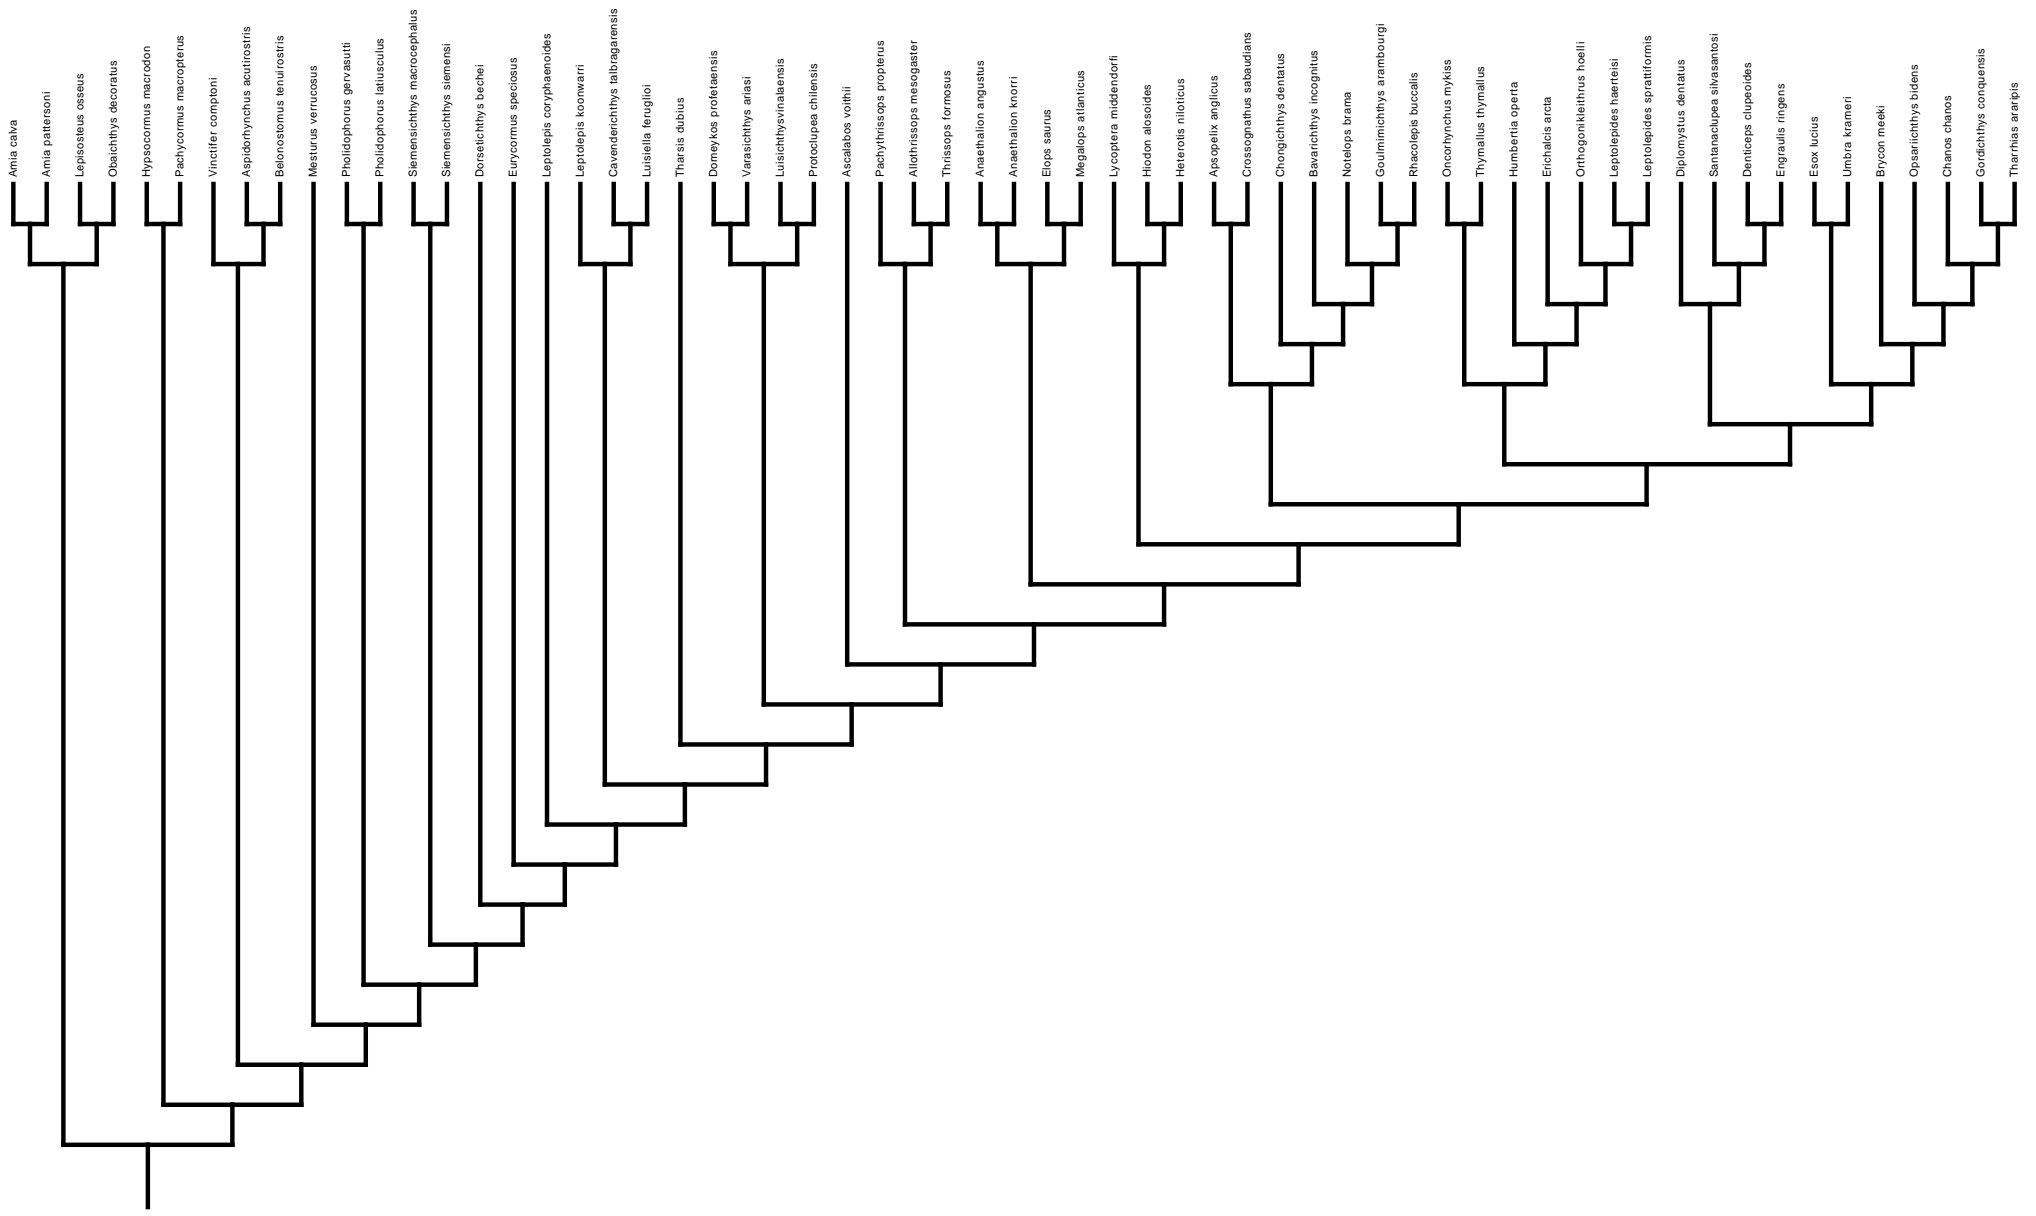

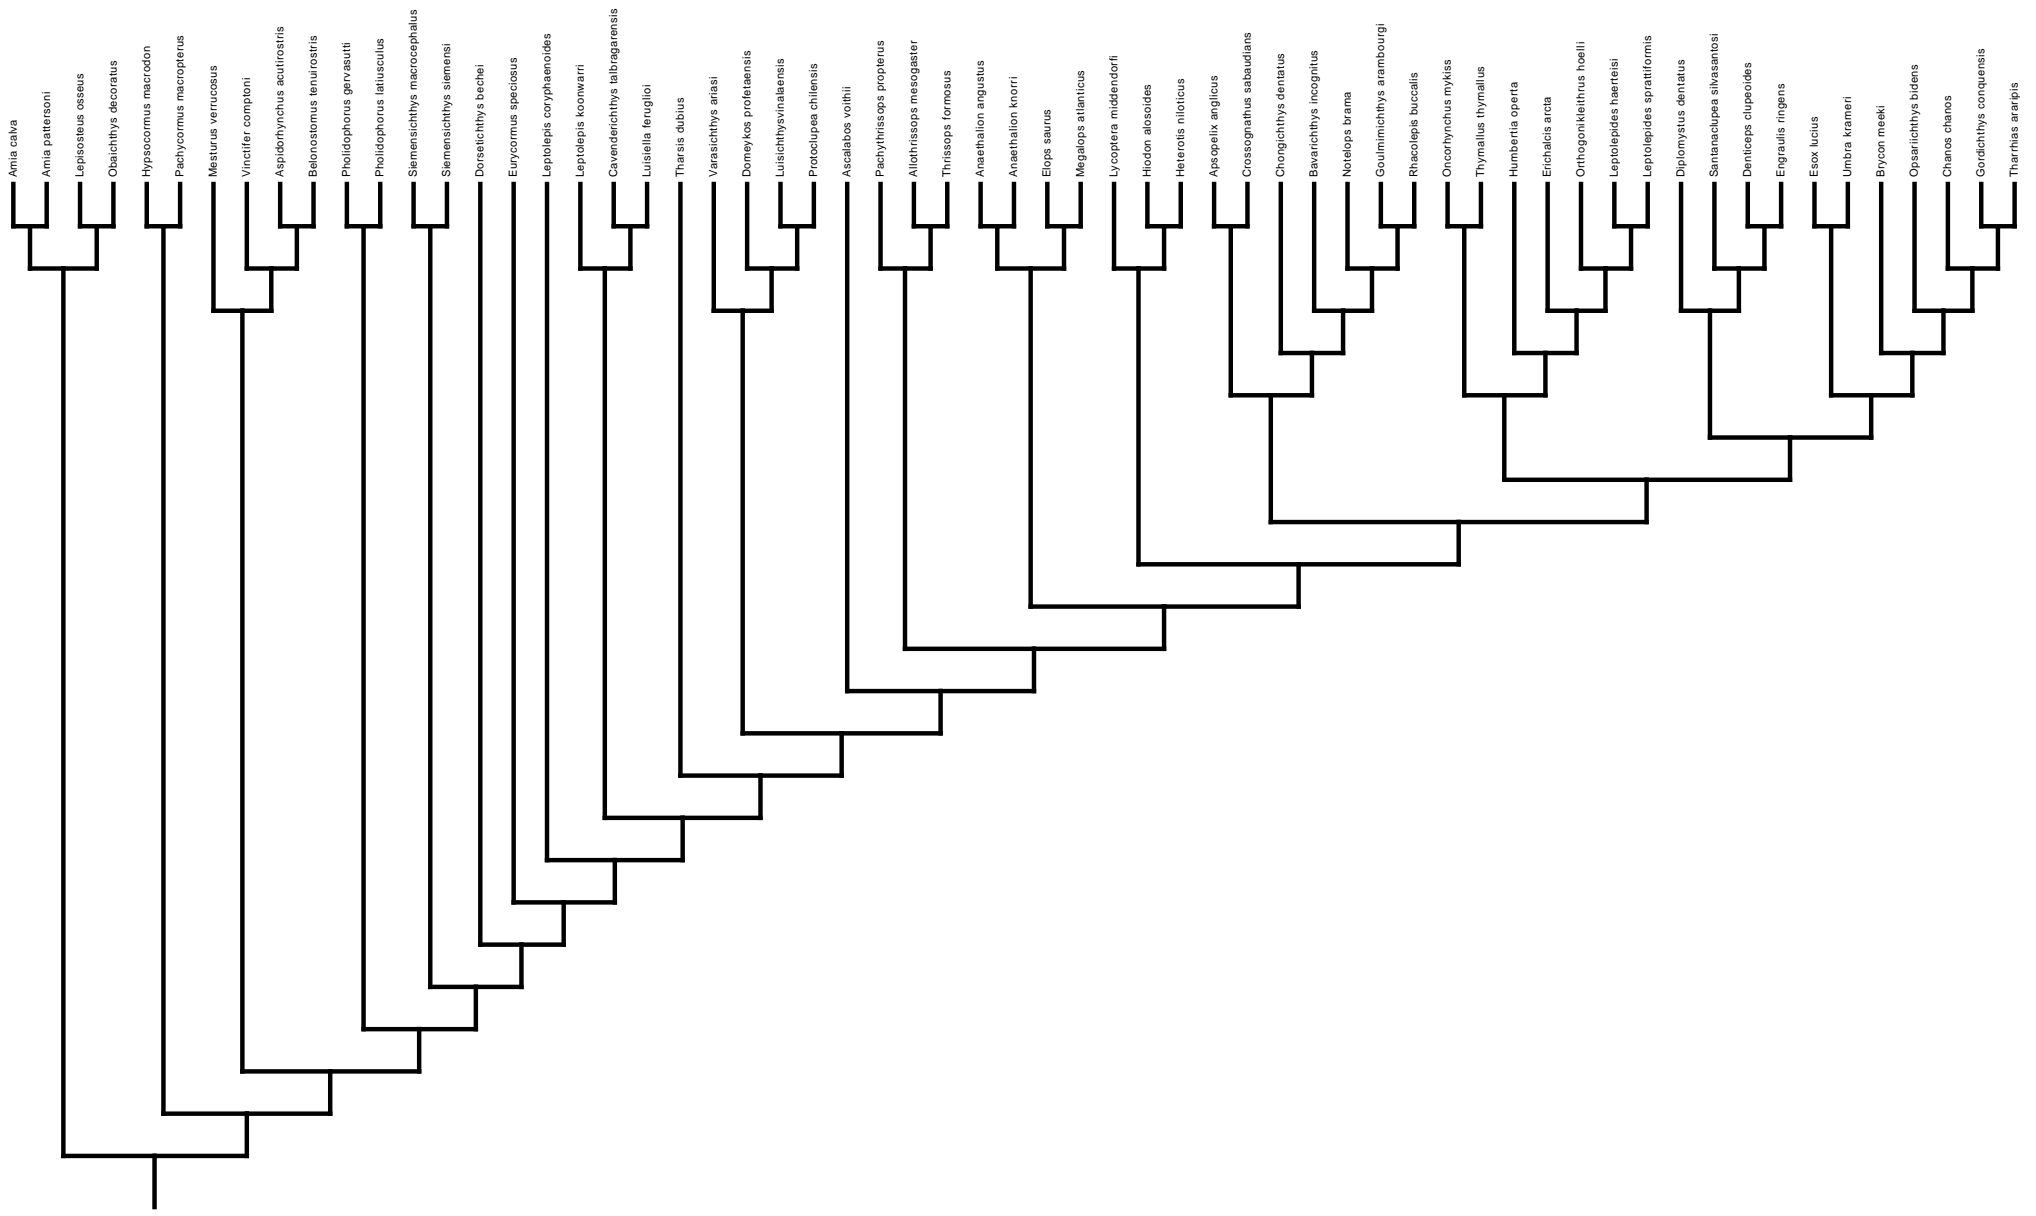

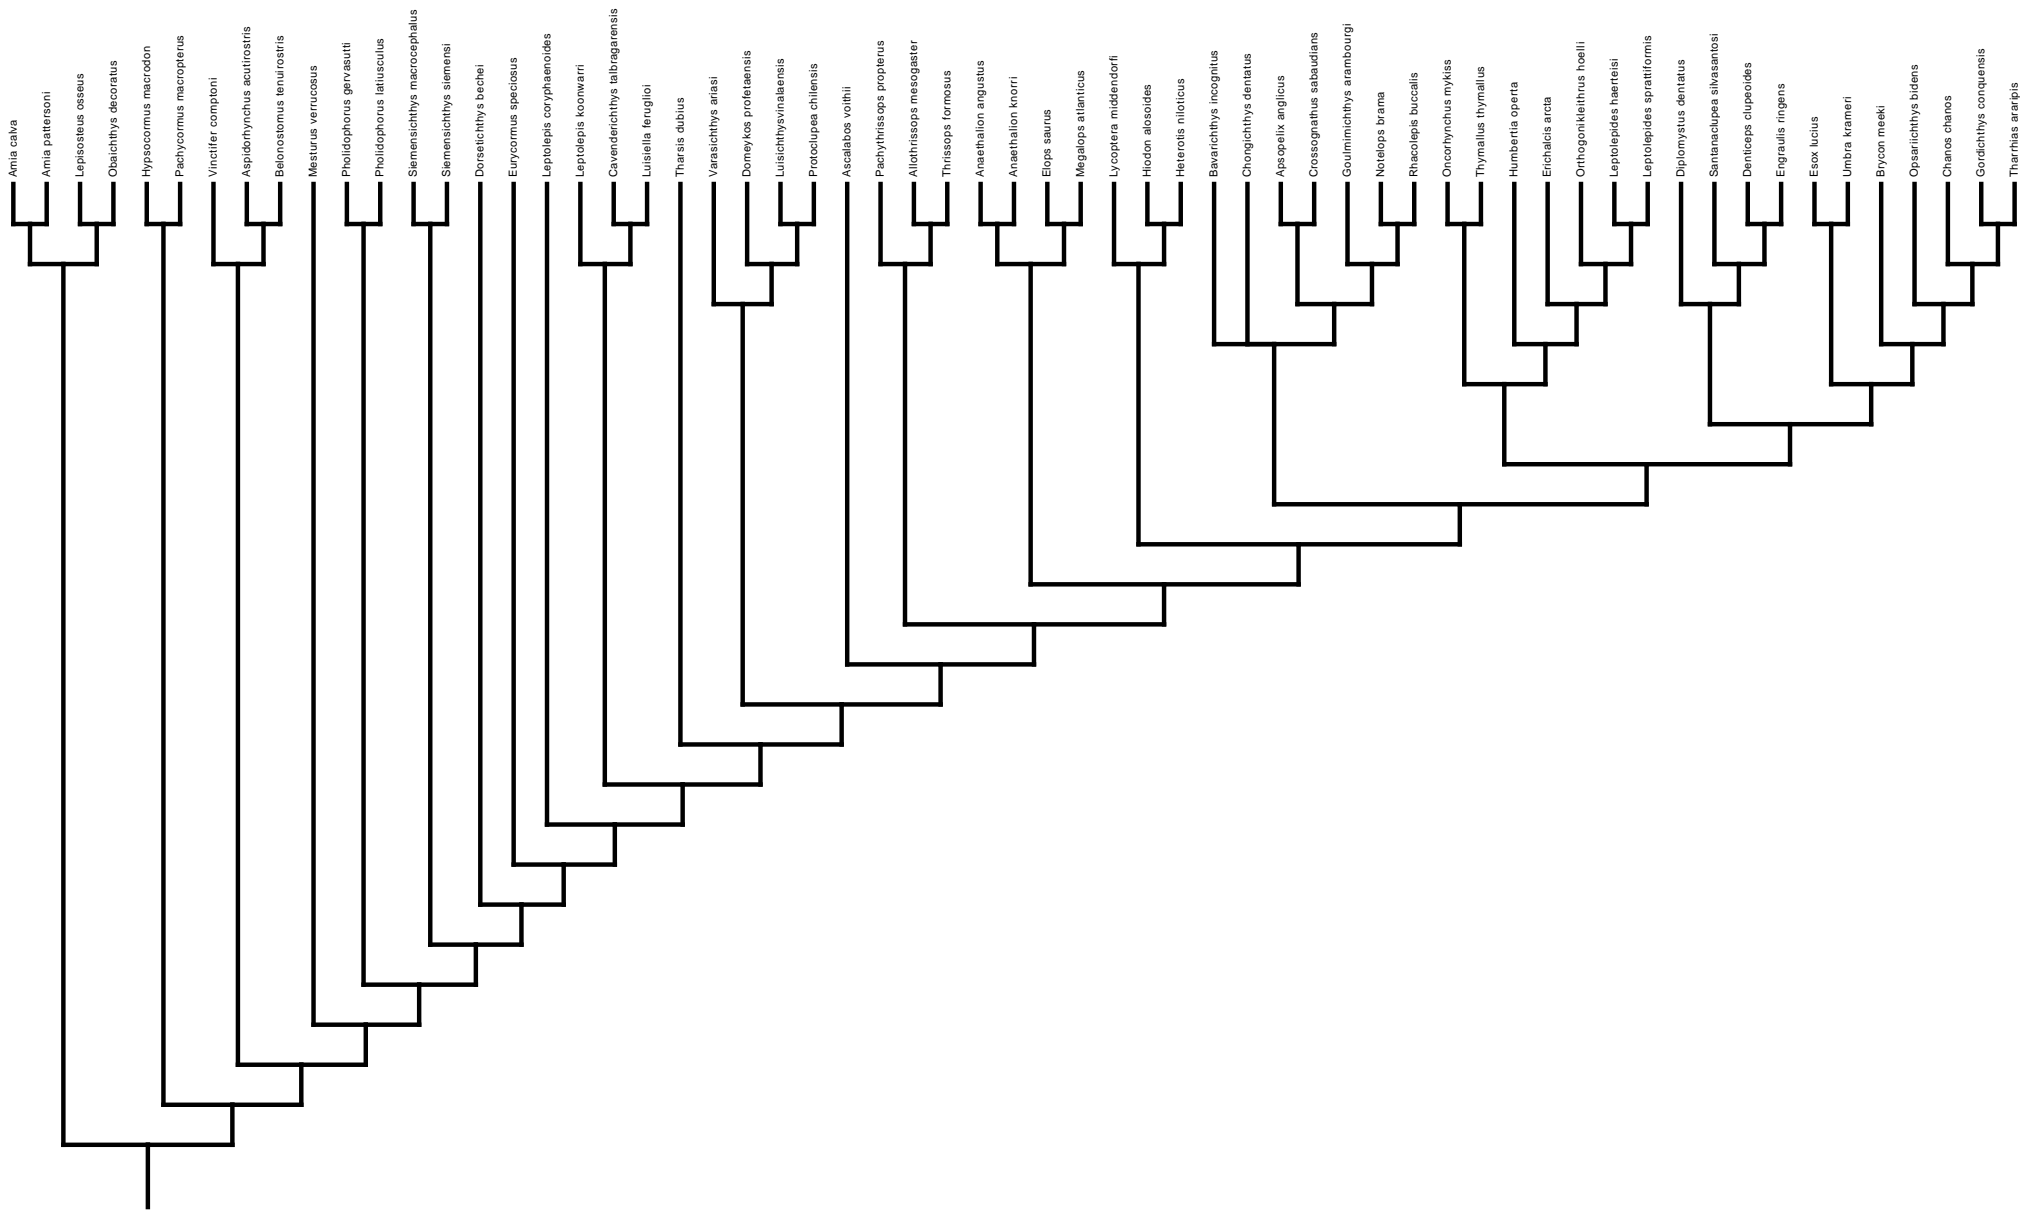

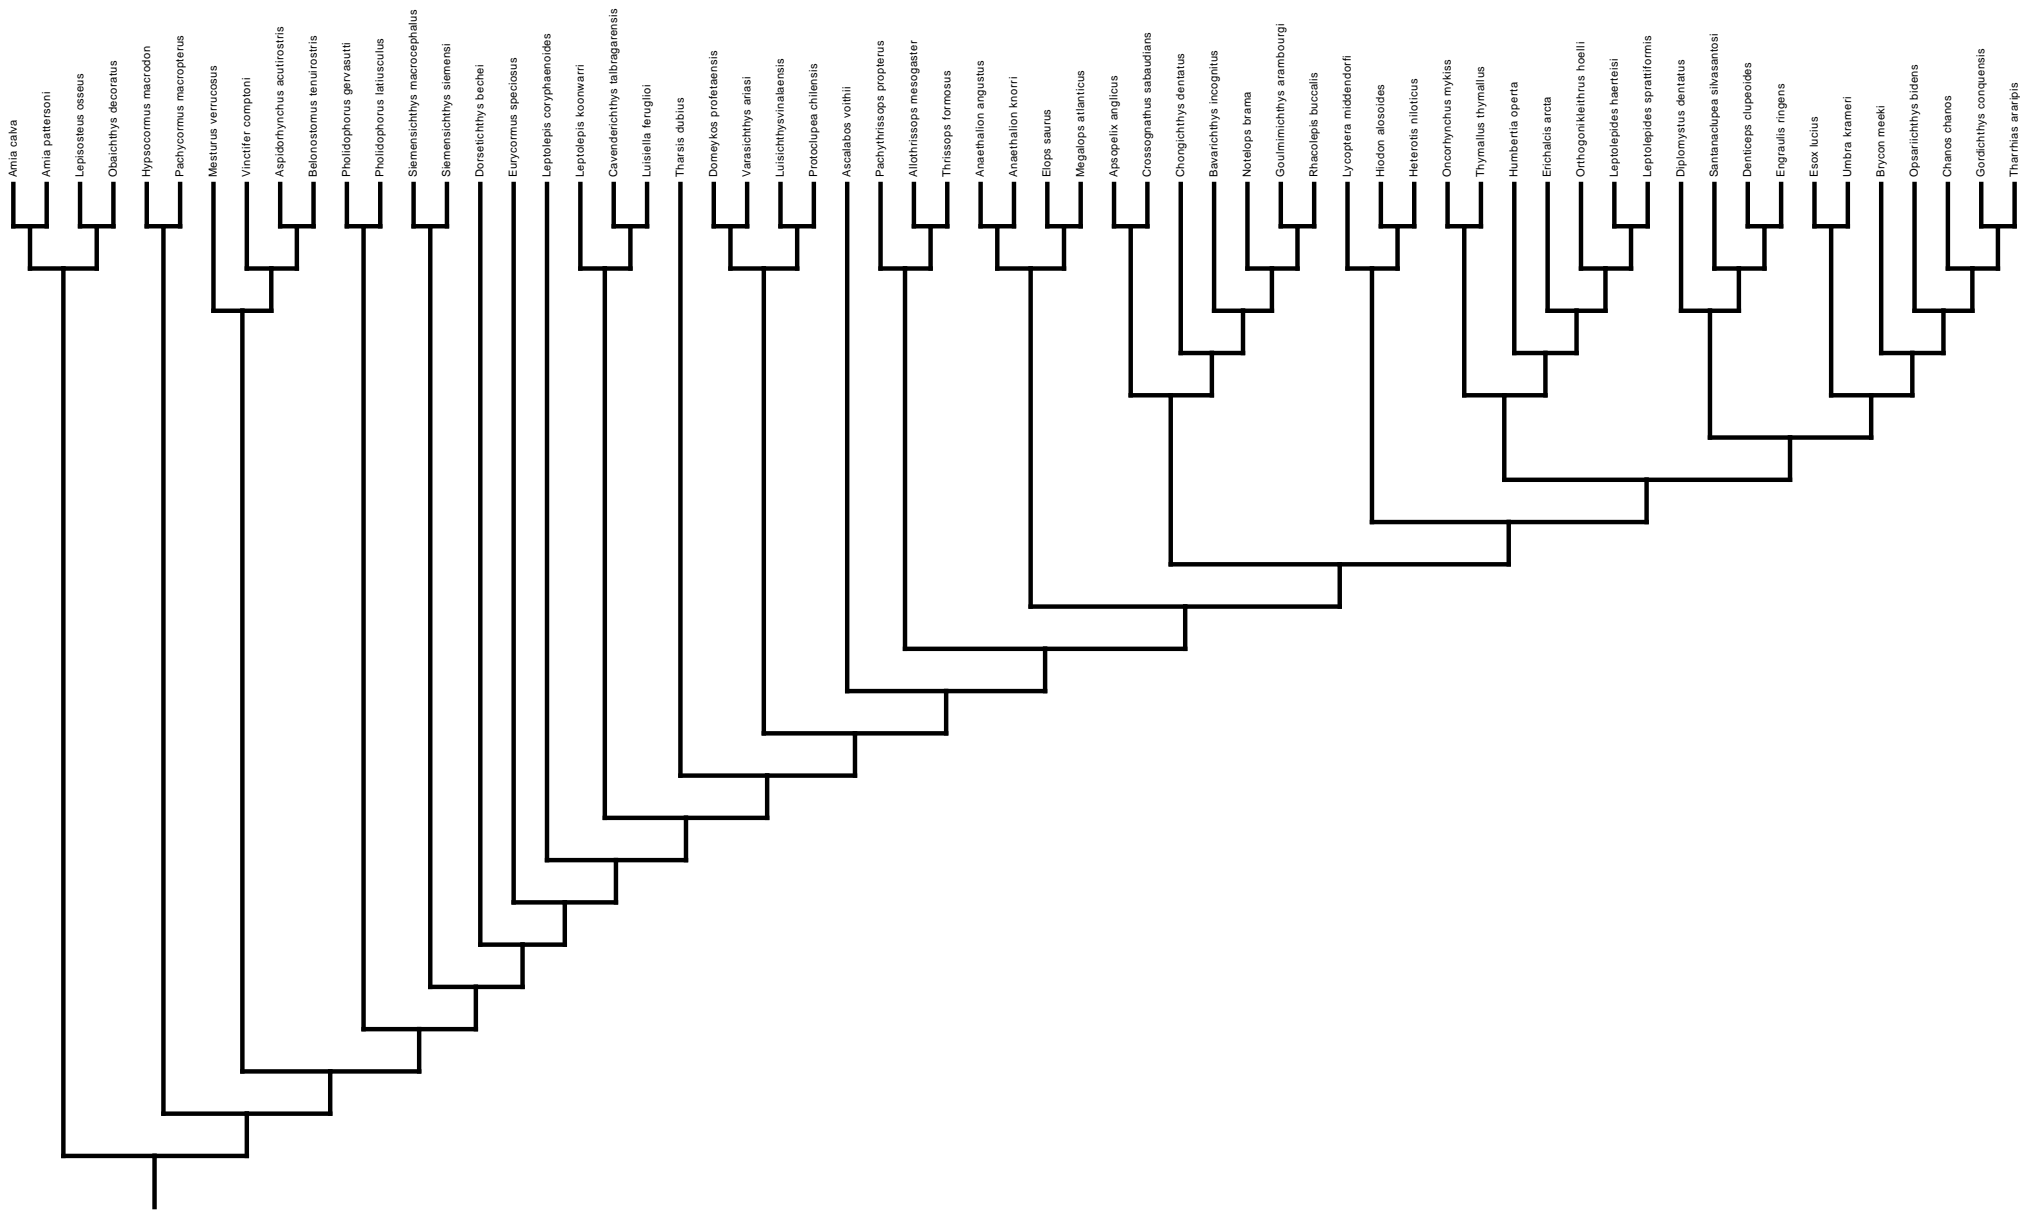

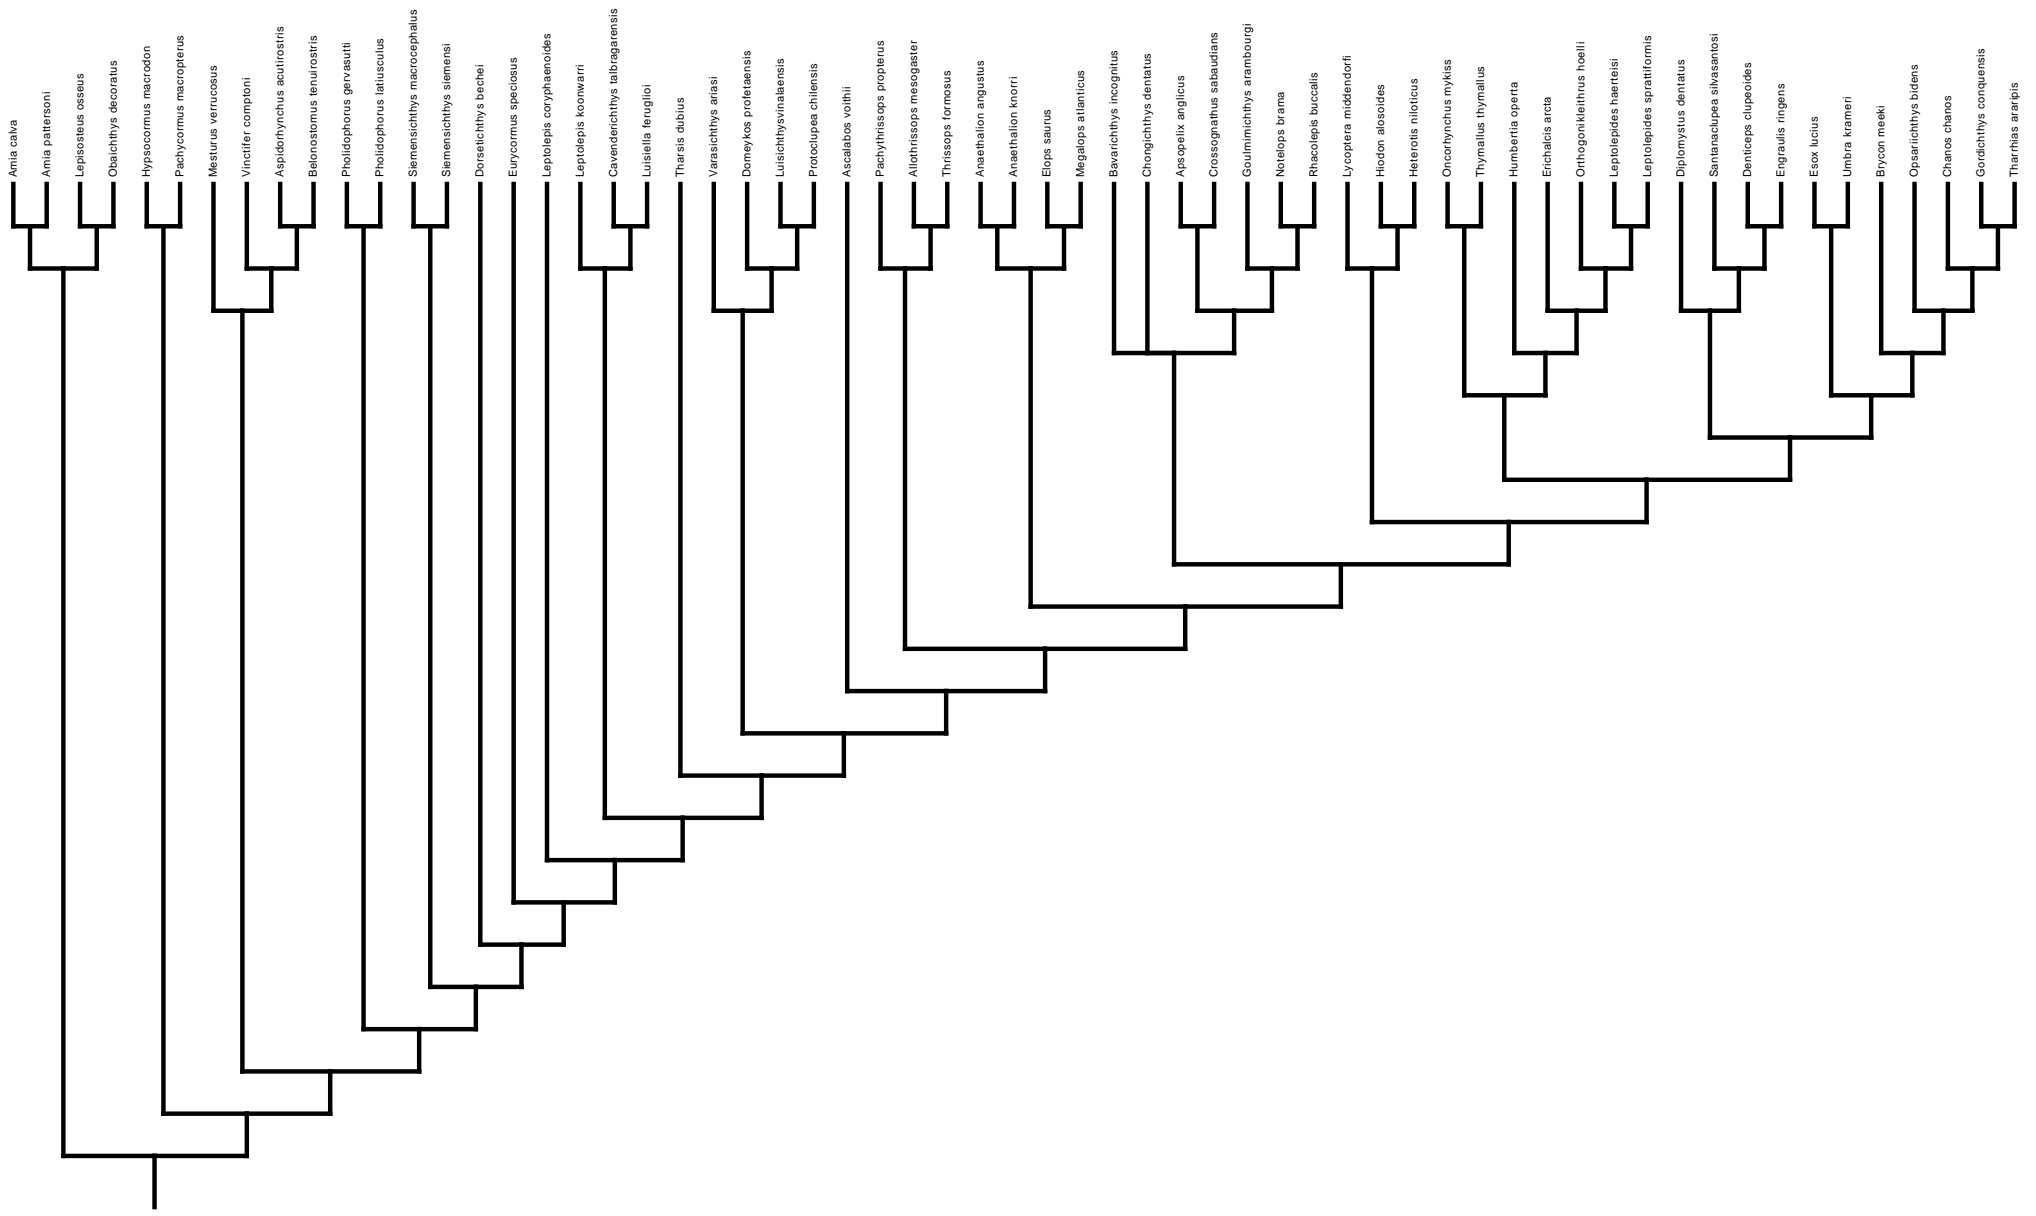

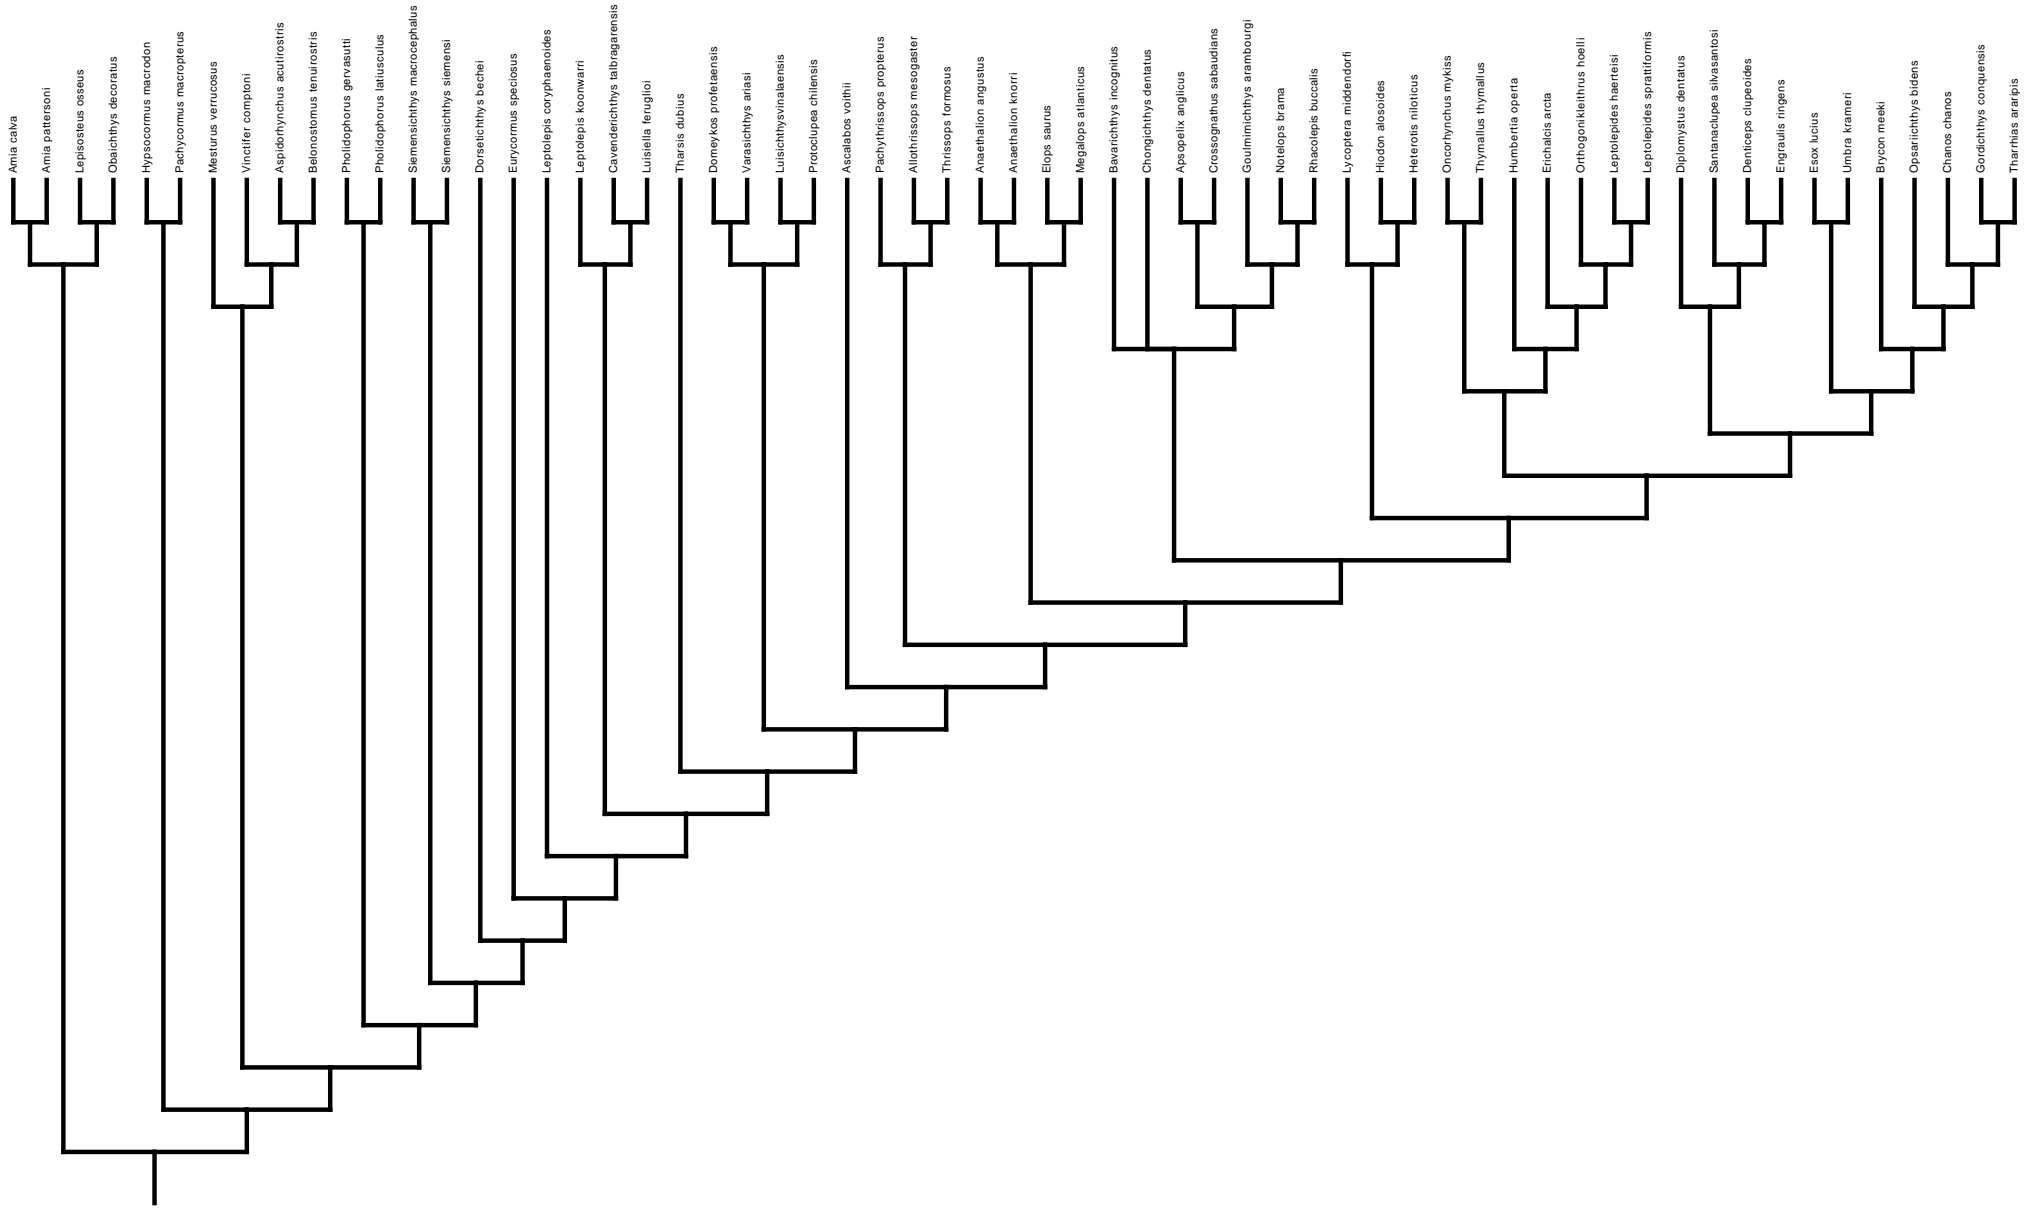

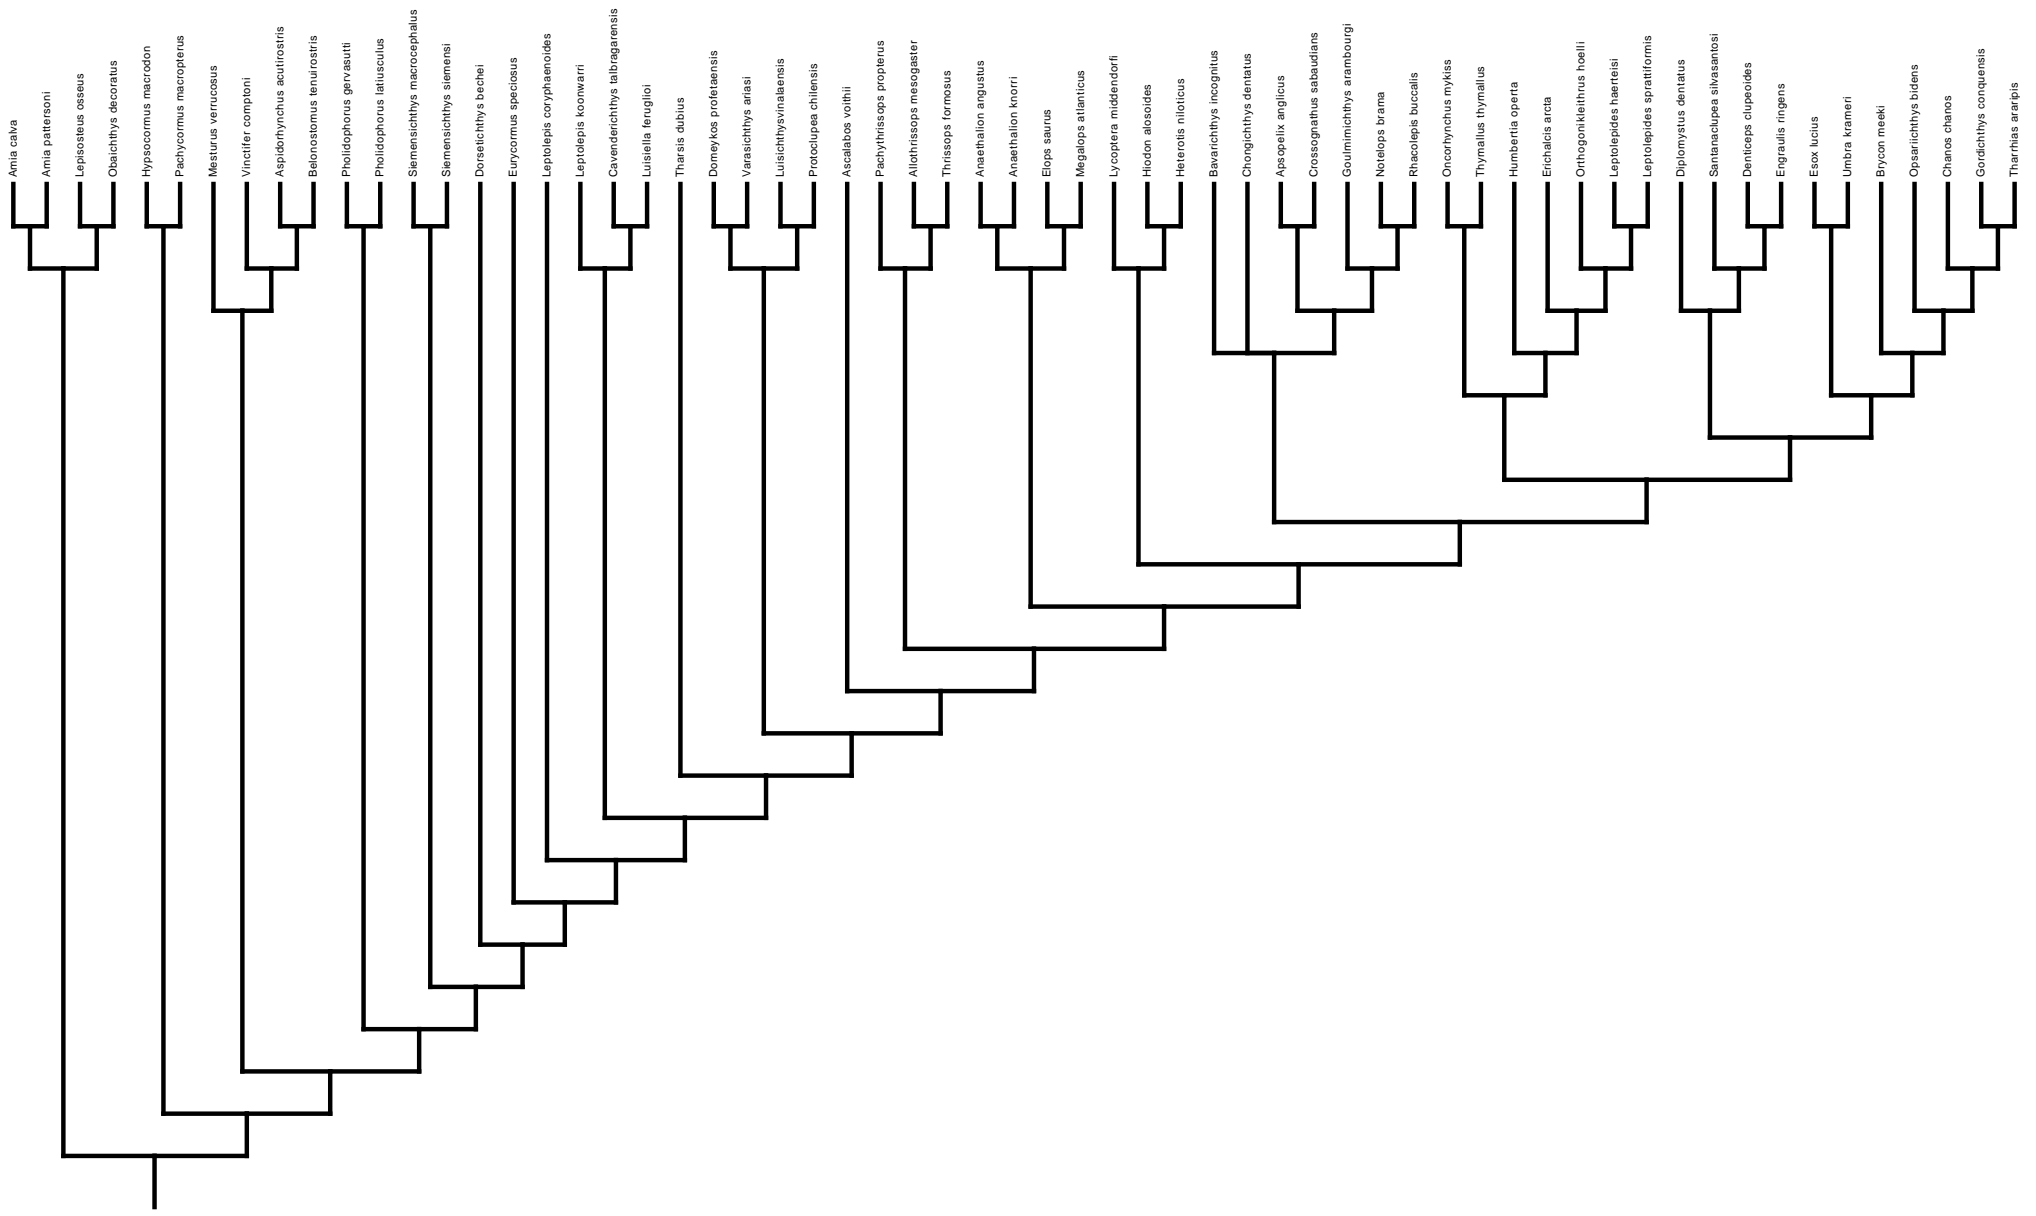



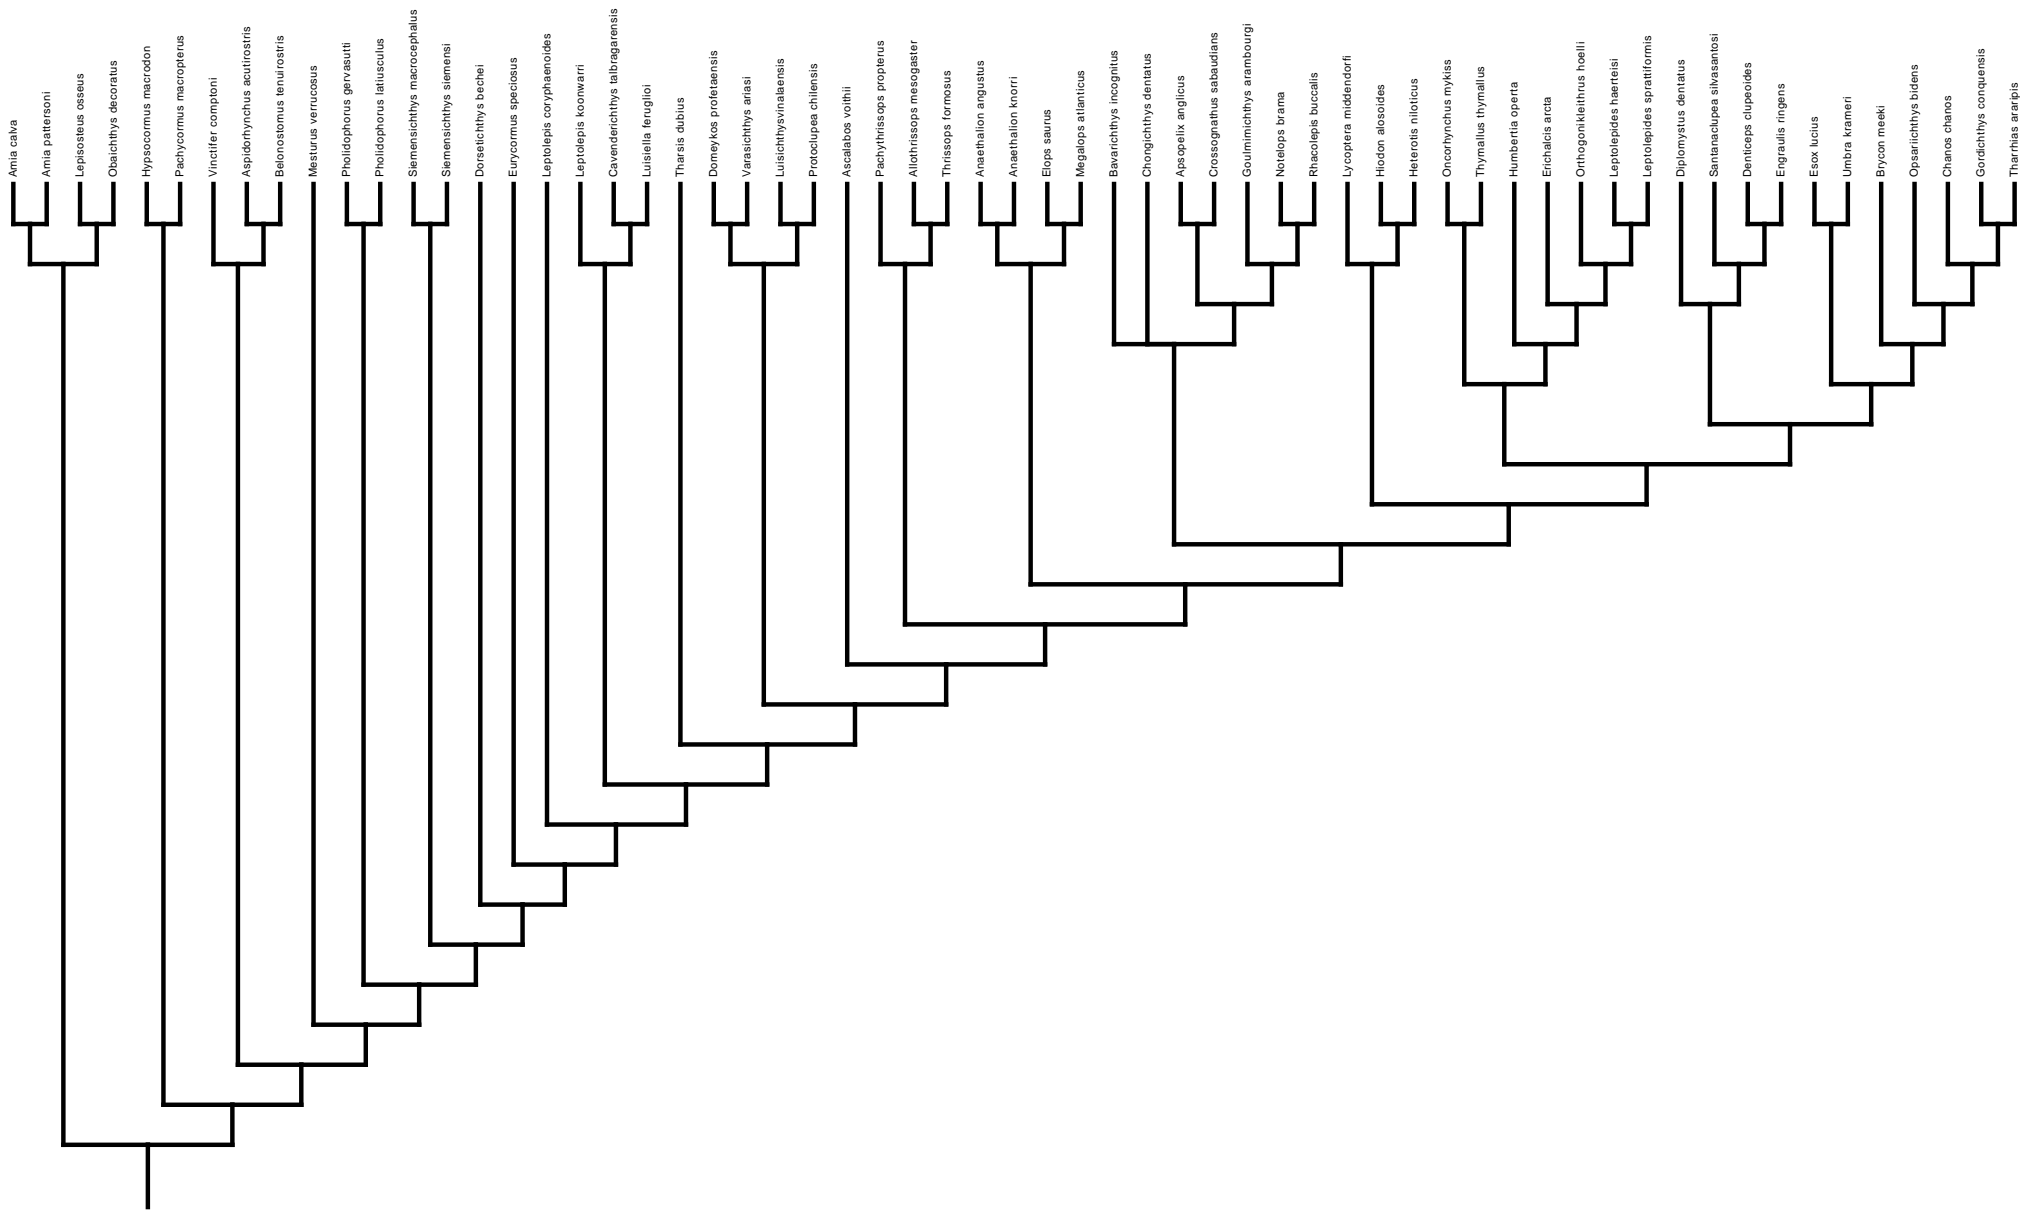

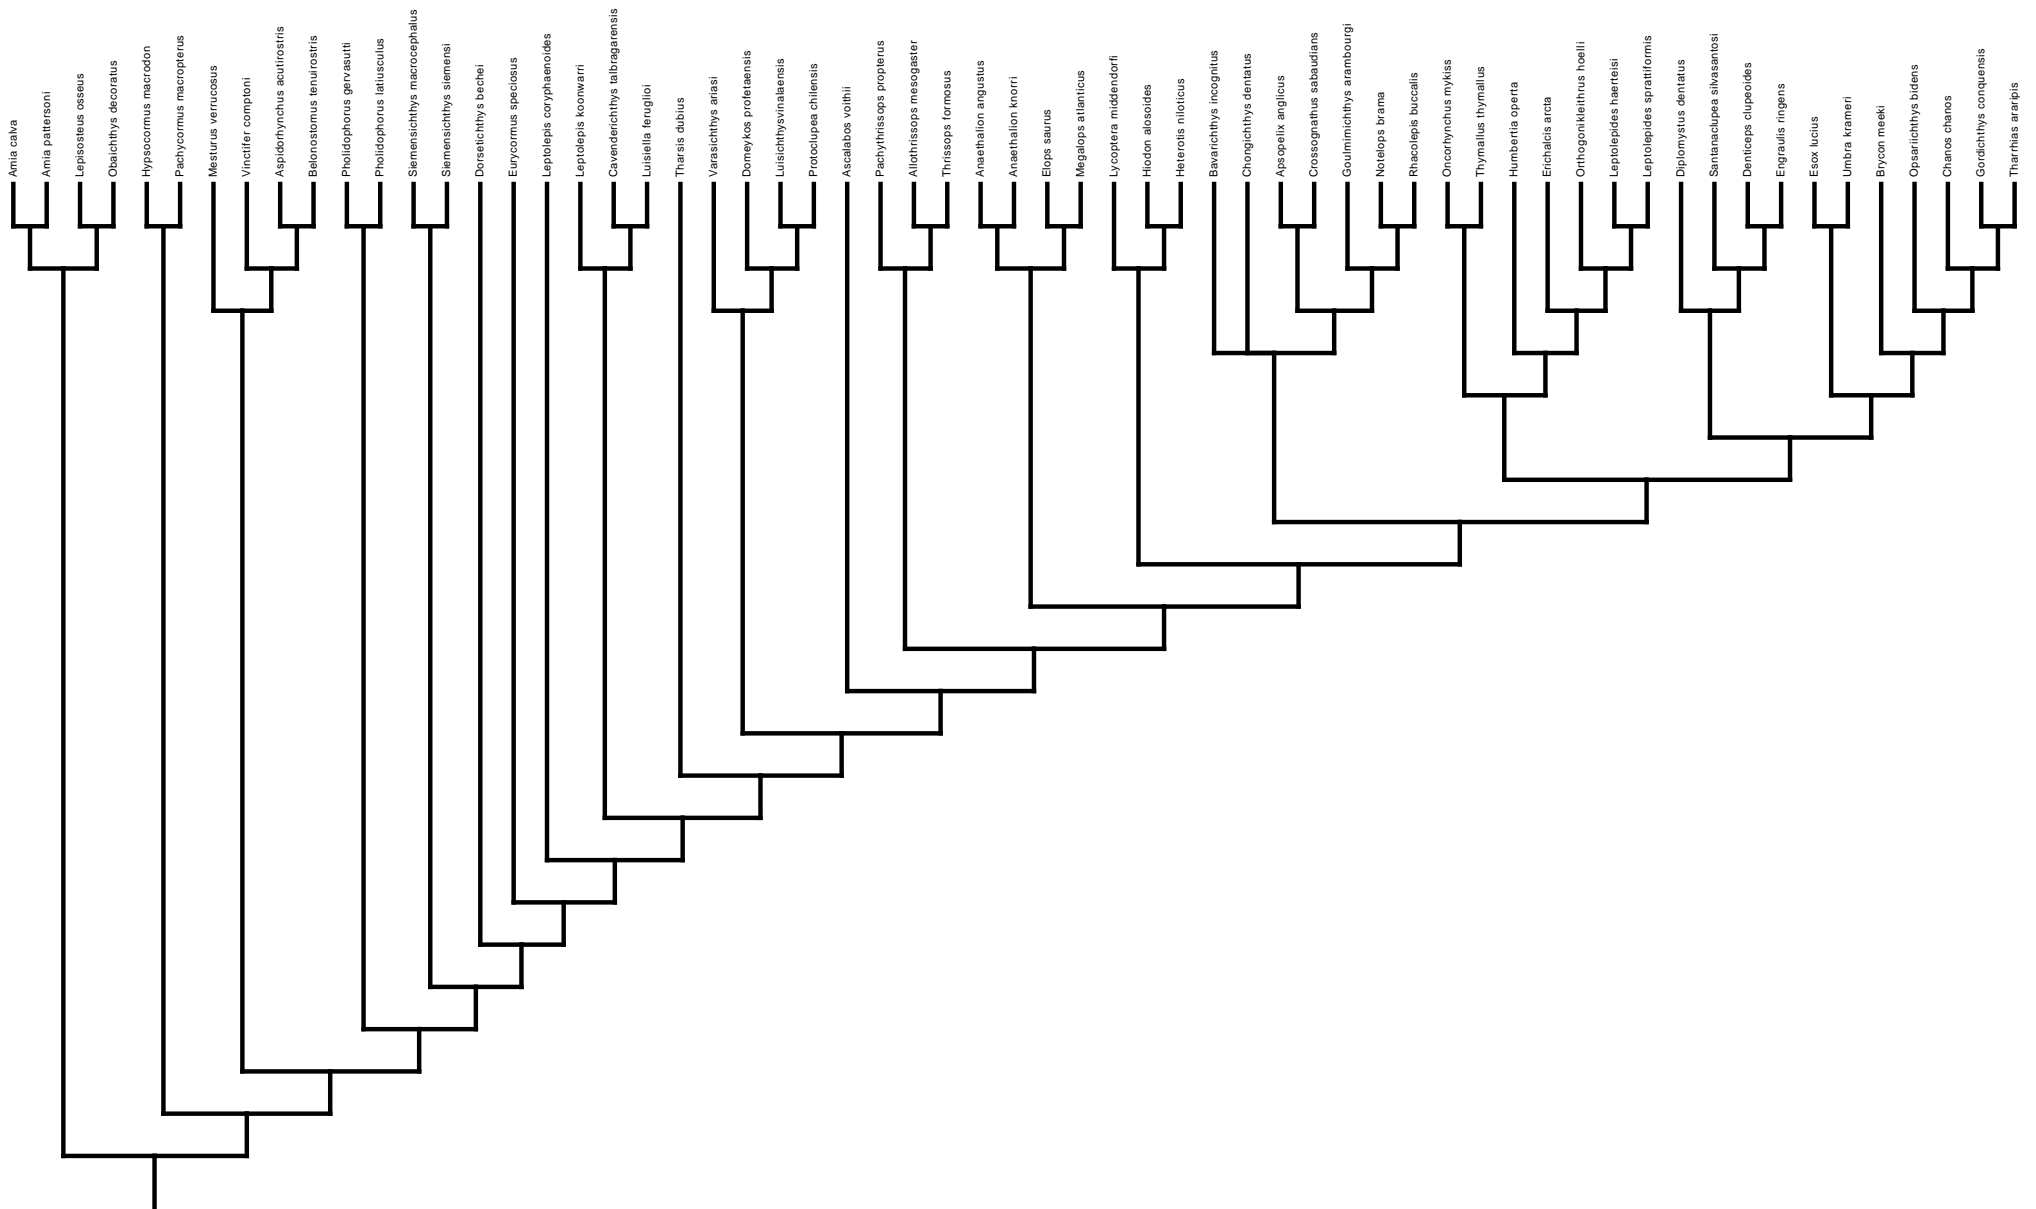

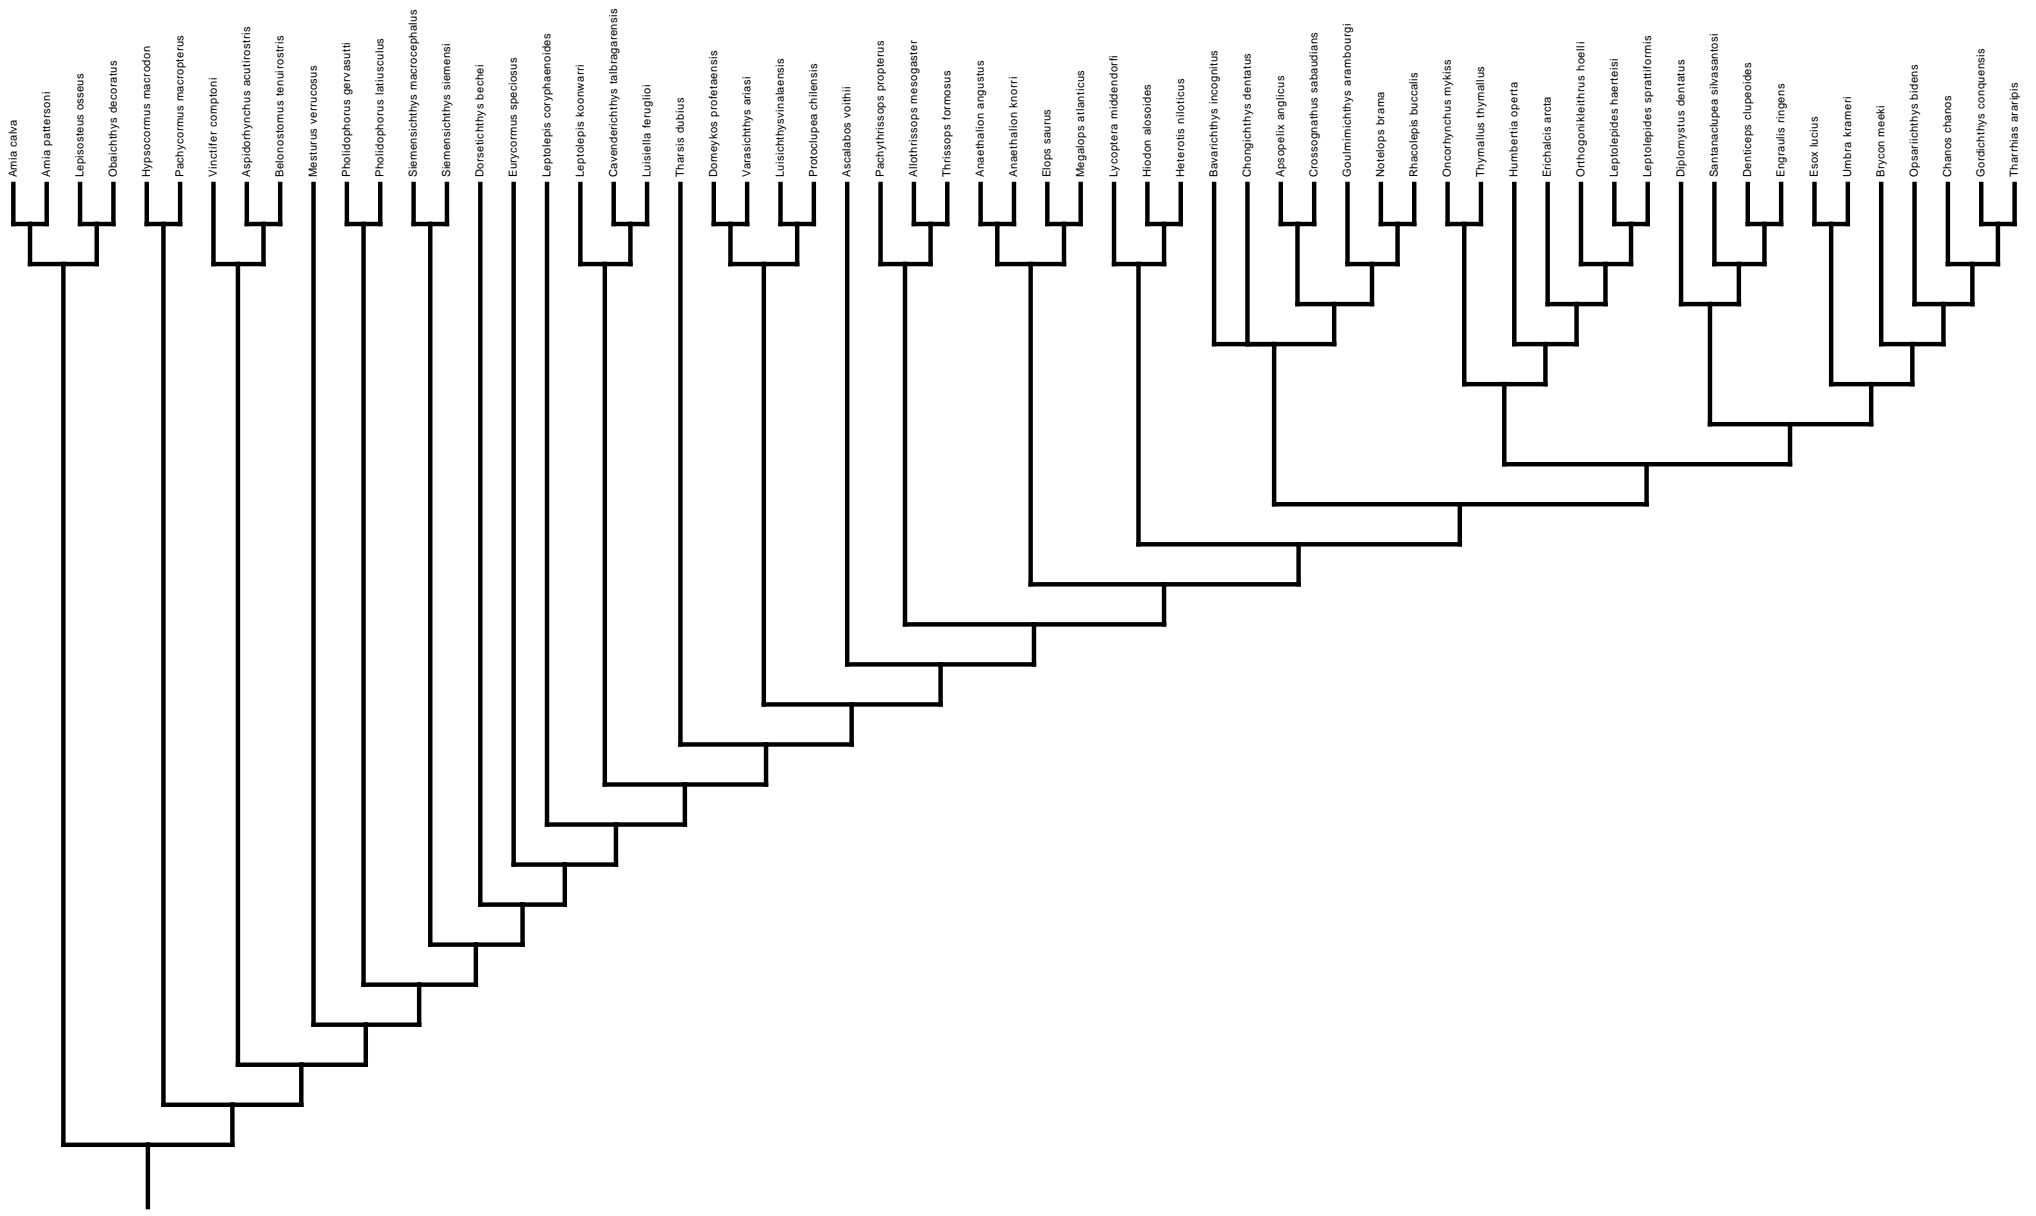



Supplement: 12862_2015_551_MOESM3_ESM.pdf [file 12862_2015_551_MOESM3_ESM.pdf]
